# Supplementary material for: Proteomics analysis and proteogenomic characterization of different physiopathological human lenses
Source: BMC Ophthalmol. 2017 Dec 19;17:253. doi: 10.1186/s12886-017-0642-9 (PMC5735820; doi:10.1186/s12886-017-0642-9)
Supplement: Supplementary file 1 — Identification and quantification of total proteins across the RLSC, CC and ARC groups. (XLSX 217 kb) [file 12886_2017_642_MOESM1_ESM.xlsx]

## Sheet: Sheet1
Supplementary Table S1. Identification and quantification of total proteins across the RLSC, CC and ARC groups.
No	Unused	Total	%Cov	%Cov(95)	Accession	Name	Peptides(95%)	113:121	114:121	115:121	116:121	117:121	118:121	119:121
1	115.51	118.19	99.51	98.54	sp|P43320|CRBB2_HUMAN	Beta-crystallin B2 OS=Homo sapiens GN=CRYBB2 PE=1 SV=2	592	0.92045	0.972747	1.15878	1.03753	1.00925	1.08643	0.895365
2	123.1	123.04	99.6	94.84	sp|P53674|CRBB1_HUMAN	Beta-crystallin B1 OS=Homo sapiens GN=CRYBB1 PE=1 SV=2	511	0.619441	0.679204	0.765597	0.737904	0.660693	0.648634	0.794328
3	81.99	89.11	97.67	95.35	sp|P05813|CRBA1_HUMAN	Beta-crystallin A3 OS=Homo sapiens GN=CRYBA1 PE=1 SV=4	395	0.0398107	0.158489	0.258226	0.428549	0.0448745	0.0334195	0.440555
4	371.91	372.85	83.07	72.58	tr|A0A0D9SGF6|A0A0D9SGF6_HUMAN	Spectrin alpha chain, non-erythrocytic 1 OS=Homo sapiens GN=SPTAN1 PE=1 SV=1	370	8.70964	11.3763	9.0365	5.91562	14.9968	7.31139	7.72681
5	2	370.86	83.96	73.5	tr|A0A0D9SF54|A0A0D9SF54_HUMAN	Spectrin alpha chain, non-erythrocytic 1 OS=Homo sapiens GN=SPTAN1 PE=1 SV=1	368	2.65461	1.90546	1.25893	2.46604	3.94457	3.01995	1.14815
6	110.81	110.5	100	99.42	sp|P02489|CRYAA_HUMAN	Alpha-crystallin A chain OS=Homo sapiens GN=CRYAA PE=1 SV=2	350	0.981748	1.00925	1.15878	1.1695	0.954993	1.05682	1
7	91.63	91.74	100	100	tr|E9PR44|E9PR44_HUMAN	Alpha-crystallin B chain (Fragment) OS=Homo sapiens GN=CRYAB PE=1 SV=1	287	1	1.01859	1.11686	1.1272	0.92045	1.05682	0.990832
8	68.11	67.93	96.63	91.57	sp|P22914|CRBS_HUMAN	Beta-crystallin S OS=Homo sapiens GN=CRYGS PE=1 SV=4	256	0.0218776	0.0270396	0.0390841	0.285759	0.0642688	0.199526	0.401791
9	278.45	280.22	73.39	59.09	sp|Q01082|SPTB2_HUMAN	Spectrin beta chain, non-erythrocytic 1 OS=Homo sapiens GN=SPTBN1 PE=1 SV=2	247	0.625173	0.672977	0.0801678	2.0893	2.0893	2.07014	1.0666
10	67.81	68.01	96.94	96.43	sp|P53673|CRBA4_HUMAN	Beta-crystallin A4 OS=Homo sapiens GN=CRYBA4 PE=1 SV=3	234	0.0258226	0.0990832	0.387258	0.586138	0.113763	0.226986	0.401791
11	406.97	406.97	58.45	42.27	sp|Q15149|PLEC_HUMAN	Plectin OS=Homo sapiens GN=PLEC PE=1 SV=3	213	0.436516	1.5417	0.110662	1.97697	2.63027	4.32514	2.42103
12	48.36	48.38	98.85	87.93	sp|P07315|CRGC_HUMAN	Gamma-crystallin C OS=Homo sapiens GN=CRYGC PE=1 SV=2	187	0.0231206	0.0405509	0.0501187	0.237684	0.0331131	0.0963829	0.111686
13	307.33	306.54	68.52	55.72	sp|Q09666|AHNK_HUMAN	Neuroblast differentiation-associated protein AHNAK OS=Homo sapiens GN=AHNAK PE=1 SV=2	169	15.417	14.3219	4.83059	4.28549	10.3753	5.80764	3.16228
14	96.67	97.93	94.7	90.36	sp|Q13515|BFSP2_HUMAN	Phakinin OS=Homo sapiens GN=BFSP2 PE=1 SV=1	169	0.586138	0.515229	0.123595	0.816582	1.51356	1.5417	2.33346
15	90.82	92.74	84.98	73.82	sp|P08670|VIME_HUMAN	Vimentin OS=Homo sapiens GN=VIM PE=1 SV=4	169	4.20727	4.44631	2.93765	7.17794	24.6604	16.9044	1.87068
16	127.68	128.13	88.12	81.5	sp|Q12934|BFSP1_HUMAN	Filensin OS=Homo sapiens GN=BFSP1 PE=1 SV=3	156	1.24738	0.591562	0.187068	0.972747	2.91072	2.75423	2.91072
17	220.25	219.99	55.35	48.21	sp|P21333|FLNA_HUMAN	Filamin-A OS=Homo sapiens GN=FLNA PE=1 SV=4	149	1.87068	1.65959	0.187068	2.29087	3.22107	3.98107	1.08643
18	72.74	72.66	96.04	94.27	sp|P80723|BASP1_HUMAN	Brain acid soluble protein 1 OS=Homo sapiens GN=BASP1 PE=1 SV=2	139	6.79204	6.98232	6.66807	6.72977	0.597035	5.7544	4.09261
19	63.66	64.02	84.53	77.33	sp|P60709|ACTB_HUMAN	Actin, cytoplasmic 1 OS=Homo sapiens GN=ACTB PE=1 SV=1	135	0.534564	0.855067	0.195884	4.09261	1.23595	4.61318	2.42103
20	29.85	32.37	95.98	80.46	sp|P07320|CRGD_HUMAN	Gamma-crystallin D OS=Homo sapiens GN=CRYGD PE=1 SV=3	133	0.030479	0.0519996	0.0597035	0.17378	0.0180302	0.0731139	0.170608
21	64.95	64.6	75.05	65.87	sp|P00352|AL1A1_HUMAN	Retinal dehydrogenase 1 OS=Homo sapiens GN=ALDH1A1 PE=1 SV=2	89	0.0580764	0.115878	0.21677	0.474242	0.0912011	0.346737	0.758578
22	13.2	28.2	74.86	68.57	sp|P07316|CRGB_HUMAN	Gamma-crystallin B OS=Homo sapiens GN=CRYGB PE=1 SV=3	89	0.0376704	0.0816582	0.057544	0.130617	0.0356451	0.0452898	0.0717794
23	119.09	157.94	45.52	32.38	sp|O15020|SPTN2_HUMAN	Spectrin beta chain, non-erythrocytic 2 OS=Homo sapiens GN=SPTBN2 PE=1 SV=3	88	1.70608	1.36773	0.280543	2.91072	5.39511	5.44503	3.28095
24	5.72	37.02	83.29	46.15	sp|P68133|ACTS_HUMAN	Actin, alpha skeletal muscle OS=Homo sapiens GN=ACTA1 PE=1 SV=1	76	0.457088	0.724436	0.711214	2.93765	1.07647	3.76704	2.85759
25	103.86	105.94	26.61	15.19	sp|Q01484|ANK2_HUMAN	Ankyrin-2 OS=Homo sapiens GN=ANK2 PE=1 SV=4	74	2.60615	1.36773	0.214783	3.37287	5.64937	7.87046	3.01995
26	59.15	58.59	93.43	87.76	sp|P04406|G3P_HUMAN	Glyceraldehyde-3-phosphate dehydrogenase OS=Homo sapiens GN=GAPDH PE=1 SV=3	74	0.0436516	0.255859	0.847227	0.534564	0.120226	0.765597	0.37325
27	128.39	130.91	57.97	37.07	sp|O60437|PEPL_HUMAN	Periplakin OS=Homo sapiens GN=PPL PE=1 SV=4	73	8.70964	6.72977	0.816582	0.685488	6.48634	10.2802	3.31131
28	133.38	133.31	28.5	14.55	sp|Q14204|DYHC1_HUMAN	Cytoplasmic dynein 1 heavy chain 1 OS=Homo sapiens GN=DYNC1H1 PE=1 SV=5	69	0.270396	0.301995	0.0937562	1.78649	0.963829	1.8197	1.80302
29	31.11	31.27	93.36	73.46	sp|P26998|CRBB3_HUMAN	Beta-crystallin B3 OS=Homo sapiens GN=CRYBB3 PE=1 SV=4	65	0.765597	0.946237	1.77011	1.88799	0.717794	0.963829	0.496592
30	89.87	111.01	42.54	29.57	sp|P11277|SPTB1_HUMAN	Spectrin beta chain, erythrocytic OS=Homo sapiens GN=SPTB PE=1 SV=5	63	1.07647	0.654636	0.127057	1.31826	2.55859	1.99526	1.5417
31	22.7	23.41	85.79	72.59	sp|P53672|CRBA2_HUMAN	Beta-crystallin A2 OS=Homo sapiens GN=CRYBA2 PE=1 SV=3	61	0.879023	2.35505	3.80189	2.53513	3.98107	1.15878	1.97697
32	77.16	76.21	49.79	38.4	tr|C9JYY6|C9JYY6_HUMAN	Neuronal cell adhesion molecule OS=Homo sapiens GN=NRCAM PE=1 SV=3	60	14.0605	14.3219	10.8643	4.9204	13.4276	13.4276	2.51189
33	90.88	91.62	59.48	42.64	sp|Q9BXM0|PRAX_HUMAN	Periaxin OS=Homo sapiens GN=PRX PE=1 SV=2	55	12.3595	5.05825	1	10.4713	17.2187	18.0302	8.24138
34	55.54	55.54	86.05	76.23	sp|O75781|PALM_HUMAN	Paralemmin-1 OS=Homo sapiens GN=PALM PE=1 SV=2	54	19.7697	16.7494	13.0617	4.01791	10.9648	10.8643	1.52757
35	52.42	52.57	70.46	62.66	sp|P48637|GSHB_HUMAN	Glutathione synthetase OS=Homo sapiens GN=GSS PE=1 SV=1	53	0.0539511	0.11695	0.263027	0.301995	0.0190546	0.144544	0.57544
36	63.95	64.02	58.47	42.76	sp|P07900|HS90A_HUMAN	Heat shock protein HSP 90-alpha OS=Homo sapiens GN=HSP90AA1 PE=1 SV=5	52	0.554626	0.260615	0.149968	4.16869	0.334195	1.78649	1.13763
37	59.61	61.57	57.61	39.56	sp|P26232|CTNA2_HUMAN	Catenin alpha-2 OS=Homo sapiens GN=CTNNA2 PE=1 SV=5	48	4.28549	0.765597	0.187068	3.69828	3.59749	4.2462	0.937562
38	32.47	45.66	79.4	65.93	sp|P04075|ALDOA_HUMAN	Fructose-bisphosphate aldolase A OS=Homo sapiens GN=ALDOA PE=1 SV=2	47	0.0580764	0.331131	0.591562	0.534564	0.0691831	0.57544	1.03753
39	58.64	72.19	22.05	9.756	sp|Q12955|ANK3_HUMAN	Ankyrin-3 OS=Homo sapiens GN=ANK3 PE=1 SV=3	46	1.20226	1.25893	0.124738	1.23595	2.07014	1.8197	1.00925
40	26.35	27.96	92.2	82.93	sp|P04792|HSPB1_HUMAN	Heat shock protein beta-1 OS=Homo sapiens GN=HSPB1 PE=1 SV=2	46	1.2942	1.6293	1.87068	2.77971	0.280543	2.75423	0.251189
41	77.31	80.29	50.09	34.83	sp|P18206|VINC_HUMAN	Vinculin OS=Homo sapiens GN=VCL PE=1 SV=4	44	1.95884	0.77983	0.672977	1.52757	0.642688	1.10662	0.275423
42	52.76	54.42	49.77	34.84	sp|P11171|41_HUMAN	Protein 4.1 OS=Homo sapiens GN=EPB41 PE=1 SV=4	44	0.831764	0.57544	0.394457	1.47231	1.87068	2.80543	1.25893
43	50.86	52.02	49.22	42.08	sp|P04264|K2C1_HUMAN	Keratin, type II cytoskeletal 1 OS=Homo sapiens GN=KRT1 PE=1 SV=6	43	0.331131	0.413047	0.524807	1.11686	0.794328	1.15878	0.60256
44	44.96	45.99	77.46	66.43	sp|P00558|PGK1_HUMAN	Phosphoglycerate kinase 1 OS=Homo sapiens GN=PGK1 PE=1 SV=3	41	0.0679204	0.242103	0.539511	0.570164	0.185353	1.03753	1.31826
45	44.75	44.99	49.68	41.1	sp|P35222|CTNB1_HUMAN	Catenin beta-1 OS=Homo sapiens GN=CTNNB1 PE=1 SV=1	41	4.28549	1.11686	0.648634	2.60615	2.14783	3.56451	1.51356
46	44.64	44.32	80.53	58.7	sp|P07355|ANXA2_HUMAN	Annexin A2 OS=Homo sapiens GN=ANXA2 PE=1 SV=2	41	6.85488	2.14783	0.457088	8.3946	2.1677	3.53183	1.61436
47	35.56	36.77	40.73	30.57	sp|P19022|CADH2_HUMAN	Cadherin-2 OS=Homo sapiens GN=CDH2 PE=1 SV=4	41	8.24138	6.54636	1.97697	2.39883	3.87258	3.53183	1.57036
48	34.69	56.65	54.75	36.87	sp|P35221|CTNA1_HUMAN	Catenin alpha-1 OS=Homo sapiens GN=CTNNA1 PE=1 SV=1	40	14.4544	2.72898	0.698232	9.0365	16.9044	9.12011	3.37287
49	20.97	21.01	88.89	67.41	sp|P09382|LEG1_HUMAN	Galectin-1 OS=Homo sapiens GN=LGALS1 PE=1 SV=2	40	3.7325	2.77971	1.72187	10.3753	1.04713	6.0256	2.60615
50	60.03	59.66	60.66	48.18	sp|P26038|MOES_HUMAN	Moesin OS=Homo sapiens GN=MSN PE=1 SV=3	38	1.43219	2.83139	4.20727	2.60615	0.711214	6.30957	1.90546
51	13.7	52.78	55.94	37.02	sp|P08238|HS90B_HUMAN	Heat shock protein HSP 90-beta OS=Homo sapiens GN=HSP90AB1 PE=1 SV=4	38	0.147231	0.134276	0.0711213	1.55597	0.239883	1.25893	0.855067
52	49.86	49.82	55.88	38.39	sp|P11142|HSP7C_HUMAN	Heat shock cognate 71 kDa protein OS=Homo sapiens GN=HSPA8 PE=1 SV=1	37	0.92045	0.954993	0.366438	1.41906	3.49945	5.7544	1.7378
53	36.31	38.18	59.13	51.01	tr|H3BLU2|H3BLU2_HUMAN	Limbic system-associated membrane protein (Fragment) OS=Homo sapiens GN=LSAMP PE=1 SV=1	37	7.58578	7.37904	4.36516	1.39316	6.48634	5.29663	1.05682
54	44.88	48.34	70.24	51.22	sp|P14618|KPYM_HUMAN	Pyruvate kinase PKM OS=Homo sapiens GN=PKM PE=1 SV=4	36	0.636796	0.60256	0.199526	0.809096	0.291072	0.724436	1.22462
55	37.99	39.34	56.49	38.26	sp|P02768|ALBU_HUMAN	Serum albumin OS=Homo sapiens GN=ALB PE=1 SV=2	36	0.0862979	0.260615	4.2462	0.660693	0.0666807	0.175388	0.141906
56	58.49	58.97	43.78	30.15	sp|O43491|E41L2_HUMAN	Band 4.1-like protein 2 OS=Homo sapiens GN=EPB41L2 PE=1 SV=1	35	1.6293	1.92309	0.559758	3.04789	4.01791	7.7983	4.16869
57	45.79	45.76	78.57	67.03	sp|P09972|ALDOC_HUMAN	Fructose-bisphosphate aldolase C OS=Homo sapiens GN=ALDOC PE=1 SV=2	35	0.0862979	0.534564	0.794328	0.331131	0.135519	0.642688	0.895365
58	47.26	49.39	80.6	66.28	tr|B1ALY0|B1ALY0_HUMAN	Protein PALM2-AKAP2 (Fragment) OS=Homo sapiens GN=PALM2-AKAP2 PE=1 SV=1	34	18.3654	15.7036	6.98232	1.80302	25.3513	14.5881	4.57088
59	44.26	44.19	73.27	54.38	sp|P06733|ENOA_HUMAN	Alpha-enolase OS=Homo sapiens GN=ENO1 PE=1 SV=2	34	1.25893	0.698232	5.10505	5.64937	2.51189	5.19996	3.43558
60	53.29	53.28	54.8	37.37	sp|P11216|PYGB_HUMAN	Glycogen phosphorylase, brain form OS=Homo sapiens GN=PYGB PE=1 SV=5	33	0.263027	0.109648	0.092045	0.787046	0.0549541	0.510505	1.97697
61	2	53.21	40.17	30.75	tr|H0Y931|H0Y931_HUMAN	Ankyrin-2 (Fragment) OS=Homo sapiens GN=ANK2 PE=1 SV=1	33	0.758578	0.724436	0.879023	0.879023	1.02802	1.10662	1.0666
62	57.19	57.54	47.89	36.23	sp|P55072|TERA_HUMAN	Transitional endoplasmic reticulum ATPase OS=Homo sapiens GN=VCP PE=1 SV=4	32	3.59749	7.72681	8.01678	2.85759	5.64937	4.32514	0.946237
63	38.59	38.28	64.08	45.23	sp|Q71U36|TBA1A_HUMAN	Tubulin alpha-1A chain OS=Homo sapiens GN=TUBA1A PE=1 SV=1	32	0.554626	0.487529	0.855067	3.16228	1.83654	2.39883	3.7325
64	26.2	27.27	77.01	71.12	sp|P30086|PEBP1_HUMAN	Phosphatidylethanolamine-binding protein 1 OS=Homo sapiens GN=PEBP1 PE=1 SV=3	31	0.135519	0.487529	0.937562	0.316228	0.0625173	0.301995	0.334195
65	2.59	44.85	64.95	47.01	tr|H3BTN5|H3BTN5_HUMAN	Pyruvate kinase (Fragment) OS=Homo sapiens GN=PKM PE=1 SV=1	31	0.519996	0.255859	0.325087	0.887156	0.353183	0.440555	1.58489
66	31.72	31.74	99.35	96.75	sp|P00441|SODC_HUMAN	Superoxide dismutase [Cu-Zn] OS=Homo sapiens GN=SOD1 PE=1 SV=2	30	0.248886	0.642688	0.887156	0.903649	0.255859	0.544503	0.0630957
67	30.84	30.89	90.18	82.14	sp|P30041|PRDX6_HUMAN	Peroxiredoxin-6 OS=Homo sapiens GN=PRDX6 PE=1 SV=3	30	0.322107	0.185353	0.363078	1.83654	0.524807	2.07014	0.787046
68	29.27	29.28	62.39	51.58	sp|P07437|TBB5_HUMAN	Tubulin beta chain OS=Homo sapiens GN=TUBB PE=1 SV=2	30	7.24436	9.81748	0.672977	12.2462	22.9087	18.197	9.72747
69	54.86	54.87	29.84	16.97	tr|A0A087WVQ6|A0A087WVQ6_HUMAN	Clathrin heavy chain OS=Homo sapiens GN=CLTC PE=1 SV=1	29	0.870964	1.65959	0.272898	5.34564	2.72898	5.01187	3.87258
70	47.03	46.91	31.41	23.54	tr|H7BY57|H7BY57_HUMAN	Neurofascin (Fragment) OS=Homo sapiens GN=NFASC PE=1 SV=1	29	1.8197	1.1272	1.33045	0.787046	0.487529	1.21339	1.59956
71	44.9	46.89	30.19	21.67	sp|Q9BX66|SRBS1_HUMAN	Sorbin and SH3 domain-containing protein 1 OS=Homo sapiens GN=SORBS1 PE=1 SV=3	29	5.15229	1.2942	0.758578	0.787046	6.36796	3.94457	1.27057
72	43.39	43.3	78.75	68.75	sp|P08758|ANXA5_HUMAN	Annexin A5 OS=Homo sapiens GN=ANXA5 PE=1 SV=2	29	21.2814	4.36516	1.55597	27.2898	9.63829	10	5.01187
73	33.92	34.04	75.95	52.41	tr|A0A087X1N8|A0A087X1N8_HUMAN	Serpin B6 OS=Homo sapiens GN=SERPINB6 PE=1 SV=1	29	0.130617	0.1	0.175388	0.816582	0.301995	0.465586	0.474242
74	28.02	47.51	60.89	40.31	sp|P35241|RADI_HUMAN	Radixin OS=Homo sapiens GN=RDX PE=1 SV=1	29	6.98232	7.24436	8.87156	2.14783	4.28549	10.3753	2.31206
75	2	42.7	73.74	57.56	tr|C9JA33|C9JA33_HUMAN	Paralemmin-2 OS=Homo sapiens GN=PALM2 PE=1 SV=1	29	87.9023	87.9023	64.8634	49.6592	87.9023	87.0964	46.5586
76	29.75	32.42	72.83	58.96	sp|P04083|ANXA1_HUMAN	Annexin A1 OS=Homo sapiens GN=ANXA1 PE=1 SV=2	28	8.09096	2.1677	1.7378	7.04693	0.316228	0.870964	1.27057
77	8.71	8.94	73.91	57.39	sp|P14174|MIF_HUMAN	Macrophage migration inhibitory factor OS=Homo sapiens GN=MIF PE=1 SV=4	28	1.61436	1.18032	2.01372	0.704693	0.895365	0.744732	0.83946
78	2	46.66	26.78	20.6	tr|X6RKN2|X6RKN2_HUMAN	Neurofascin (Fragment) OS=Homo sapiens GN=NFASC PE=1 SV=1	28	1.78649	1.52757	1.24738	1.22462	1.5417	1.67494	0.990832
79	36.91	52.23	22.71	10.88	sp|O75369|FLNB_HUMAN	Filamin-B OS=Homo sapiens GN=FLNB PE=1 SV=2	27	0.847227	0.744732	0.608135	1.78649	1.47231	2.22844	0.981748
80	33.44	36.47	34.47	24.43	sp|Q14974|IMB1_HUMAN	Importin subunit beta-1 OS=Homo sapiens GN=KPNB1 PE=1 SV=2	27	0.328095	0.343558	0.263027	3.16228	0.698232	1.49968	1.95884
81	33.17	33.12	75.52	60.49	sp|P60174|TPIS_HUMAN	Triosephosphate isomerase OS=Homo sapiens GN=TPI1 PE=1 SV=3	27	1.1695	3.66438	8.09096	2.60615	1.14815	2.0893	0.981748
82	18.9	19.6	87.27	60	sp|P62937|PPIA_HUMAN	Peptidyl-prolyl cis-trans isomerase A OS=Homo sapiens GN=PPIA PE=1 SV=2	27	0.691831	1.77011	4.61318	1.52757	2.1677	2.93765	1.49968
83	27.89	27.99	52.06	41.45	sp|Q5TDP6|LGSN_HUMAN	Lengsin OS=Homo sapiens GN=LGSN PE=1 SV=1	27	0.285759	0.111686	0.328095	1.19124	0.177011	0.244343	0.534564
84	47.76	47.35	25.91	12.78	sp|Q7Z406|MYH14_HUMAN	Myosin-14 OS=Homo sapiens GN=MYH14 PE=1 SV=2	26	0.597035	1.80302	0.337287	1.69044	1.59956	2.46604	1.85353
85	38.61	40.66	35.04	25.61	sp|Q9Y2D5|AKAP2_HUMAN	A-kinase anchor protein 2 OS=Homo sapiens GN=AKAP2 PE=1 SV=3	26	4.36516	2.51189	1.18032	0.77983	9.37562	3.40408	2.31206
86	26.24	26.35	46.37	32.77	sp|O75131|CPNE3_HUMAN	Copine-3 OS=Homo sapiens GN=CPNE3 PE=1 SV=1	26	5.97035	1.61436	1.01859	10	1.6293	0.824138	0.47863
87	21.6	21.63	99.33	95.97	sp|P62158|CALM_HUMAN	Calmodulin OS=Homo sapiens GN=CALM1 PE=1 SV=2	26	14.3219	19.2309	20.3236	15.9956	4.9204	7.44732	1.57036
88	15.09	33.82	47.87	42.51	sp|P31150|GDIA_HUMAN	Rab GDP dissociation inhibitor alpha OS=Homo sapiens GN=GDI1 PE=1 SV=2	26	0.280543	0.190546	0.242103	1.21339	0.244343	0.831764	1.31826
89	46.9	47.19	47.91	34.21	tr|E9PDC3|E9PDC3_HUMAN	Armadillo repeat protein deleted in velo-cardio-facial syndrome OS=Homo sapiens GN=ARVCF PE=1 SV=1	25	1.97697	0.809096	0.133045	2.33346	5.10505	4.9204	2.37684
90	37.76	38.77	20.98	11.45	tr|E7EVA0|E7EVA0_HUMAN	Microtubule-associated protein OS=Homo sapiens GN=MAP4 PE=1 SV=1	25	1.38038	1.95884	0.972747	1.33045	3.0761	2.33346	1.10662
91	37.74	40.16	58.63	47.3	sp|P17987|TCPA_HUMAN	T-complex protein 1 subunit alpha OS=Homo sapiens GN=TCP1 PE=1 SV=1	25	0.591562	0.291072	0.328095	1.15878	0.187068	1.04713	1.11686
92	25.92	28.07	61.81	55.28	sp|Q8N126|CADM3_HUMAN	Cell adhesion molecule 3 OS=Homo sapiens GN=CADM3 PE=1 SV=1	25	11.695	11.0662	5.97035	5.15229	8.47227	9.12011	1.55597
93	23.6	24.31	62.46	42.02	sp|Q00796|DHSO_HUMAN	Sorbitol dehydrogenase OS=Homo sapiens GN=SORD PE=1 SV=4	25	0.140605	0.199526	0.401791	0.660693	0.109648	0.586138	1.10662
94	20.62	22.09	61.81	56.69	sp|P18669|PGAM1_HUMAN	Phosphoglycerate mutase 1 OS=Homo sapiens GN=PGAM1 PE=1 SV=2	25	0.169044	0.685488	1.2942	0.15417	0.0862979	0.416869	0.237684
95	4	23.16	51.01	40.9	sp|Q13885|TBB2A_HUMAN	Tubulin beta-2A chain OS=Homo sapiens GN=TUBB2A PE=1 SV=1	25	0.666807	0.801678	0.903649	0.912011	1.02802	0.954993	0.870964
96	2	25.2	55.51	43.6	sp|P68371|TBB4B_HUMAN	Tubulin beta-4B chain OS=Homo sapiens GN=TUBB4B PE=1 SV=1	25	0.972747	1.20226	0.711214	1.38038	2.88403	2.42103	1.19124
97	41.42	41.34	49.64	39.6	sp|P50990|TCPQ_HUMAN	T-complex protein 1 subunit theta OS=Homo sapiens GN=CCT8 PE=1 SV=4	24	2.58226	1.10662	0.515229	3.56451	1.99526	2.99226	1.87068
98	40.99	40.99	39.08	28.44	sp|Q14764|MVP_HUMAN	Major vault protein OS=Homo sapiens GN=MVP PE=1 SV=4	24	0.376704	0.21677	0.0879023	1.05682	0.263027	1	0.903649
99	27.07	27.19	74.37	66.06	sp|P16152|CBR1_HUMAN	Carbonyl reductase [NADPH] 1 OS=Homo sapiens GN=CBR1 PE=1 SV=3	24	0.122462	0.180302	0.288403	0.483059	0.105682	0.515229	0.744732
100	42.77	42.86	51.38	35.17	sp|P31948|STIP1_HUMAN	Stress-induced-phosphoprotein 1 OS=Homo sapiens GN=STIP1 PE=1 SV=1	23	0.704693	1.5417	2.22844	1.5417	0.801678	2.33346	0.660693
101	37.02	37.71	31.77	23.26	sp|P05023|AT1A1_HUMAN	Sodium/potassium-transporting ATPase subunit alpha-1 OS=Homo sapiens GN=ATP1A1 PE=1 SV=1	23	1.6293	0.248886	0.152757	4.40555	0.666807	1.27057	3.43558
102	35.65	40.05	51.22	36.7	sp|P11021|GRP78_HUMAN	78 kDa glucose-regulated protein OS=Homo sapiens GN=HSPA5 PE=1 SV=2	23	6.36796	5.10505	2.24905	1.33045	4.40555	1.51356	1.88799
103	34.32	42.47	46.01	35.99	sp|P35908|K22E_HUMAN	Keratin, type II cytoskeletal 2 epidermal OS=Homo sapiens GN=KRT2 PE=1 SV=2	23	0.0946237	0.313329	0.322107	1.00925	0.253513	0.474242	0.49204
104	25.46	26.16	97.04	80	sp|Q01469|FABP5_HUMAN	Fatty acid-binding protein, epidermal OS=Homo sapiens GN=FABP5 PE=1 SV=3	23	0.175388	0.428549	0.972747	0.457088	0.114815	0.356451	0.310456
105	24.92	25.94	54.93	39.2	sp|Q99733|NP1L4_HUMAN	Nucleosome assembly protein 1-like 4 OS=Homo sapiens GN=NAP1L4 PE=1 SV=1	23	4.7863	8.31764	8.31764	5.24807	2.33346	3.46737	1.18032
106	22.37	22.42	44.8	44.8	sp|P17931|LEG3_HUMAN	Galectin-3 OS=Homo sapiens GN=LGALS3 PE=1 SV=5	23	12.7057	12.5893	16.4437	7.65597	4.09261	1.30617	0.648634
107	17.29	28.96	63.27	54.69	sp|P63104|1433Z_HUMAN	14-3-3 protein zeta/delta OS=Homo sapiens GN=YWHAZ PE=1 SV=1	23	0.47863	0.349945	0.448745	1.44544	0.30761	0.92045	0.77983
108	10.22	26.82	58.11	42.79	sp|P04350|TBB4A_HUMAN	Tubulin beta-4A chain OS=Homo sapiens GN=TUBB4A PE=1 SV=2	23	5.64937	5.34564	4.32514	9.81748	10.666	10.0925	10.1859
109	7.16	36.75	77.89	51.23	sp|P06753|TPM3_HUMAN	Tropomyosin alpha-3 chain OS=Homo sapiens GN=TPM3 PE=1 SV=2	23	1.43219	2.39883	2.1677	0.483059	0.461318	0.409261	0.524807
110	2	16.15	78.79	62.12	tr|A0A087WWY4|A0A087WWY4_HUMAN	Paralemmin-1 OS=Homo sapiens GN=PALM PE=1 SV=1	23	2.22844	2.35505	1.97697	1.34276	1.59956	1.95884	0.758578
111	38.28	38.83	18.28	8.323	sp|P49327|FAS_HUMAN	Fatty acid synthase OS=Homo sapiens GN=FASN PE=1 SV=3	22	0.316228	0.343558	0.322107	1.0666	0.744732	1.20226	0.946237
112	37.44	38.9	80	52.63	tr|J3KN67|J3KN67_HUMAN	Tropomyosin alpha-3 chain OS=Homo sapiens GN=TPM3 PE=1 SV=1	22
113	34.15	36.23	30.54	18.41	sp|O00410|IPO5_HUMAN	Importin-5 OS=Homo sapiens GN=IPO5 PE=1 SV=4	22	0.524807	0.529663	0.0787046	2.05116	1.01859	0.912011	1.35519
114	32.76	35.66	38.61	21.05	sp|P14625|ENPL_HUMAN	Endoplasmin OS=Homo sapiens GN=HSP90B1 PE=1 SV=1	22	6.0256	2.22844	1	4.40555	14.3219	4.65586	2.88403
115	28.64	37.87	25.87	8.98	sp|P35579|MYH9_HUMAN	Myosin-9 OS=Homo sapiens GN=MYH9 PE=1 SV=4	22	0.57544	0.801678	0.666807	1.13763	0.428549	1.02802	0.963829
116	26.17	27.42	41.73	30.98	sp|P35527|K1C9_HUMAN	Keratin, type I cytoskeletal 9 OS=Homo sapiens GN=KRT9 PE=1 SV=3	22	0.387258	0.672977	0.816582	0.794328	0.963829	0.981748	0.544503
117	22.66	27.68	52.59	40	sp|Q08495|DEMA_HUMAN	Dematin OS=Homo sapiens GN=DMTN PE=1 SV=3	22	3.28095	1.61436	0.685488	0.855067	3.04789	2.12814	0.586138
118	4	39.35	35.7	24.42	tr|H0YJE6|H0YJE6_HUMAN	Spectrin beta chain, erythrocytic (Fragment) OS=Homo sapiens GN=SPTB PE=1 SV=1	22	1	0.862979	0.772681	1.01859	1.95884	1.22462	0.895365
119	37.79	37.83	35.74	23.17	tr|E9PLK3|E9PLK3_HUMAN	Puromycin-sensitive aminopeptidase OS=Homo sapiens GN=NPEPPS PE=1 SV=1	21	0.0544503	0.0744732	0.0394457	0.912011	0.113763	0.534564	1.2942
120	35.97	36.11	37.41	21.1	sp|P13639|EF2_HUMAN	Elongation factor 2 OS=Homo sapiens GN=EEF2 PE=1 SV=4	21	0.185353	0.177011	0.110662	1.43219	0.625173	0.831764	0.879023
121	33.79	35.86	50.11	36.18	sp|P50395|GDIB_HUMAN	Rab GDP dissociation inhibitor beta OS=Homo sapiens GN=GDI2 PE=1 SV=2	21	0.465586	0.316228	0.083946	2.208	0.630957	1.1695	1.47231
122	33.17	33.16	61.9	40.92	sp|P23141|EST1_HUMAN	Liver carboxylesterase 1 OS=Homo sapiens GN=CES1 PE=1 SV=2	21	5.01187	7.04693	8.47227	2.55859	1.39316	1.57036	2.46604
123	33.02	33.06	52.6	50.41	sp|P78310|CXAR_HUMAN	Coxsackievirus and adenovirus receptor OS=Homo sapiens GN=CXADR PE=1 SV=1	21	10.5682	12.5893	9.28966	5.7544	2.53513	3.90841	1.49968
124	30.1	32.72	37.3	24.83	tr|A0A087WX77|A0A087WX77_HUMAN	Neural cell adhesion molecule 1 OS=Homo sapiens GN=NCAM1 PE=1 SV=1	21	6.48634	2.35505	1.22462	2.39883	3.7325	2.24905	1.43219
125	28.61	29.61	53.5	39.86	sp|Q16555|DPYL2_HUMAN	Dihydropyrimidinase-related protein 2 OS=Homo sapiens GN=DPYSL2 PE=1 SV=1	21	1.43219	4.87528	6.91831	3.7325	2.85759	3.63078	1.67494
126	23.81	24.16	86.77	75.13	sp|Q99497|PARK7_HUMAN	Protein deglycase DJ-1 OS=Homo sapiens GN=PARK7 PE=1 SV=2	21	0.0698232	0.277971	0.401791	0.288403	0.0711213	0.258226	0.242103
127	35.45	36.94	54.66	42.03	tr|E7EMK3|E7EMK3_HUMAN	Flotillin-2 OS=Homo sapiens GN=FLOT2 PE=1 SV=1	20	2.77971	0.870964	0.544503	11.0662	2.33346	8.70964	4.61318
128	33.25	35.12	41.43	32.26	sp|P30153|2AAA_HUMAN	Serine/threonine-protein phosphatase 2A 65 kDa regulatory subunit A alpha isoform OS=Homo sapiens GN=PPP2R1A PE=1 SV=4	20	0.608135	0.461318	0.0765597	3.87258	1.02802	2.53513	2.07014
129	32.04	33.84	48.62	34.31	sp|P49368|TCPG_HUMAN	T-complex protein 1 subunit gamma OS=Homo sapiens GN=CCT3 PE=1 SV=4	20	0.529663	0.2208	0.0912011	1.07647	0.291072	0.586138	1.19124
130	31.28	31.7	45.43	34.03	sp|P29401|TKT_HUMAN	Transketolase OS=Homo sapiens GN=TKT PE=1 SV=3	20	0.194089	0.619441	0.765597	0.242103	0.143219	0.205116	0.448745
131	30.72	31.16	30.85	19.21	sp|O43707|ACTN4_HUMAN	Alpha-actinin-4 OS=Homo sapiens GN=ACTN4 PE=1 SV=2	20	1.07647	0.698232	0.246604	1.39316	1.65959	1.67494	0.870964
132	29.52	30.33	35.35	25.32	sp|O14639|ABLM1_HUMAN	Actin-binding LIM protein 1 OS=Homo sapiens GN=ABLIM1 PE=1 SV=3	20	2.48886	1.21339	0.539511	0.963829	5.34564	3.31131	1.43219
133	28.88	29.02	36.63	24.87	tr|A0A0A0MS51|A0A0A0MS51_HUMAN	Gelsolin OS=Homo sapiens GN=GSN PE=1 SV=1	20	5.19996	1.25893	0.794328	3.49945	2.55859	5.19996	1.35519
134	27.69	27.69	70.98	56.47	sp|P62258|1433E_HUMAN	14-3-3 protein epsilon OS=Homo sapiens GN=YWHAE PE=1 SV=1	20	0.187068	0.416869	0.724436	1.2942	0.248886	0.666807	0.630957
135	26.82	27.01	43.69	26.18	sp|P40227|TCPZ_HUMAN	T-complex protein 1 subunit zeta OS=Homo sapiens GN=CCT6A PE=1 SV=3	20	1.78649	0.597035	0.49204	2.70396	1.04713	1.99526	1.45881
136	26.12	26.2	64.46	51.81	sp|P00338|LDHA_HUMAN	L-lactate dehydrogenase A chain OS=Homo sapiens GN=LDHA PE=1 SV=2	20	0.165959	0.2208	0.0515229	1.97697	0.963829	1.36773	2.12814
137	19.76	20.07	34.52	25.25	tr|A0A0A0MTR1|A0A0A0MTR1_HUMAN	Cadherin-13 OS=Homo sapiens GN=CDH13 PE=1 SV=2	20	6.91831	5.64937	2.65461	2.80543	4.40555	2.42103	2.18776
138	5.4	33.3	84.91	56.9	tr|Q5HYB6|Q5HYB6_HUMAN	Epididymis luminal protein 189 OS=Homo sapiens GN=DKFZp686J1372 PE=1 SV=1	20	1.10662	2.37684	1.94089	0.496592	0.711214	0.483059	0.444631
139	30.12	30.2	34.36	24.87	sp|P17858|PFKAL_HUMAN	ATP-dependent 6-phosphofructokinase, liver type OS=Homo sapiens GN=PFKL PE=1 SV=6	19	0.140605	0.356451	0.122462	0.879023	0.177011	0.737904	1.21339
140	29.22	31	46.17	36.64	sp|P78371|TCPB_HUMAN	T-complex protein 1 subunit beta OS=Homo sapiens GN=CCT2 PE=1 SV=4	19	0.887156	0.275423	0.102802	1.24738	0.452898	1.10662	1.48594
141	27.53	29.74	19.45	9.161	sp|Q5T5P2|SKT_HUMAN	Sickle tail protein homolog OS=Homo sapiens GN=KIAA1217 PE=1 SV=2	19	4.13048	2.29087	1.5417	1.14815	12.0226	8.31764	2.208
142	27.39	28.74	38.21	30.51	sp|Q16643|DREB_HUMAN	Drebrin OS=Homo sapiens GN=DBN1 PE=1 SV=4	19	2.63027	1.78649	0.855067	1.70608	4.65586	4.83059	1.39316
143	24.43	27.26	24.8	11.06	sp|Q86VP6|CAND1_HUMAN	Cullin-associated NEDD8-dissociated protein 1 OS=Homo sapiens GN=CAND1 PE=1 SV=2	19	0.237684	0.334195	0.143219	1.80302	0.619441	1.1695	1.75388
144	22.95	23.24	63.86	56.93	sp|Q53FA7|QORX_HUMAN	Quinone oxidoreductase PIG3 OS=Homo sapiens GN=TP53I3 PE=1 SV=2	19	0.322107	0.903649	1.05682	1.01859	0.334195	0.340408	0.787046
145	20.11	22.24	38.62	31.03	sp|Q8N3J6|CADM2_HUMAN	Cell adhesion molecule 2 OS=Homo sapiens GN=CADM2 PE=2 SV=1	19	14.0605	14.4544	11.8032	5.80764	7.72681	9.2045	4.13048
146	15.5	27.66	44.55	27.41	tr|A0A0G2JIW1|A0A0G2JIW1_HUMAN	Heat shock 70 kDa protein 1B OS=Homo sapiens GN=HSPA1B PE=4 SV=1	19	0.937562	1.24738	1.90546	2.60615	5.70164	7.37904	0.887156
147	2.33	31.48	34.53	20.97	tr|A0A087WZ65|A0A087WZ65_HUMAN	Ankyrin-3 (Fragment) OS=Homo sapiens GN=ANK3 PE=1 SV=1	19	1.00925	1.14815	1.10662	0.855067	1.48594	0.990832	0.765597
148	33.62	33.97	28.78	16.03	sp|Q8NHU6|TDRD7_HUMAN	Tudor domain-containing protein 7 OS=Homo sapiens GN=TDRD7 PE=1 SV=2	18	0.630957	0.879023	0.2208	2.75423	6.91831	2.96483	3.01995
149	30.75	30.7	44.66	31.07	sp|P11413|G6PD_HUMAN	Glucose-6-phosphate 1-dehydrogenase OS=Homo sapiens GN=G6PD PE=1 SV=4	18	0.199526	0.448745	0.691831	1.0666	0.267917	0.765597	1.20226
150	30.24	31.83	24.1	18.15	sp|P22314|UBA1_HUMAN	Ubiquitin-like modifier-activating enzyme 1 OS=Homo sapiens GN=UBA1 PE=1 SV=3	18	0.340408	0.744732	0.0895365	2.67917	1.39316	2.42103	1.94089
151	28.4	35.42	39.46	26.71	sp|P14923|PLAK_HUMAN	Junction plakoglobin OS=Homo sapiens GN=JUP PE=1 SV=3	18	2.10863	1.05682	0.954993	1.39316	4.52898	2.91072	1.94089
152	28.12	31.25	31.54	23.42	sp|P35612|ADDB_HUMAN	Beta-adducin OS=Homo sapiens GN=ADD2 PE=1 SV=3	18	2.208	0.946237	0.207014	1.38038	4.61318	2.83139	1.65959
153	27.77	31.91	38.44	25.33	sp|P38646|GRP75_HUMAN	Stress-70 protein, mitochondrial OS=Homo sapiens GN=HSPA9 PE=1 SV=2	18	1.95884	1.05682	1.0666	1.23595	3.01995	1.11686	1.19124
154	27.13	27.18	52.53	44.7	sp|O60664|PLIN3_HUMAN	Perilipin-3 OS=Homo sapiens GN=PLIN3 PE=1 SV=3	18	2.14783	2.1677	1.31826	0.717794	3.28095	2.24905	1.2942
155	25.1	28.65	24.76	11.39	tr|E7EX90|E7EX90_HUMAN	Dynactin subunit 1 OS=Homo sapiens GN=DCTN1 PE=1 SV=1	18	2.42103	3.49945	0.954993	3.0761	3.80189	5.44503	3.53183
156	21.91	23.99	42.47	22.09	sp|P13645|K1C10_HUMAN	Keratin, type I cytoskeletal 10 OS=Homo sapiens GN=KRT10 PE=1 SV=6	18	0.192309	0.283139	0.188799	1.01859	0.387258	0.580764	0.440555
157	20.97	22.58	42.83	29.1	sp|P20073|ANXA7_HUMAN	Annexin A7 OS=Homo sapiens GN=ANXA7 PE=1 SV=3	18	5.80764	2.70396	1.34276	13.6773	4.52898	2.03236	1.70608
158	17.37	17.46	78.48	60.54	sp|P09936|UCHL1_HUMAN	Ubiquitin carboxyl-terminal hydrolase isozyme L1 OS=Homo sapiens GN=UCHL1 PE=1 SV=2	18	0.0847227	0.140605	0.11272	0.448745	0.125893	0.564937	0.405509
159	17.08	17.11	72.22	60.61	sp|P30626|SORCN_HUMAN	Sorcin OS=Homo sapiens GN=SRI PE=1 SV=1	18	3.87258	3.28095	3.80189	3.25087	0.679204	0.128233	0.510505
160	16.31	26.44	67.89	50.41	sp|Q04917|1433F_HUMAN	14-3-3 protein eta OS=Homo sapiens GN=YWHAH PE=1 SV=4	18	1.03753	0.816582	0.253513	3.34195	3.04789	3.16228	1.85353
161	29.71	29.91	51.09	34.46	sp|P30101|PDIA3_HUMAN	Protein disulfide-isomerase A3 OS=Homo sapiens GN=PDIA3 PE=1 SV=4	17	6.98232	4.44631	0.613762	3.43558	10.8643	4.87528	2.65461
162	27.53	27.68	53.28	36.75	sp|P10644|KAP0_HUMAN	cAMP-dependent protein kinase type I-alpha regulatory subunit OS=Homo sapiens GN=PRKAR1A PE=1 SV=1	17	5.39511	2.75423	0.60256	6.66807	10.1859	9.63829	6.98232
163	24.93	27.25	26.93	13.98	sp|P01023|A2MG_HUMAN	Alpha-2-macroglobulin OS=Homo sapiens GN=A2M PE=1 SV=3	17	0.0432514	0.0346737	0.0428549	0.505825	0.030761	0.376704	0.0937562
164	19.38	21.46	39.2	26.73	sp|P10909|CLUS_HUMAN	Clusterin OS=Homo sapiens GN=CLU PE=1 SV=1	17	2.48886	3.22107	2.91072	0.855067	3.01995	1.87068	1.51356
165	19.02	19.57	48.39	36.77	sp|Q9BX67|JAM3_HUMAN	Junctional adhesion molecule C OS=Homo sapiens GN=JAM3 PE=1 SV=1	17	11.4815	10.4713	6.08135	3.80189	3.46737	8.09096	5.05825
166	16.79	17	60.94	50.78	sp|P62987|RL40_HUMAN	Ubiquitin-60S ribosomal protein L40 OS=Homo sapiens GN=UBA52 PE=1 SV=2	17	0.691831	0.816582	0.937562	0.428549	0.0394457	0.265461	0.237684
167	12.99	31.41	34.1	17.1	tr|A0A0A0MRA8|A0A0A0MRA8_HUMAN	Band 4.1-like protein 3 OS=Homo sapiens GN=EPB41L3 PE=1 SV=1	17	1.21339	1.41906	1.00925	0.751623	3.43558	2.72898	0.990832
168	10	17.67	79.89	44.25	sp|P11844|CRGA_HUMAN	Gamma-crystallin A OS=Homo sapiens GN=CRYGA PE=2 SV=3	17	0.328095	0.37325	0.353183	1.95884	0.816582	0.636796	0.534564
169	9.33	9.52	84.78	79.35	sp|P04271|S100B_HUMAN	Protein S100-B OS=Homo sapiens GN=S100B PE=1 SV=2	17	2.0893	2.14783	3.31131	5.34564	0.138038	0.92045	0.444631
170	30.24	30.27	36.14	27.71	sp|P38606|VATA_HUMAN	V-type proton ATPase catalytic subunit A OS=Homo sapiens GN=ATP6V1A PE=1 SV=2	16	0.296483	0.270396	0.405509	0.751623	0.214783	0.625173	1.10662
171	30.06	30.16	24.39	13.25	sp|Q16531|DDB1_HUMAN	DNA damage-binding protein 1 OS=Homo sapiens GN=DDB1 PE=1 SV=1	16	0.244343	0.222844	0.118032	1.15878	0.296483	0.672977	1.20226
172	28.55	28.59	42.36	32.41	sp|P23526|SAHH_HUMAN	Adenosylhomocysteinase OS=Homo sapiens GN=AHCY PE=1 SV=4	16	0.0824138	0.138038	0.248886	0.30761	0.100925	0.255859	0.496592
173	28.39	30.36	33.86	22.05	sp|Q6UWM7|LCTL_HUMAN	Lactase-like protein OS=Homo sapiens GN=LCTL PE=1 SV=2	16	1.2942	1.33045	0.515229	4.52898	3.98107	19.5884	7.11213
174	28.36	28.7	73.36	59.46	sp|P07738|PMGE_HUMAN	Bisphosphoglycerate mutase OS=Homo sapiens GN=BPGM PE=1 SV=2	16	0.0613762	0.110662	0.205116	0.242103	0.0394457	0.231206	0.135519
175	27.72	27.76	46.32	38.32	sp|Q96KP4|CNDP2_HUMAN	Cytosolic non-specific dipeptidase OS=Homo sapiens GN=CNDP2 PE=1 SV=2	16	0.416869	1.94089	2.31206	0.981748	0.416869	0.685488	0.625173
176	25.7	27.23	37.99	25	sp|P07237|PDIA1_HUMAN	Protein disulfide-isomerase OS=Homo sapiens GN=P4HB PE=1 SV=3	16	12.5893	6.0256	0.765597	2.31206	10.4713	4.7863	3.53183
177	24.52	26.49	64.91	49.82	sp|O94760|DDAH1_HUMAN	N(G),N(G)-dimethylarginine dimethylaminohydrolase 1 OS=Homo sapiens GN=DDAH1 PE=1 SV=3	16	5.10505	6.98232	8.55067	2.96483	3.13329	8.95365	4.28549
178	24.12	24.19	37.68	30.23	sp|P52209|6PGD_HUMAN	6-phosphogluconate dehydrogenase, decarboxylating OS=Homo sapiens GN=PGD PE=1 SV=3	16	0.158489	0.201372	0.0660693	0.937562	0.376704	0.787046	1.23595
179	23.06	27.13	59.92	48.18	sp|P61981|1433G_HUMAN	14-3-3 protein gamma OS=Homo sapiens GN=YWHAG PE=1 SV=2	16	0.322107	0.161436	0.205116	2.0893	0.366438	1.09648	1.08643
180	21.96	22.32	46.8	34.73	sp|Q93088|BHMT1_HUMAN	Betaine--homocysteine S-methyltransferase 1 OS=Homo sapiens GN=BHMT PE=1 SV=2	16	0.0356451	0.0972747	0.049204	1.03753	0.0226986	0.946237	0.109648
181	21.1	31.32	40.23	20.11	tr|A0A0C4DH22|A0A0C4DH22_HUMAN	Band 4.1-like protein 1 OS=Homo sapiens GN=EPB41L1 PE=1 SV=1	16	5.80764	4.7863	5.15229	2.44343	11.695	3.56451	3.63078
182	18.41	18.55	70.35	45.73	sp|Q06830|PRDX1_HUMAN	Peroxiredoxin-1 OS=Homo sapiens GN=PRDX1 PE=1 SV=1	16	3.63078	6.19441	12.5893	1.03753	0.816582	2.39883	1.35519
183	12.41	14.62	43.01	22.38	tr|H7BY58|H7BY58_HUMAN	Protein-L-isoaspartate O-methyltransferase OS=Homo sapiens GN=PCMT1 PE=1 SV=1	16	0.0895365	0.109648	0.155597	0.152757	0.0887156	0.313329	0.586138
184	8.05	21.18	60.98	51.22	sp|P31946|1433B_HUMAN	14-3-3 protein beta/alpha OS=Homo sapiens GN=YWHAB PE=1 SV=3	16	2.53513	1.38038	2.51189	5.24807	2.72898	2.77971	1.36773
185	4.02	12.12	13.76	1.172	tr|H3BQK9|H3BQK9_HUMAN	Microtubule-actin cross-linking factor 1, isoforms 1/2/3/5 OS=Homo sapiens GN=MACF1 PE=1 SV=1	16	1.18032	0.83946	0.879023	0.847227	1.1272	0.758578	0.937562
186	2.26	31.25	47.46	26.57	tr|A0A0D9SG07|A0A0D9SG07_HUMAN	Band 4.1-like protein 1 OS=Homo sapiens GN=EPB41L1 PE=1 SV=1	16	6.60693	15.8489	12.7057	1.18032	10.1859	6.66807	4.96592
187	27.29	29.54	41.77	26.62	sp|P48643|TCPE_HUMAN	T-complex protein 1 subunit epsilon OS=Homo sapiens GN=CCT5 PE=1 SV=1	15	2.33346	0.586138	0.288403	4.13048	0.597035	3.19154	2.67917
188	24.58	24.59	35.17	23.94	sp|Q99832|TCPH_HUMAN	T-complex protein 1 subunit eta OS=Homo sapiens GN=CCT7 PE=1 SV=2	15	0.963829	0.2208	0.37325	1.5417	0.444631	0.928966	1.48594
189	23.7	24.1	46.13	38.95	tr|E7EQG2|E7EQG2_HUMAN	Eukaryotic initiation factor 4A-II OS=Homo sapiens GN=EIF4A2 PE=1 SV=1	15	0.296483	0.387258	0.0666807	1.02802	0.214783	0.794328	1.21339
190	23.45	25.81	38.71	17.78	sp|Q05682|CALD1_HUMAN	Caldesmon OS=Homo sapiens GN=CALD1 PE=1 SV=3	15	4.05509	4.13048	2.29087	1.65959	4.57088	1.38038	1.18032
191	22.42	22.45	73.56	56.25	sp|P20340|RAB6A_HUMAN	Ras-related protein Rab-6A OS=Homo sapiens GN=RAB6A PE=1 SV=3	15	0.597035	1	1.07647	3.83707	0.11272	1.14815	2.72898
192	19.12	19.41	40.65	24.02	sp|P48165|CXA8_HUMAN	Gap junction alpha-8 protein OS=Homo sapiens GN=GJA8 PE=1 SV=3	15	1.22462	0.405509	0.288403	0.169044	2.60615	2.14783	0.946237
193	18.28	21.67	32.97	19.54	sp|P35611|ADDA_HUMAN	Alpha-adducin OS=Homo sapiens GN=ADD1 PE=1 SV=2	15	4.16869	5.64937	1.44544	4.7863	10.4713	4.7863	2.67917
194	14.12	28.46	46.01	24.57	sp|P54652|HSP72_HUMAN	Heat shock-related 70 kDa protein 2 OS=Homo sapiens GN=HSPA2 PE=1 SV=1	15	1.83654	2.24905	1.39316	1.48594	1.92309	2.07014	0.717794
195	9.96	26.93	31.84	15.47	sp|P12814|ACTN1_HUMAN	Alpha-actinin-1 OS=Homo sapiens GN=ACTN1 PE=1 SV=2	15	0.83946	0.608135	0.515229	1.34276	1.0666	1.69044	0.855067
196	7.32	7.41	50.34	40.14	sp|Q9Y2V2|CHSP1_HUMAN	Calcium-regulated heat stable protein 1 OS=Homo sapiens GN=CARHSP1 PE=1 SV=2	15	1.52757	3.0761	4.44631	0.737904	1.6293	1.57036	1.77011
197	6.61	22.06	21.26	5.921	sp|P35580|MYH10_HUMAN	Myosin-10 OS=Homo sapiens GN=MYH10 PE=1 SV=3	15	0.831764	0.724436	0.544503	1.92309	0.879023	0.954993	0.972747
198	24.6	25.62	56.44	39.34	sp|O75955|FLOT1_HUMAN	Flotillin-1 OS=Homo sapiens GN=FLOT1 PE=1 SV=3	15	0.816582	0.242103	0.151356	5.19996	1.09648	3.90841	2.10863
199	24.9	24.94	47.86	44.39	sp|Q6P6B1|ERIC5_HUMAN	Glutamate-rich protein 5 OS=Homo sapiens GN=ERICH5 PE=2 SV=1	14	4.28549	5.44503	5.19996	1.2942	2.14783	1.35519	0.765597
200	24.24	26.3	20.43	15.66	sp|P05556|ITB1_HUMAN	Integrin beta-1 OS=Homo sapiens GN=ITGB1 PE=1 SV=2	14	10.4713	9.81748	5.70164	4.44631	7.51623	2.83139	2.05116
201	23.66	23.83	49.87	36.9	tr|A0A0B4J1R4|A0A0B4J1R4_HUMAN	4-hydroxyphenylpyruvate dioxygenase OS=Homo sapiens GN=HPD PE=1 SV=1	14	0.0711213	0.169044	0.155597	0.159956	0.0398107	0.251189	0.972747
202	23.47	25.61	27.76	13.13	sp|Q8WUM4|PDC6I_HUMAN	Programmed cell death 6-interacting protein OS=Homo sapiens GN=PDCD6IP PE=1 SV=1	14	1.5417	0.862979	0.539511	2.24905	2.37684	1.87068	1.75388
203	22.26	26.71	54.15	38.71	sp|P09104|ENOG_HUMAN	Gamma-enolase OS=Homo sapiens GN=ENO2 PE=1 SV=3	14	0.37325	0.420727	0.92045	0.387258	0.253513	0.515229	0.691831
204	21.41	21.45	45.51	33.65	sp|P22748|CAH4_HUMAN	Carbonic anhydrase 4 OS=Homo sapiens GN=CA4 PE=1 SV=2	14	14.5881	13.3045	13.6773	6.85488	0.570164	10.0925	6.48634
205	18.25	18.51	31.24	19.55	sp|P10809|CH60_HUMAN	60 kDa heat shock protein, mitochondrial OS=Homo sapiens GN=HSPD1 PE=1 SV=2	14	4.28549	1.41906	0.469894	2.65461	8.09096	3.43558	2.55859
206	18.07	21.87	44.29	30.82	tr|D6RFN0|D6RFN0_HUMAN	COP9 signalosome complex subunit 4 OS=Homo sapiens GN=COPS4 PE=1 SV=1	14	0.331131	0.440555	0.346737	1.77011	0.57544	1.23595	1.13763
207	18.01	18.05	51.27	49.24	tr|A0A0A0MQT0|A0A0A0MQT0_HUMAN	Retinol binding protein 1, cellular OS=Homo sapiens GN=RBP1 PE=1 SV=1	14	0.679204	2.12814	2.91072	1.01859	0.679204	1.49968	1.09648
208	17.51	18.31	40.39	27.09	sp|P00738|HPT_HUMAN	Haptoglobin OS=Homo sapiens GN=HP PE=1 SV=1	14	0.0559758	0.0660693	0.291072	1.35519	0.0233346	0.77983	0.102802
209	17.3	25.49	38.78	22.08	sp|P50991|TCPD_HUMAN	T-complex protein 1 subunit delta OS=Homo sapiens GN=CCT4 PE=1 SV=4	14	2.83139	1.80302	1.43219	3.40408	2.48886	2.85759	2.42103
210	15.59	18.93	28.47	22.59	sp|P22234|PUR6_HUMAN	Multifunctional protein ADE2 OS=Homo sapiens GN=PAICS PE=1 SV=3	14	0.376704	0.505825	0.416869	1.13763	0.260615	1.04713	0.903649
211	15.14	24.46	70.56	39.92	tr|H7BYY1|H7BYY1_HUMAN	Tropomyosin 1 (Alpha), isoform CRA_m OS=Homo sapiens GN=TPM1 PE=1 SV=1	14	4.05509	6.36796	6.85488	2.05116	2.67917	1.27057	0.586138
212	2	24.66	45.92	26.64	tr|B2RB02|B2RB02_HUMAN	Band 4.1-like protein 3 OS=Homo sapiens GN=EPB41L3 PE=1 SV=1	14	0.679204	0.685488	0.672977	0.831764	0.744732	0.954993	1
213	26.92	26.92	33.52	21.49	sp|P02787|TRFE_HUMAN	Serotransferrin OS=Homo sapiens GN=TF PE=1 SV=3	13	0.0912011	0.11695	0.285759	0.613762	0.101859	0.340408	0.049204
214	22.9	23.01	43.09	30.85	sp|P50453|SPB9_HUMAN	Serpin B9 OS=Homo sapiens GN=SERPINB9 PE=1 SV=1	13	0.199526	0.214783	0.275423	1.20226	0.293765	0.613762	0.972747
215	21.98	22.95	32.25	16.06	sp|P19338|NUCL_HUMAN	Nucleolin OS=Homo sapiens GN=NCL PE=1 SV=3	13	6.66807	4.36516	6.42688	2.53513	6.0256	2.39883	2.12814
216	20.52	21.62	27.39	17.66	sp|O75083|WDR1_HUMAN	WD repeat-containing protein 1 OS=Homo sapiens GN=WDR1 PE=1 SV=4	13	0.265461	0.270396	0.122462	0.544503	0.251189	0.349945	1.18032
217	19.97	21.18	42.64	22.19	sp|Q13561|DCTN2_HUMAN	Dynactin subunit 2 OS=Homo sapiens GN=DCTN2 PE=1 SV=4	13	5.44503	7.31139	7.94328	2.29087	2.12814	1.44544	2.12814
218	19.89	20.18	30.45	20	sp|P34913|HYES_HUMAN	Bifunctional epoxide hydrolase 2 OS=Homo sapiens GN=EPHX2 PE=1 SV=2	13	0.291072	0.207014	0.359749	0.981748	0.413047	1.15878	1.04713
219	19.65	19.7	49.4	38.66	sp|P16930|FAAA_HUMAN	Fumarylacetoacetase OS=Homo sapiens GN=FAH PE=1 SV=2	13	0.187068	0.18197	0.319154	0.293765	0.0698232	0.144544	0.496592
220	19.35	19.36	33.19	30.57	sp|P09497|CLCB_HUMAN	Clathrin light chain B OS=Homo sapiens GN=CLTB PE=1 SV=1	13	7.72681	11.9124	13.4276	2.85759	1.48594	1.51356	1.80302
221	19.26	19.43	40.84	25.89	sp|Q01518|CAP1_HUMAN	Adenylyl cyclase-associated protein 1 OS=Homo sapiens GN=CAP1 PE=1 SV=5	13	4.40555	3.13329	1.23595	6.36796	4.65586	5.70164	6.36796
222	19.14	19.53	16.57	6.676	sp|Q58EX2|SDK2_HUMAN	Protein sidekick-2 OS=Homo sapiens GN=SDK2 PE=1 SV=3	13	1.78649	0.895365	1.01859	0.937562	2.0893	1.03753	1.15878
223	18.65	20.02	73.49	59.04	sp|P23528|COF1_HUMAN	Cofilin-1 OS=Homo sapiens GN=CFL1 PE=1 SV=3	13	15.2757	15.8489	8.62979	10.7647	20.5116	18.3654	12.8233
224	18.64	18.96	63.76	50.92	sp|Q15907|RB11B_HUMAN	Ras-related protein Rab-11B OS=Homo sapiens GN=RAB11B PE=1 SV=4	13	0.879023	0.666807	0.737904	1.75388	0.711214	0.765597	1.67494
225	18.52	19.42	37.52	19.2	tr|A0A0A0MTS2|A0A0A0MTS2_HUMAN	Glucose-6-phosphate isomerase (Fragment) OS=Homo sapiens GN=GPI PE=1 SV=1	13	0.110662	0.301995	0.452898	1.10662	0.630957	0.981748	0.765597
226	18.09	20.44	38.99	21.68	sp|P48163|MAOX_HUMAN	NADP-dependent malic enzyme OS=Homo sapiens GN=ME1 PE=1 SV=1	13	0.102802	0.105682	0.0380189	0.363078	0.0672977	0.383707	1.30617
227	17.46	24.43	32.81	22.11	tr|E9PD68|E9PD68_HUMAN	Dihydropyrimidinase-related protein 1 OS=Homo sapiens GN=CRMP1 PE=1 SV=1	13	0.515229	1.85353	2.93765	1.2942	1.21339	1.41906	1.1695
228	13.84	19.58	28.87	21.24	sp|P51648|AL3A2_HUMAN	Fatty aldehyde dehydrogenase OS=Homo sapiens GN=ALDH3A2 PE=1 SV=1	13	11.0662	11.0662	11.4815	3.90841	9.28966	3.0761	1.08643
229	13.68	13.86	74.04	64.42	sp|P61457|PHS_HUMAN	Pterin-4-alpha-carbinolamine dehydratase OS=Homo sapiens GN=PCBD1 PE=1 SV=2	13	0.0337287	0.111686	0.148594	0.110662	0.0251189	0.140605	0.444631
230	12.26	13.58	29.67	23.74	sp|Q9ULX7|CAH14_HUMAN	Carbonic anhydrase 14 OS=Homo sapiens GN=CA14 PE=1 SV=1	13	4.65586	3.16228	2.58226	2.0893	1.24738	2.83139	1.24738
231	8.04	18.95	24.66	11.48	tr|E9PK47|E9PK47_HUMAN	Alpha-1,4 glucan phosphorylase OS=Homo sapiens GN=PYGL PE=1 SV=1	13	0.448745	0.16293	0.155597	0.625173	0.0570164	0.704693	1.35519
232	2	18.96	74.07	61.11	sp|P62491|RB11A_HUMAN	Ras-related protein Rab-11A OS=Homo sapiens GN=RAB11A PE=1 SV=3	13
233	23.14	23.18	70.83	42.59	sp|P23284|PPIB_HUMAN	Peptidyl-prolyl cis-trans isomerase B OS=Homo sapiens GN=PPIB PE=1 SV=2	12	17.0608	14.9968	19.7697	4.69894	19.5884	7.37904	3.22107
234	20.07	20.18	39.09	23.09	sp|Q14247|SRC8_HUMAN	Src substrate cortactin OS=Homo sapiens GN=CTTN PE=1 SV=2	12	2.05116	1.87068	1.23595	1.03753	2.1677	2.18776	1.22462
235	19.21	21.96	28.93	14.05	sp|P34932|HSP74_HUMAN	Heat shock 70 kDa protein 4 OS=Homo sapiens GN=HSPA4 PE=1 SV=4	12	0.440555	0.57544	0.544503	1.24738	0.691831	1.49968	1.2942
236	18.72	18.83	46.6	31.48	sp|Q9NUQ9|FA49B_HUMAN	Protein FAM49B OS=Homo sapiens GN=FAM49B PE=1 SV=1	12	0.751623	0.387258	0.149968	2.53513	2.85759	2.48886	1.36773
237	17.48	17.5	57.29	53.27	sp|P37802|TAGL2_HUMAN	Transgelin-2 OS=Homo sapiens GN=TAGLN2 PE=1 SV=3	12	1.97697	4.16869	1.7378	2.26986	5.64937	2.07014	2.58226
238	16.58	16.77	45.93	26.56	tr|A0A024R6I7|A0A024R6I7_HUMAN	Alpha-1-antitrypsin OS=Homo sapiens GN=SERPINA1 PE=3 SV=1	12	0.0210863	0.0398107	0.0597035	1.27057	0.0165959	1.27057	0.159956
239	16.49	16.56	40	26.33	sp|O15144|ARPC2_HUMAN	Actin-related protein 2/3 complex subunit 2 OS=Homo sapiens GN=ARPC2 PE=1 SV=1	12	0.772681	0.420727	0.469894	2.26986	0.570164	1.69044	1.70608
240	15.89	17.51	35.33	23.35	sp|P40925|MDHC_HUMAN	Malate dehydrogenase, cytoplasmic OS=Homo sapiens GN=MDH1 PE=1 SV=4	12	0.283139	0.197697	0.233346	0.544503	0.260615	0.57544	0.642688
241	15.4	17.09	35.53	22.59	sp|P61160|ARP2_HUMAN	Actin-related protein 2 OS=Homo sapiens GN=ACTR2 PE=1 SV=1	12	1.00925	0.448745	0.679204	2.24905	0.711214	1.97697	1.7378
242	14.21	15.35	71.11	43.11	sp|A2RU48|SMCO3_HUMAN	Single-pass membrane and coiled-coil domain-containing protein 3 OS=Homo sapiens GN=SMCO3 PE=1 SV=1	12	0.280543	0.18197	0.496592	2.208	0.0436516	0.390841	0.912011
243	13.98	16.09	47.86	31.6	tr|X5DQS5|X5DQS5_HUMAN	Cell adhesion molecule 1 (Fragment) OS=Homo sapiens GN=CADM1 PE=1 SV=1	12	6.91831	9.0365	5.64937	3.43558	6.30957	6.25173	5.01187
244	13.38	13.67	42.21	25.76	sp|P68104|EF1A1_HUMAN	Elongation factor 1-alpha 1 OS=Homo sapiens GN=EEF1A1 PE=1 SV=1	12	0.285759	0.405509	0.197697	2.01372	1.72187	1.80302	1.38038
245	10.09	12.23	32.87	17.7	sp|Q9Y6H8|CXA3_HUMAN	Gap junction alpha-3 protein OS=Homo sapiens GN=GJA3 PE=1 SV=4	12	4.96592	1.90546	1.52757	0.413047	5.01187	7.44732	2.31206
246	9.41	13.27	38.38	29.8	sp|P32119|PRDX2_HUMAN	Peroxiredoxin-2 OS=Homo sapiens GN=PRDX2 PE=1 SV=5	12	0.946237	0.847227	2.60615	1.35519	0.564937	0.83946	0.570164
247	8.41	10.1	30.8	17.87	sp|P30301|MIP_HUMAN	Lens fiber major intrinsic protein OS=Homo sapiens GN=MIP PE=1 SV=1	12	0.0981748	0.0787046	0.170608	2.58226	2.91072	5.24807	3.43558
248	7.28	22.06	33.69	20.04	sp|P48668|K2C6C_HUMAN	Keratin, type II cytoskeletal 6C OS=Homo sapiens GN=KRT6C PE=1 SV=3	12	1.20226	0.0765597	0.077983	0.824138	0.226986	1.14815	0.534564
249	6.57	9.44	14.63	6.62	sp|Q9NTI2|AT8A2_HUMAN	Phospholipid-transporting ATPase IB OS=Homo sapiens GN=ATP8A2 PE=1 SV=2	12	1.0666	0.862979	0.691831	1.67494	0.972747	1.38038	2.18776
250	5.14	17.88	30.72	13.65	tr|E7EQR4|E7EQR4_HUMAN	Ezrin OS=Homo sapiens GN=EZR PE=1 SV=3	12	1.72187	2.51189	3.56451	0.642688	1.48594	1.57036	0.519996
251	20.31	20.38	51.78	40.83	sp|P40926|MDHM_HUMAN	Malate dehydrogenase, mitochondrial OS=Homo sapiens GN=MDH2 PE=1 SV=3	11	2.93765	5.01187	3.94457	2.0893	3.37287	2.12814	0.648634
252	19.42	19.51	35.77	19.57	sp|P36871|PGM1_HUMAN	Phosphoglucomutase-1 OS=Homo sapiens GN=PGM1 PE=1 SV=3	11	0.390841	0.619441	0.887156	1.67494	0.483059	1.2942	1.02802
253	19.07	19.23	27.07	14.99	sp|P21980|TGM2_HUMAN	Protein-glutamine gamma-glutamyltransferase 2 OS=Homo sapiens GN=TGM2 PE=1 SV=2	11	0.409261	0.465586	0.0879023	1.88799	1.2942	1.83654	1.10662
254	18.32	18.39	39.78	21.7	sp|P25705|ATPA_HUMAN	ATP synthase subunit alpha, mitochondrial OS=Homo sapiens GN=ATP5A1 PE=1 SV=1	11	2.01372	1.55597	0.505825	2.72898	4.20727	2.0893	1.95884
255	18.09	18.14	56.88	37.61	sp|P28161|GSTM2_HUMAN	Glutathione S-transferase Mu 2 OS=Homo sapiens GN=GSTM2 PE=1 SV=2	11	1.6293	0.37325	0.104713	2.99226	2.24905	5.15229	5.34564
256	17.96	20.1	51.69	37.83	sp|P02647|APOA1_HUMAN	Apolipoprotein A-I OS=Homo sapiens GN=APOA1 PE=1 SV=1	11	0.107647	0.188799	1.7378	0.487529	0.02208	0.165959	0.0570164
257	17.89	18.79	46.81	29.48	sp|Q08257|QOR_HUMAN	Quinone oxidoreductase OS=Homo sapiens GN=CRYZ PE=1 SV=1	11	0.147231	0.175388	0.21677	1.09648	0.161436	1.00925	0.928966
258	17.61	18.39	67.12	53.77	tr|Q32Q12|Q32Q12_HUMAN	Nucleoside diphosphate kinase OS=Homo sapiens GN=NME1-NME2 PE=1 SV=1	11	0.0990832	0.349945	0.519996	0.267917	0.0469894	0.185353	0.296483
259	16.87	18.96	47.32	42.93	sp|P62820|RAB1A_HUMAN	Ras-related protein Rab-1A OS=Homo sapiens GN=RAB1A PE=1 SV=3	11	2.44343	0.787046	0.465586	1.92309	1.72187	1.94089	2.22844
260	16.72	16.78	35.54	25.14	sp|P06576|ATPB_HUMAN	ATP synthase subunit beta, mitochondrial OS=Homo sapiens GN=ATP5B PE=1 SV=3	11	3.10456	2.44343	1.11686	3.28095	4.48745	2.55859	1.39316
261	16.58	16.9	27.16	17.28	sp|Q92696|PGTA_HUMAN	Geranylgeranyl transferase type-2 subunit alpha OS=Homo sapiens GN=RABGGTA PE=1 SV=2	11	0.157036	0.231206	0.158489	0.801678	0.0963829	0.559758	1.36773
262	16.54	18.95	30.16	20.24	sp|P49189|AL9A1_HUMAN	4-trimethylaminobutyraldehyde dehydrogenase OS=Homo sapiens GN=ALDH9A1 PE=1 SV=3	11	0.263027	0.275423	0.195884	0.794328	0.10666	0.765597	1.13763
263	15.7	19	37.21	20.99	sp|Q15124|PGM5_HUMAN	Phosphoglucomutase-like protein 5 OS=Homo sapiens GN=PGM5 PE=1 SV=2	11	0.188799	0.178649	0.11695	0.772681	0.119124	0.648634	1.18032
264	15.53	15.67	50.81	28.86	sp|P51572|BAP31_HUMAN	B-cell receptor-associated protein 31 OS=Homo sapiens GN=BCAP31 PE=1 SV=3	11	5.34564	4.69894	5.86138	1.6293	2.93765	1.75388	0.554626
265	15.48	16.21	51	40.96	sp|Q9P0L0|VAPA_HUMAN	Vesicle-associated membrane protein-associated protein A OS=Homo sapiens GN=VAPA PE=1 SV=3	11	10.666	8.31764	5.15229	4.01791	6.91831	4.09261	3.01995
266	15.31	15.67	18.09	15.24	sp|P11166|GTR1_HUMAN	Solute carrier family 2, facilitated glucose transporter member 1 OS=Homo sapiens GN=SLC2A1 PE=1 SV=2	11	0.280543	0.083946	0.258226	9.90832	0.831764	5.19996	0.816582
267	15.28	15.39	49.64	36.59	sp|Q6BCY4|NB5R2_HUMAN	NADH-cytochrome b5 reductase 2 OS=Homo sapiens GN=CYB5R2 PE=1 SV=1	11	0.183654	0.0679204	0.0870964	0.405509	0.2208	0.625173	0.539511
268	15.19	19.64	35.52	20.72	sp|P08779|K1C16_HUMAN	Keratin, type I cytoskeletal 16 OS=Homo sapiens GN=KRT16 PE=1 SV=4	11	2.26986	0.608135	0.672977	1.64437	0.331131	2.24905	0.972747
269	14.92	14.98	27.49	17.92	sp|P43490|NAMPT_HUMAN	Nicotinamide phosphoribosyltransferase OS=Homo sapiens GN=NAMPT PE=1 SV=1	11	5.86138	7.31139	4.87528	6.0256	4.57088	8.87156	8.62979
270	14.51	15.22	22.58	10.67	sp|O76024|WFS1_HUMAN	Wolframin OS=Homo sapiens GN=WFS1 PE=1 SV=2	11	7.04693	5.39511	0.608135	5.54626	13.3045	10.7647	9.37562
271	14.24	18.45	47.06	26.93	sp|P12429|ANXA3_HUMAN	Annexin A3 OS=Homo sapiens GN=ANXA3 PE=1 SV=3	11	0.625173	0.328095	0.265461	2.70396	0.862979	1.40605	0.972747
272	13.08	13.84	64.77	60.1	sp|P61586|RHOA_HUMAN	Transforming protein RhoA OS=Homo sapiens GN=RHOA PE=1 SV=1	11	0.731139	0.383707	0.136773	0.648634	0.398107	0.648634	1.13763
273	12.7	13.29	88.51	55.17	sp|P07108|ACBP_HUMAN	Acyl-CoA-binding protein OS=Homo sapiens GN=DBI PE=1 SV=2	11	0.452898	1.64437	2.1677	0.383707	0.2208	0.580764	0.328095
274	12.34	14.55	32.59	21.84	sp|P15121|ALDR_HUMAN	Aldose reductase OS=Homo sapiens GN=AKR1B1 PE=1 SV=3	11	0.124738	0.226986	0.334195	0.630957	0.192309	0.436516	0.972747
275	11.64	16.73	25.54	6.797	sp|P55060|XPO2_HUMAN	Exportin-2 OS=Homo sapiens GN=CSE1L PE=1 SV=3	11	0.346737	0.394457	0.296483	2.01372	0.366438	0.619441	1.23595
276	10.21	10.26	51.42	34.91	sp|P61019|RAB2A_HUMAN	Ras-related protein Rab-2A OS=Homo sapiens GN=RAB2A PE=1 SV=1	11	5.10505	3.25087	2.39883	4.40555	1.11686	4.48745	3.53183
277	10.18	14.18	22.99	15.18	sp|P13489|RINI_HUMAN	Ribonuclease inhibitor OS=Homo sapiens GN=RNH1 PE=1 SV=2	11	0.121339	0.128233	0.0672977	0.928966	0.322107	1.25893	0.963829
278	2.01	13.59	41	30	tr|J3QS69|J3QS69_HUMAN	Eukaryotic initiation factor 4A-I (Fragment) OS=Homo sapiens GN=EIF4A1 PE=1 SV=1	11	0.334195	0.334195	0.356451	0.483059	0.401791	0.401791	0.698232
279	2	10.71	37.36	29.67	tr|D6RHY3|D6RHY3_HUMAN	Ankyrin-3 (Fragment) OS=Homo sapiens GN=ANK3 PE=1 SV=1	11	1.01859	1.22462	0.990832	0.954993	1.61436	0.954993	1.27057
280	15.96	18.14	27.13	15.66	sp|P13667|PDIA4_HUMAN	Protein disulfide-isomerase A4 OS=Homo sapiens GN=PDIA4 PE=1 SV=2	11	2.93765	1.20226	0.255859	1.47231	5.29663	1.69044	1.07647
281	20.93	21.33	24.29	14.52	tr|C9JIF9|C9JIF9_HUMAN	Acylamino-acid-releasing enzyme OS=Homo sapiens GN=APEH PE=1 SV=1	10	0.103753	0.133045	0.325087	0.559758	0.083946	0.141906	0.636796
282	20.09	20.11	63.08	45.38	sp|P00918|CAH2_HUMAN	Carbonic anhydrase 2 OS=Homo sapiens GN=CA2 PE=1 SV=2	10	0.580764	0.751623	0.158489	4.2462	0.461318	1.57036	4.61318
283	19.15	19.03	37.35	29.12	sp|P62873|GBB1_HUMAN	Guanine nucleotide-binding protein G(I)/G(S)/G(T) subunit beta-1 OS=Homo sapiens GN=GNB1 PE=1 SV=3	10	1.25893	0.954993	0.505825	1.35519	2.208	1.65959	1.24738
284	18.66	18.7	41.54	23.15	sp|P37837|TALDO_HUMAN	Transaldolase OS=Homo sapiens GN=TALDO1 PE=1 SV=2	10	0.135519	0.138038	0.313329	0.180302	0.0685488	0.301995	0.474242
285	17.65	17.87	43.91	22.84	sp|P63092|GNAS2_HUMAN	Guanine nucleotide-binding protein G(s) subunit alpha isoforms short OS=Homo sapiens GN=GNAS PE=1 SV=1	10	1.39316	0.625173	0.235505	0.704693	1.44544	1.36773	1.1695
286	17.58	17.67	23.18	15.89	tr|K7ELL7|K7ELL7_HUMAN	Glucosidase 2 subunit beta OS=Homo sapiens GN=PRKCSH PE=1 SV=1	10	18.8799	21.8776	16.4437	6.19441	18.8799	6.98232	5.10505
287	16.9	18.8	34.32	17.16	sp|Q96CV9|OPTN_HUMAN	Optineurin OS=Homo sapiens GN=OPTN PE=1 SV=2	10	2.83139	3.76704	2.37684	3.90841	4.61318	5.01187	2.77971
288	16.28	17.7	20.81	8.641	sp|Q9NQC3|RTN4_HUMAN	Reticulon-4 OS=Homo sapiens GN=RTN4 PE=1 SV=2	10	0.981748	0.731139	0.809096	0.679204	1.10662	0.42462	0.549541
289	15.78	15.79	70.07	70.07	sp|P68871|HBB_HUMAN	Hemoglobin subunit beta OS=Homo sapiens GN=HBB PE=1 SV=2	10	1.51356	0.210863	1.09648	1.92309	0.155597	0.328095	7.7983
290	15.59	15.9	33.97	25.75	sp|Q9NZU5|LMCD1_HUMAN	LIM and cysteine-rich domains protein 1 OS=Homo sapiens GN=LMCD1 PE=1 SV=1	10	3.16228	1.78649	0.549541	6.42688	7.44732	9.46237	5.64937
291	14.94	15.07	18.89	4.514	tr|A0A0D9SFK2|A0A0D9SFK2_HUMAN	Unconventional myosin-XVIIIa OS=Homo sapiens GN=MYO18A PE=1 SV=1	10	0.199526	0.21677	0.159956	1.09648	1.65959	1.13763	0.787046
292	14.58	14.93	36.1	24.36	sp|P21695|GPDA_HUMAN	Glycerol-3-phosphate dehydrogenase [NAD(+)], cytoplasmic OS=Homo sapiens GN=GPD1 PE=1 SV=4	10	1.38038	1.34276	0.887156	2.75423	2.75423	2.88403	2.14783
293	14.35	14.58	53.14	38.65	sp|P51149|RAB7A_HUMAN	Ras-related protein Rab-7a OS=Homo sapiens GN=RAB7A PE=1 SV=1	10	1.40605	0.724436	0.369828	5.24807	0.731139	2.26986	2.88403
294	14.2	14.53	48.24	31.76	sp|P25788|PSA3_HUMAN	Proteasome subunit alpha type-3 OS=Homo sapiens GN=PSMA3 PE=1 SV=2	10	0.654636	1.69044	1.70608	1.44544	0.416869	0.809096	0.711214
295	13.95	16	59.89	54.95	sp|P36405|ARL3_HUMAN	ADP-ribosylation factor-like protein 3 OS=Homo sapiens GN=ARL3 PE=1 SV=2	10	1.72187	4.28549	6.54636	0.390841	2.77971	3.69828	3.43558
296	13.72	14.78	60.19	51.85	sp|O75347|TBCA_HUMAN	Tubulin-specific chaperone A OS=Homo sapiens GN=TBCA PE=1 SV=3	10	0.534564	2.33346	1.88799	0.564937	0.334195	0.383707	0.30479
297	13.25	15.34	27.37	21.12	tr|A0A0G2JNK4|A0A0G2JNK4_HUMAN	Uncharacterized protein OS=Homo sapiens PE=4 SV=1	10	0.296483	0.258226	2.03236	0.870964	0.107647	0.383707	0.981748
298	12.73	12.79	55.56	46.83	sp|Q8N257|H2B3B_HUMAN	Histone H2B type 3-B OS=Homo sapiens GN=HIST3H2BB PE=1 SV=3	10	7.24436	3.53183	3.90841	4.9204	9.37562	6.66807	1.34276
299	12.45	12.67	25.97	18.93	sp|P07339|CATD_HUMAN	Cathepsin D OS=Homo sapiens GN=CTSD PE=1 SV=1	10	2.99226	3.34195	3.63078	0.990832	2.39883	0.515229	1.39316
300	12.05	13.93	32.15	22.03	sp|P31153|METK2_HUMAN	S-adenosylmethionine synthase isoform type-2 OS=Homo sapiens GN=MAT2A PE=1 SV=1	10	0.15417	0.201372	0.554626	0.409261	0.0625173	0.349945	0.487529
301	9.37	13.41	19.9	12.84	sp|O60506|HNRPQ_HUMAN	Heterogeneous nuclear ribonucleoprotein Q OS=Homo sapiens GN=SYNCRIP PE=1 SV=2	10	4.48745	3.63078	4.28549	3.40408	9.54993	6.19441	4.01791
302	8.94	15.66	69.28	53.01	sp|Q9Y281|COF2_HUMAN	Cofilin-2 OS=Homo sapiens GN=CFL2 PE=1 SV=1	10	2.77971	1.00925	0.549541	3.59749	3.19154	4.87528	3.66438
303	8.77	9.21	64.36	42.57	sp|P26447|S10A4_HUMAN	Protein S100-A4 OS=Homo sapiens GN=S100A4 PE=1 SV=1	10	8.01678	7.31139	7.51623	21.4783	5.64937	4.2462	2.44343
304	8.52	12.59	51.29	25.46	sp|Q13162|PRDX4_HUMAN	Peroxiredoxin-4 OS=Homo sapiens GN=PRDX4 PE=1 SV=1	10	0.855067	0.83946	0.711214	0.570164	1.49968	0.630957	0.510505
305	7.36	10.75	27.64	11.74	sp|P08133|ANXA6_HUMAN	Annexin A6 OS=Homo sapiens GN=ANXA6 PE=1 SV=3	10	1.28233	1.20226	1.19124	1.43219	1.07647	1.25893	1.27057
306	16.22	16.6	42.74	32.26	sp|O14818|PSA7_HUMAN	Proteasome subunit alpha type-7 OS=Homo sapiens GN=PSMA7 PE=1 SV=1	9	0.847227	2.85759	2.58226	2.208	0.380189	0.717794	1.05682
307	14.67	14.73	29.15	17.87	tr|H0Y4R1|H0Y4R1_HUMAN	Inosine-5'-monophosphate dehydrogenase 2 (Fragment) OS=Homo sapiens GN=IMPDH2 PE=1 SV=1	9	0.242103	0.141906	0.0912011	0.145881	0.135519	0.380189	0.519996
308	14.64	15.04	25.71	11.23	sp|P41250|SYG_HUMAN	Glycine--tRNA ligase OS=Homo sapiens GN=GARS PE=1 SV=3	9	0.331131	0.253513	0.444631	0.870964	0.30479	0.77983	1.1272
309	14.63	15.16	32.22	21.67	sp|P28482|MK01_HUMAN	Mitogen-activated protein kinase 1 OS=Homo sapiens GN=MAPK1 PE=1 SV=3	9	0.487529	0.461318	0.428549	0.870964	0.630957	1.09648	1.09648
310	14.58	14.62	16.34	8.663	sp|P55011|S12A2_HUMAN	Solute carrier family 12 member 2 OS=Homo sapiens GN=SLC12A2 PE=1 SV=1	9	3.04789	2.60615	0.794328	1.44544	2.33346	1.6293	2.33346
311	14.53	14.59	57.93	41.38	sp|P30084|ECHM_HUMAN	Enoyl-CoA hydratase, mitochondrial OS=Homo sapiens GN=ECHS1 PE=1 SV=4	9	3.94457	9.2045	0.37325	10.1859	14.5881	8.55067	8.31764
312	14.45	14.5	43.35	29.28	sp|P25786|PSA1_HUMAN	Proteasome subunit alpha type-1 OS=Homo sapiens GN=PSMA1 PE=1 SV=1	9	0.794328	2.12814	2.14783	1.80302	0.255859	0.737904	0.580764
313	14.28	14.34	22.21	14.9	tr|H0Y4R2|H0Y4R2_HUMAN	NADPH--cytochrome P450 reductase (Fragment) OS=Homo sapiens GN=POR PE=1 SV=1	9	3.37287	4.20727	1.01859	2.85759	7.7983	3.80189	3.10456
314	14.27	14.29	35.25	21.34	sp|P27797|CALR_HUMAN	Calreticulin OS=Homo sapiens GN=CALR PE=1 SV=1	9	3.13329	2.10863	1.44544	2.208	5.05825	1.69044	1.80302
315	14.2	14.71	25.51	14.19	sp|P27824|CALX_HUMAN	Calnexin OS=Homo sapiens GN=CANX PE=1 SV=2	9	4.40555	3.43558	1.13763	1.1272	4.65586	2.01372	1.94089
316	14.17	16.35	36.97	18.48	sp|O00231|PSD11_HUMAN	26S proteasome non-ATPase regulatory subunit 11 OS=Homo sapiens GN=PSMD11 PE=1 SV=3	9	1.13763	1.21339	0.190546	2.10863	1.94089	1.88799	1.48594
317	14.16	14.2	60.91	36.04	sp|P61758|PFD3_HUMAN	Prefoldin subunit 3 OS=Homo sapiens GN=VBP1 PE=1 SV=3	9	1.69044	4.28549	4.9204	0.831764	2.48886	1.13763	1.34276
318	13.88	16.02	40.13	24.73	sp|Q02818|NUCB1_HUMAN	Nucleobindin-1 OS=Homo sapiens GN=NUCB1 PE=1 SV=4	9	7.17794	9.81748	6.54636	2.26986	4.52898	2.72898	3.43558
319	13.7	13.72	28.9	20.96	sp|P22626|ROA2_HUMAN	Heterogeneous nuclear ribonucleoproteins A2/B1 OS=Homo sapiens GN=HNRNPA2B1 PE=1 SV=2	9	2.72898	0.990832	1.14815	1.03753	3.46737	0.972747	0.824138
320	13.49	13.52	44.2	32.14	sp|Q9H444|CHM4B_HUMAN	Charged multivesicular body protein 4b OS=Homo sapiens GN=CHMP4B PE=1 SV=1	9	9.2045	19.2309	18.0302	4.61318	8.09096	2.05116	1.97697
321	12.7	12.79	13.76	6.293	sp|Q92729|PTPRU_HUMAN	Receptor-type tyrosine-protein phosphatase U OS=Homo sapiens GN=PTPRU PE=1 SV=2	9	3.04789	2.26986	1.5417	1.87068	2.53513	1.61436	1.78649
322	12.66	14.29	12.88	3.323	sp|P46821|MAP1B_HUMAN	Microtubule-associated protein 1B OS=Homo sapiens GN=MAP1B PE=1 SV=2	9	1.88799	2.44343	0.824138	1.1272	3.69828	3.34195	4.01791
323	12.63	12.69	41.18	31.86	sp|P52565|GDIR1_HUMAN	Rho GDP-dissociation inhibitor 1 OS=Homo sapiens GN=ARHGDIA PE=1 SV=3	9	0.432514	0.539511	0.937562	0.77983	0.288403	0.648634	0.937562
324	12.51	13.03	22.09	11.3	sp|O95817|BAG3_HUMAN	BAG family molecular chaperone regulator 3 OS=Homo sapiens GN=BAG3 PE=1 SV=3	9	9.63829	12.2462	12.1339	1.97697	11.8032	9.12011	3.76704
325	12.45	13.41	25.85	14.88	sp|P43034|LIS1_HUMAN	Platelet-activating factor acetylhydrolase IB subunit alpha OS=Homo sapiens GN=PAFAH1B1 PE=1 SV=2	9	0.356451	0.47863	0.369828	0.855067	0.210863	0.57544	0.613762
326	12.43	13.91	19.78	14.29	tr|A0A0C4DFP6|A0A0C4DFP6_HUMAN	Cartilage acidic protein 1 OS=Homo sapiens GN=CRTAC1 PE=1 SV=1	9	5.29663	5.19996	0.398107	2.14783	10.2802	8.01678	2.75423
327	12.2	12.34	44.86	30.53	tr|B5MCX3|B5MCX3_HUMAN	Septin-2 OS=Homo sapiens GN=SEPT2 PE=1 SV=1	9	2.03236	2.88403	4.28549	1.30617	1.38038	2.22844	1.83654
328	12.14	14.34	26.8	16.13	sp|O76054|S14L2_HUMAN	SEC14-like protein 2 OS=Homo sapiens GN=SEC14L2 PE=1 SV=1	9	0.0758578	0.0870964	0.083946	0.461318	0.0816582	0.758578	1.20226
329	12.07	14.53	24.86	7.553	sp|Q9UDT6|CLIP2_HUMAN	CAP-Gly domain-containing linker protein 2 OS=Homo sapiens GN=CLIP2 PE=1 SV=1	9	1.59956	1.38038	1.1272	0.619441	1.02802	1.11686	1.33045
330	10.56	12.95	44.95	34.34	sp|O15498|YKT6_HUMAN	Synaptobrevin homolog YKT6 OS=Homo sapiens GN=YKT6 PE=1 SV=1	9	1.47231	0.772681	0.293765	3.28095	0.654636	1.83654	2.07014
331	9.28	11.34	36.7	25.8	sp|P61163|ACTZ_HUMAN	Alpha-centractin OS=Homo sapiens GN=ACTR1A PE=1 SV=1	9	0.487529	0.448745	0.340408	1	0.862979	0.903649	0.591562
332	9.06	10.46	30.83	16.18	sp|P28838|AMPL_HUMAN	Cytosol aminopeptidase OS=Homo sapiens GN=LAP3 PE=1 SV=3	9	4.9204	10.9648	11.1686	3.98107	2.18776	1.28233	1.70608
333	8.92	12.77	23.21	5.895	sp|Q86UP2|KTN1_HUMAN	Kinectin OS=Homo sapiens GN=KTN1 PE=1 SV=1	9	0.981748	1.25893	0.870964	0.787046	1.08643	0.704693	0.990832
334	8.42	13.4	13.14	3.537	sp|O60292|SI1L3_HUMAN	Signal-induced proliferation-associated 1-like protein 3 OS=Homo sapiens GN=SIPA1L3 PE=1 SV=3	9	1.08643	1.08643	0.879023	0.394457	2.01372	1.28233	1.25893
335	7.25	10.22	13.53	4.92	sp|Q14152|EIF3A_HUMAN	Eukaryotic translation initiation factor 3 subunit A OS=Homo sapiens GN=EIF3A PE=1 SV=1	9	1.59956	1.77011	0.758578	2.37684	2.18776	1.83654	2.60615
336	4.32	16.9	70.67	39.42	sp|Q9NRW1|RAB6B_HUMAN	Ras-related protein Rab-6B OS=Homo sapiens GN=RAB6B PE=1 SV=1	9	1.31826	1.03753	0.436516	4.05509	0.387258	1.88799	1.5417
337	3.86	18.14	24.58	14.58	sp|P13647|K2C5_HUMAN	Keratin, type II cytoskeletal 5 OS=Homo sapiens GN=KRT5 PE=1 SV=3	9	0.685488	0.277971	0.654636	0.660693	0.625173	0.731139	0.648634
338	2.61	12.49	49.8	24.49	sp|P27348|1433T_HUMAN	14-3-3 protein theta OS=Homo sapiens GN=YWHAQ PE=1 SV=1	9	1.34276	1.92309	1.0666	1.67494	1.47231	1.05682	0.597035
339	2.06	5.88	16.14	2.372	sp|P12882|MYH1_HUMAN	Myosin-1 OS=Homo sapiens GN=MYH1 PE=1 SV=3	9	0.711214	0.534564	0.83946	0.597035	0.457088	0.510505	0.772681
340	2	15.98	31.24	20.89	tr|H7C4C5|H7C4C5_HUMAN	Microtubule-associated protein (Fragment) OS=Homo sapiens GN=MAP4 PE=1 SV=1	9	0.787046	1.02802	0.895365	0.928966	0.963829	0.794328	0.809096
341	2	9.94	40.36	34.94	tr|U3KQK0|U3KQK0_HUMAN	Histone H2B OS=Homo sapiens GN=HIST1H2BN PE=1 SV=1	9	0.679204	0.242103	0.369828	0.685488	1.49968	0.758578	0.141906
342	16.65	16.62	30.94	25.11	sp|O15173|PGRC2_HUMAN	Membrane-associated progesterone receptor component 2 OS=Homo sapiens GN=PGRMC2 PE=1 SV=1	8	5.70164	5.34564	4.57088	2.03236	2.65461	1.34276	1.97697
343	16.4	16.42	34.86	30.81	sp|Q9UNZ2|NSF1C_HUMAN	NSFL1 cofactor p47 OS=Homo sapiens GN=NSFL1C PE=1 SV=2	8	6.13762	10.7647	9.72747	4.05509	9.63829	7.58578	3.53183
344	16.36	16.37	28.84	14.79	sp|O43242|PSMD3_HUMAN	26S proteasome non-ATPase regulatory subunit 3 OS=Homo sapiens GN=PSMD3 PE=1 SV=2	8	0.49204	0.301995	0.554626	0.937562	0.465586	0.717794	0.679204
345	14.77	17	29.75	17.42	sp|P21281|VATB2_HUMAN	V-type proton ATPase subunit B, brain isoform OS=Homo sapiens GN=ATP6V1B2 PE=1 SV=3	8	0.42462	0.195884	0.369828	1.02802	0.316228	0.648634	1.48594
346	14.7	14.71	43.42	17.65	sp|P30533|AMRP_HUMAN	Alpha-2-macroglobulin receptor-associated protein OS=Homo sapiens GN=LRPAP1 PE=1 SV=1	8	2.60615	4.2462	3.16228	1.21339	2.44343	0.787046	0.642688
347	14.35	14.56	42.86	23.59	tr|B1AK88|B1AK88_HUMAN	Capping protein (Actin filament) muscle Z-line, beta, isoform CRA_d OS=Homo sapiens GN=CAPZB PE=1 SV=1	8	0.619441	0.401791	0.231206	0.83946	0.77983	0.990832	0.469894
348	14.32	14.51	29.95	19.8	sp|Q5T9C9|PI5L1_HUMAN	Phosphatidylinositol 4-phosphate 5-kinase-like protein 1 OS=Homo sapiens GN=PIP5KL1 PE=2 SV=2	8	1.31826	0.510505	0.319154	3.46737	1.5417	2.60615	2.96483
349	14.02	14.23	25	11.14	sp|P02545|LMNA_HUMAN	Prelamin-A/C OS=Homo sapiens GN=LMNA PE=1 SV=1	8	1.72187	1.38038	1.31826	0.586138	0.855067	0.496592	0.912011
350	13.96	14.01	15.95	7.135	tr|A0A087WW66|A0A087WW66_HUMAN	26S proteasome non-ATPase regulatory subunit 1 OS=Homo sapiens GN=PSMD1 PE=1 SV=1	8	0.824138	0.672977	0.47863	1.7378	1.39316	1.24738	0.928966
351	13.91	14.19	32.57	16.63	sp|Q07960|RHG01_HUMAN	Rho GTPase-activating protein 1 OS=Homo sapiens GN=ARHGAP1 PE=1 SV=1	8	0.895365	1.10662	0.903649	1.97697	0.855067	1.5417	1.52757
352	13.67	13.85	51.56	34.38	sp|P63000|RAC1_HUMAN	Ras-related C3 botulinum toxin substrate 1 OS=Homo sapiens GN=RAC1 PE=1 SV=1	8	0.554626	0.260615	0.212814	0.990832	0.197697	0.92045	1.57036
353	13.46	13.54	36.61	28.14	sp|P54920|SNAA_HUMAN	Alpha-soluble NSF attachment protein OS=Homo sapiens GN=NAPA PE=1 SV=3	8	1.31826	1.15878	0.597035	2.58226	0.704693	1.18032	2.55859
354	13.29	13.35	28.84	23.51	sp|Q9Y2S2|CRYL1_HUMAN	Lambda-crystallin homolog OS=Homo sapiens GN=CRYL1 PE=1 SV=3	8	0.229087	0.0625173	0.325087	0.816582	0.133045	0.510505	1.0666
355	13.24	15.09	32.26	14.52	sp|P00367|DHE3_HUMAN	Glutamate dehydrogenase 1, mitochondrial OS=Homo sapiens GN=GLUD1 PE=1 SV=2	8	1.23595	0.92045	2.01372	1.25893	1.52757	0.679204	0.972747
356	13.03	13.09	63.57	59.29	sp|P07737|PROF1_HUMAN	Profilin-1 OS=Homo sapiens GN=PFN1 PE=1 SV=2	8	2.58226	2.83139	2.85759	3.90841	7.51623	6.60693	4.87528
357	12.63	12.67	25.54	24.46	sp|P16989|YBOX3_HUMAN	Y-box-binding protein 3 OS=Homo sapiens GN=YBX3 PE=1 SV=4	8	3.87258	4.96592	2.37684	0.343558	4.48745	2.03236	1.24738
358	12.2	14.77	46.89	34.44	sp|P28066|PSA5_HUMAN	Proteasome subunit alpha type-5 OS=Homo sapiens GN=PSMA5 PE=1 SV=3	8	1.14815	4.28549	4.01791	3.31131	1.19124	1.02802	1.15878
359	12.11	15.91	20.38	9.359	sp|P08237|PFKAM_HUMAN	ATP-dependent 6-phosphofructokinase, muscle type OS=Homo sapiens GN=PFKM PE=1 SV=2	8	0.772681	0.672977	0.711214	1.24738	0.608135	1.05682	1.39316
360	12.03	14.2	34.08	21.69	sp|P04899|GNAI2_HUMAN	Guanine nucleotide-binding protein G(i) subunit alpha-2 OS=Homo sapiens GN=GNAI2 PE=1 SV=3	8	0.420727	0.420727	0.337287	0.954993	1.21339	1.22462	0.895365
361	11.94	12.1	61.97	45.77	sp|Q14019|COTL1_HUMAN	Coactosin-like protein OS=Homo sapiens GN=COTL1 PE=1 SV=3	8	0.534564	0.619441	0.316228	1.7378	0.679204	2.39883	2.18776
362	11.9	14.2	25.2	11.62	sp|P09960|LKHA4_HUMAN	Leukotriene A-4 hydrolase OS=Homo sapiens GN=LTA4H PE=1 SV=2	8	0.147231	0.283139	0.195884	0.608135	0.0685488	0.413047	0.928966
363	11.47	15.01	32.48	18.8	sp|Q8N335|GPD1L_HUMAN	Glycerol-3-phosphate dehydrogenase 1-like protein OS=Homo sapiens GN=GPD1L PE=1 SV=1	8	0.30479	0.151356	0.0457088	1	0.564937	0.824138	1.08643
364	11.07	13.32	21.38	9.337	tr|I3L0N3|I3L0N3_HUMAN	Vesicle-fusing ATPase OS=Homo sapiens GN=NSF PE=1 SV=1	8	0.981748	0.685488	0.343558	1.03753	0.847227	0.946237	1.78649
365	11.04	13.39	25.35	14.46	sp|P50995|ANX11_HUMAN	Annexin A11 OS=Homo sapiens GN=ANXA11 PE=1 SV=1	8	3.13329	1.45881	0.751623	0.758578	0.416869	0.310456	0.501187
366	10.94	13.08	53.26	25.29	sp|P30040|ERP29_HUMAN	Endoplasmic reticulum resident protein 29 OS=Homo sapiens GN=ERP29 PE=1 SV=4	8	4.65586	3.01995	1.88799	0.954993	4.74242	0.801678	1.11686
367	10.72	11.37	22.8	13.41	sp|P00390|GSHR_HUMAN	Glutathione reductase, mitochondrial OS=Homo sapiens GN=GSR PE=1 SV=2	8	0.11695	0.597035	0.619441	0.313329	0.0570164	0.205116	0.428549
368	10.5	10.61	33.98	15.32	sp|P28289|TMOD1_HUMAN	Tropomodulin-1 OS=Homo sapiens GN=TMOD1 PE=1 SV=1	8	3.46737	2.91072	0.559758	1.58489	4.57088	2.75423	3.13329
369	9.88	10.05	25.87	17.98	sp|P02649|APOE_HUMAN	Apolipoprotein E OS=Homo sapiens GN=APOE PE=1 SV=1	8	0.946237	0.887156	1.1695	0.731139	1.35519	0.0895365	1.23595
370	9.46	9.96	21.77	7.652	sp|Q16891|MIC60_HUMAN	MICOS complex subunit MIC60 OS=Homo sapiens GN=IMMT PE=1 SV=1	8	3.46737	2.55859	2.63027	2.29087	6.42688	2.65461	2.35505
371	9.43	11.02	21.77	10.03	sp|Q12797|ASPH_HUMAN	Aspartyl/asparaginyl beta-hydroxylase OS=Homo sapiens GN=ASPH PE=1 SV=3	8	2.0893	1.34276	0.474242	0.648634	3.83707	0.831764	1.40605
372	9.37	13.65	46.15	17.09	sp|P17612|KAPCA_HUMAN	cAMP-dependent protein kinase catalytic subunit alpha OS=Homo sapiens GN=PRKACA PE=1 SV=2	8	0.870964	1.02802	0.608135	2.48886	1.44544	2.07014	2.24905
373	9.16	13.68	31.28	15.38	sp|Q6NZI2|PTRF_HUMAN	Polymerase I and transcript release factor OS=Homo sapiens GN=PTRF PE=1 SV=1	8	2.91072	0.990832	0.369828	0.625173	0.169044	3.10456	1.77011
374	8.69	12.16	31.38	18.06	sp|P61201|CSN2_HUMAN	COP9 signalosome complex subunit 2 OS=Homo sapiens GN=COPS2 PE=1 SV=1	8	0.660693	0.246604	0.0461318	3.01995	0.413047	3.04789	2.77971
375	8	10	42.59	28.7	sp|P51148|RAB5C_HUMAN	Ras-related protein Rab-5C OS=Homo sapiens GN=RAB5C PE=1 SV=2	8	1.77011	1.35519	1.13763	2.39883	1.31826	1.5417	1.43219
376	8	8.01	46	41	sp|Q15836|VAMP3_HUMAN	Vesicle-associated membrane protein 3 OS=Homo sapiens GN=VAMP3 PE=1 SV=3	8	0.765597	1.04713	0.946237	0.570164	0.672977	0.625173	0.816582
377	7.64	11.99	31.23	13.35	sp|P31689|DNJA1_HUMAN	DnaJ homolog subfamily A member 1 OS=Homo sapiens GN=DNAJA1 PE=1 SV=2	8	2.03236	1.08643	2.39883	2.58226	0.390841	1.87068	1.23595
378	6	11.68	33.33	24.46	tr|A0A0G2JN06|A0A0G2JN06_HUMAN	Uncharacterized protein OS=Homo sapiens PE=4 SV=1	8	0.316228	0.135519	1.24738	0.717794	0.251189	0.239883	0.288403
379	5.96	11.62	27.23	13.99	sp|Q9BWS9|CHID1_HUMAN	Chitinase domain-containing protein 1 OS=Homo sapiens GN=CHID1 PE=1 SV=1	8	0.879023	1.22462	0.801678	1.28233	1.59956	2.29087	1.23595
380	4.02	6.26	19.14	5.042	sp|O14980|XPO1_HUMAN	Exportin-1 OS=Homo sapiens GN=XPO1 PE=1 SV=1	8	1.23595	1.23595	0.765597	1.34276	0.591562	1.22462	1.36773
381	2.63	13.06	32.77	20.9	sp|P08754|GNAI3_HUMAN	Guanine nucleotide-binding protein G(k) subunit alpha OS=Homo sapiens GN=GNAI3 PE=1 SV=3	8	0.619441	0.496592	0.42462	0.879023	1.30617	1.23595	1.07647
382	2.24	9.86	28.15	10.58	sp|P17066|HSP76_HUMAN	Heat shock 70 kDa protein 6 OS=Homo sapiens GN=HSPA6 PE=1 SV=2	8	1.44544	0.224905	0.0870964	3.94457	10.4713	4.83059	1.45881
383	2.02	13.9	37.97	25.74	tr|E7EWW9|E7EWW9_HUMAN	Glutathione S-transferase Mu 1 OS=Homo sapiens GN=GSTM1 PE=1 SV=1	8	0.343558	0.369828	0.405509	0.359749	0.597035	0.313329	1.92309
384	2.01	14.35	51.24	37.81	sp|Q9H0U4|RAB1B_HUMAN	Ras-related protein Rab-1B OS=Homo sapiens GN=RAB1B PE=1 SV=1	8	2.83139	1.83654	1.58489	1.85353	3.31131	2.85759	1.27057
385	2.01	6.44	20.48	2.542	sp|Q9BZF9|UACA_HUMAN	Uveal autoantigen with coiled-coil domains and ankyrin repeats OS=Homo sapiens GN=UACA PE=1 SV=2	8	0.0630957	0.409261	0.120226	0.636796	0.224905	0.501187	0.359749
386	2	3.92	14.12	1.87	sp|Q14008|CKAP5_HUMAN	Cytoskeleton-associated protein 5 OS=Homo sapiens GN=CKAP5 PE=1 SV=3	8	0.666807	0.963829	0.539511	1.05682	0.895365	0.981748	1.45881
387	8.65	11.64	16.65	7.087	sp|P21399|ACOC_HUMAN	Cytoplasmic aconitate hydratase OS=Homo sapiens GN=ACO1 PE=1 SV=3	8	0.672977	0.57544	0.501187	0.954993	0.744732	0.855067	1.61436
388	14.8	14.82	15.97	8.15	sp|Q13200|PSMD2_HUMAN	26S proteasome non-ATPase regulatory subunit 2 OS=Homo sapiens GN=PSMD2 PE=1 SV=3	7	0.625173	0.201372	0.0772681	1.75388	0.990832	1.38038	1.05682
389	14.54	14.65	19.56	7.611	tr|E9PFZ2|E9PFZ2_HUMAN	Ceruloplasmin OS=Homo sapiens GN=CP PE=1 SV=1	7	1.47231	1.95884	2.24905	1.5417	1.27057	1.48594	0.711214
390	14.47	14.54	33.77	17.68	sp|P27361|MK03_HUMAN	Mitogen-activated protein kinase 3 OS=Homo sapiens GN=MAPK3 PE=1 SV=4	7	0.42462	0.363078	0.242103	1.2942	0.801678	1.38038	1.67494
391	14.45	14.81	31.03	16.77	sp|P40123|CAP2_HUMAN	Adenylyl cyclase-associated protein 2 OS=Homo sapiens GN=CAP2 PE=1 SV=1	7	3.28095	3.31131	1.90546	7.17794	3.46737	5.49541	1.95884
392	14	14.04	23.39	12.03	tr|B0QY89|B0QY89_HUMAN	Eukaryotic translation initiation factor 3 subunit L OS=Homo sapiens GN=EIF3L PE=1 SV=1	7	0.328095	0.47863	0.359749	0.870964	0.416869	0.432514	1.02802
393	13.87	13.94	51.49	27.24	sp|Q15691|MARE1_HUMAN	Microtubule-associated protein RP/EB family member 1 OS=Homo sapiens GN=MAPRE1 PE=1 SV=3	7	5.19996	7.44732	9.37562	4.40555	13.8038	7.65597	6.36796
394	13.77	13.88	23.98	9.174	sp|P40939|ECHA_HUMAN	Trifunctional enzyme subunit alpha, mitochondrial OS=Homo sapiens GN=HADHA PE=1 SV=2	7	1.6293	0.903649	0.765597	1.18032	4.7863	2.35505	2.29087
395	13.56	13.6	43.03	36.07	sp|P09417|DHPR_HUMAN	Dihydropteridine reductase OS=Homo sapiens GN=QDPR PE=1 SV=2	7	0.0855067	0.100925	0.251189	0.280543	0.0981748	0.319154	0.390841
396	13.36	13.39	24.61	18.3	sp|P63244|GBLP_HUMAN	Guanine nucleotide-binding protein subunit beta-2-like 1 OS=Homo sapiens GN=GNB2L1 PE=1 SV=3	7	0.356451	0.299226	0.401791	1.28233	0.570164	0.554626	1.15878
397	13.01	13.04	41.97	36.27	sp|P61601|NCALD_HUMAN	Neurocalcin-delta OS=Homo sapiens GN=NCALD PE=1 SV=2	7	1.51356	1.38038	1.23595	1.78649	1.28233	1.05682	0.83946
398	12.93	12.99	68.42	53.29	sp|P61088|UBE2N_HUMAN	Ubiquitin-conjugating enzyme E2 N OS=Homo sapiens GN=UBE2N PE=1 SV=1	7	0.963829	1.19124	1.20226	0.751623	0.744732	1.11686	0.744732
399	12.89	12.97	32.91	26.58	sp|Q5VWZ2|LYPL1_HUMAN	Lysophospholipase-like protein 1 OS=Homo sapiens GN=LYPLAL1 PE=1 SV=3	7	0.138038	0.155597	0.201372	0.787046	0.349945	0.42462	0.666807
400	12.88	13.25	34.28	23.58	sp|P60891|PRPS1_HUMAN	Ribose-phosphate pyrophosphokinase 1 OS=Homo sapiens GN=PRPS1 PE=1 SV=2	7	0.102802	0.101859	0.0691831	0.685488	0.144544	0.519996	1.13763
401	12.76	13	50.83	31.49	sp|P61204|ARF3_HUMAN	ADP-ribosylation factor 3 OS=Homo sapiens GN=ARF3 PE=1 SV=2	7	0.554626	0.260615	0.147231	0.691831	0.353183	0.549541	0.972747
402	12.54	13.91	28.18	19.24	sp|P50502|F10A1_HUMAN	Hsc70-interacting protein OS=Homo sapiens GN=ST13 PE=1 SV=2	7	3.56451	4.05509	5.54626	2.51189	2.77971	1.92309	1.34276
403	12.49	12.55	33.33	27.89	sp|P06748|NPM_HUMAN	Nucleophosmin OS=Homo sapiens GN=NPM1 PE=1 SV=2	7	3.87258	5.15229	4.74242	1.19124	3.19154	1.08643	0.731139
404	12.21	12.45	40.18	23.87	sp|Q9Y266|NUDC_HUMAN	Nuclear migration protein nudC OS=Homo sapiens GN=NUDC PE=1 SV=1	7	0.847227	0.717794	1.30617	1.45881	0.870964	2.18776	1.30617
405	12.09	12.14	32.79	23.5	tr|Q05BK6|Q05BK6_HUMAN	Protein TFG OS=Homo sapiens GN=TFG PE=1 SV=1	7	3.87258	5.10505	5.10505	5.24807	4.09261	3.83707	5.59758
406	12.03	12.04	46.53	39.58	sp|Q9P0J0|NDUAD_HUMAN	NADH dehydrogenase [ubiquinone] 1 alpha subcomplex subunit 13 OS=Homo sapiens GN=NDUFA13 PE=1 SV=3	7	0.937562	0.564937	1.34276	1.21339	0.608135	0.487529	1.30617
407	12	12.01	72.55	59.8	sp|P61604|CH10_HUMAN	10 kDa heat shock protein, mitochondrial OS=Homo sapiens GN=HSPE1 PE=1 SV=2	7	5.80764	6.72977	4.69894	0.698232	7.31139	0.608135	0.912011
408	11.87	12.14	20.58	11.51	tr|A0A0A0MSQ0|A0A0A0MSQ0_HUMAN	Plastin-3 OS=Homo sapiens GN=PLS3 PE=1 SV=1	7	1.03753	0.981748	0.672977	2.01372	1.59956	1.67494	2.07014
409	11.68	11.78	41.44	32.7	sp|P28074|PSB5_HUMAN	Proteasome subunit beta type-5 OS=Homo sapiens GN=PSMB5 PE=1 SV=3	7	0.30479	1.01859	1.39316	1.13763	0.461318	0.794328	0.831764
410	11.37	13.46	34.75	15.6	tr|R4GNH3|R4GNH3_HUMAN	26S protease regulatory subunit 6A OS=Homo sapiens GN=PSMC3 PE=1 SV=1	7	3.63078	3.04789	0.912011	2.83139	4.65586	4.7863	3.46737
411	11.24	11.78	18.6	16.18	sp|Q12765|SCRN1_HUMAN	Secernin-1 OS=Homo sapiens GN=SCRN1 PE=1 SV=2	7	0.83946	0.772681	1.15878	1.24738	0.630957	1.40605	1.21339
412	11.21	11.94	22.29	10.63	sp|Q9UQ03|COR2B_HUMAN	Coronin-2B OS=Homo sapiens GN=CORO2B PE=1 SV=4	7	1.33045	0.83946	0.334195	2.51189	3.40408	3.13329	1.69044
413	11.1	11.38	40.98	27.46	sp|Q99426|TBCB_HUMAN	Tubulin-folding cofactor B OS=Homo sapiens GN=TBCB PE=1 SV=2	7	0.619441	0.954993	0.691831	1.77011	0.895365	2.208	2.39883
414	11.09	11.13	59.87	48.03	tr|H3BPF6|H3BPF6_HUMAN	Prefoldin subunit 5 (Fragment) OS=Homo sapiens GN=PFDN5 PE=1 SV=1	7	1.00925	4.28549	5.15229	0.534564	1.6293	1.13763	0.855067
415	10.96	11.4	25.42	19.27	sp|Q9UBS4|DJB11_HUMAN	DnaJ homolog subfamily B member 11 OS=Homo sapiens GN=DNAJB11 PE=1 SV=1	7	2.67917	3.46737	2.53513	1.33045	2.18776	0.691831	0.963829
416	10.8	11.15	25.51	10.99	sp|Q8TCT0|CERK1_HUMAN	Ceramide kinase OS=Homo sapiens GN=CERK PE=1 SV=1	7	1.1695	0.401791	0.366438	0.529663	1.72187	6.91831	2.60615
417	10.8	10.97	39.83	24.07	sp|P20618|PSB1_HUMAN	Proteasome subunit beta type-1 OS=Homo sapiens GN=PSMB1 PE=1 SV=2	7	0.501187	0.895365	1	1.05682	0.331131	0.544503	0.642688
418	10.51	10.62	45.97	37.44	sp|Q9GZP4|PITH1_HUMAN	PITH domain-containing protein 1 OS=Homo sapiens GN=PITHD1 PE=1 SV=1	7	0.353183	0.704693	1.02802	0.990832	0.246604	0.505825	0.613762
419	10.45	10.53	65.74	52.78	sp|P18859|ATP5J_HUMAN	ATP synthase-coupling factor 6, mitochondrial OS=Homo sapiens GN=ATP5J PE=1 SV=1	7	1.44544	2.75423	2.208	0.794328	1.24738	0.57544	0.862979
420	10.33	12.45	19.89	13.19	sp|Q9Y6G9|DC1L1_HUMAN	Cytoplasmic dynein 1 light intermediate chain 1 OS=Homo sapiens GN=DYNC1LI1 PE=1 SV=3	7	3.90841	2.83139	1.78649	2.46604	3.80189	5.54626	2.37684
421	10.31	11.45	28.07	13.38	sp|O00232|PSD12_HUMAN	26S proteasome non-ATPase regulatory subunit 12 OS=Homo sapiens GN=PSMD12 PE=1 SV=3	7	0.801678	0.870964	0.401791	1.22462	0.895365	0.887156	1.1695
422	10	10.39	28.71	19.24	sp|O00214|LEG8_HUMAN	Galectin-8 OS=Homo sapiens GN=LGALS8 PE=1 SV=4	7	4.48745	4.28549	3.04789	2.0893	5.10505	2.99226	2.48886
423	10	10	23.01	19.67	sp|P28072|PSB6_HUMAN	Proteasome subunit beta type-6 OS=Homo sapiens GN=PSMB6 PE=1 SV=4	7	0.809096	1.20226	1.49968	0.928966	0.185353	0.405509	0.724436
424	9.91	11.12	30.68	15.45	sp|Q15084|PDIA6_HUMAN	Protein disulfide-isomerase A6 OS=Homo sapiens GN=PDIA6 PE=1 SV=1	7	2.1677	1.7378	1.0666	0.758578	2.72898	1.00925	0.461318
425	9.56	9.75	21.04	11.45	sp|P61764|STXB1_HUMAN	Syntaxin-binding protein 1 OS=Homo sapiens GN=STXBP1 PE=1 SV=1	7	0.912011	0.559758	0.390841	1.28233	1.38038	1.34276	1.1272
426	9.33	9.45	36.19	23.74	tr|K7EMC9|K7EMC9_HUMAN	WW domain-binding protein 2 OS=Homo sapiens GN=WBP2 PE=1 SV=1	7	0.816582	0.744732	1.41906	1.88799	0.0981748	0.483059	1.41906
427	9.31	9.46	22.01	12.13	sp|O95793|STAU1_HUMAN	Double-stranded RNA-binding protein Staufen homolog 1 OS=Homo sapiens GN=STAU1 PE=1 SV=2	7	1.70608	3.25087	1.49968	1.78649	3.56451	1.43219	1.70608
428	9.24	9.29	38.03	35.21	sp|P69905|HBA_HUMAN	Hemoglobin subunit alpha OS=Homo sapiens GN=HBA1 PE=1 SV=2	7	1.19124	0.353183	3.98107	3.59749	0.285759	0.724436	11.3763
429	9.19	10.04	42.75	24.64	sp|Q9NQR4|NIT2_HUMAN	Omega-amidase NIT2 OS=Homo sapiens GN=NIT2 PE=1 SV=1	7	0.260615	0.529663	0.432514	0.928966	0.398107	0.642688	0.731139
430	9.12	9.27	18.47	6.833	sp|Q9UPQ0|LIMC1_HUMAN	LIM and calponin homology domains-containing protein 1 OS=Homo sapiens GN=LIMCH1 PE=1 SV=4	7	1	0.809096	0.679204	0.862979	1.23595	1.35519	1.24738
431	8.65	9.52	33.57	18.2	sp|Q9UNS2|CSN3_HUMAN	COP9 signalosome complex subunit 3 OS=Homo sapiens GN=COPS3 PE=1 SV=3	7	1.36773	0.862979	0.816582	3.43558	0.981748	2.70396	1.80302
432	8.6	8.77	32.19	12.82	sp|Q9NZR1|TMOD2_HUMAN	Tropomodulin-2 OS=Homo sapiens GN=TMOD2 PE=1 SV=1	7	2.01372	2.80543	1.65959	1.36773	3.43558	1.55597	1.57036
433	8.51	8.61	27.34	17.3	sp|P46926|GNPI1_HUMAN	Glucosamine-6-phosphate isomerase 1 OS=Homo sapiens GN=GNPDA1 PE=1 SV=1	7	0.428549	0.679204	1.10662	0.570164	0.0570164	0.340408	0.963829
434	8.37	9.92	14.26	8.837	sp|O14576|DC1I1_HUMAN	Cytoplasmic dynein 1 intermediate chain 1 OS=Homo sapiens GN=DYNC1I1 PE=1 SV=2	7	1.23595	1.08643	1.11686	1.00925	1.18032	1.13763	1.00925
435	8.28	9.53	35.92	26.21	sp|P11233|RALA_HUMAN	Ras-related protein Ral-A OS=Homo sapiens GN=RALA PE=1 SV=1	7	4.74242	1.8197	3.34195	1.65959	1.19124	2.10863	1.8197
436	8.1	10.12	31.94	29.32	sp|P60953|CDC42_HUMAN	Cell division control protein 42 homolog OS=Homo sapiens GN=CDC42 PE=1 SV=2	7	2.51189	1.21339	0.12942	3.0761	1.69044	1.87068	3.7325
437	8.1	8.56	36.78	19.92	sp|Q969G5|PRDBP_HUMAN	Protein kinase C delta-binding protein OS=Homo sapiens GN=PRKCDBP PE=1 SV=3	7	1.59956	1.25893	0.937562	0.691831	0.654636	0.831764	0.928966
438	7.87	8.03	18.65	5.901	sp|Q10567|AP1B1_HUMAN	AP-1 complex subunit beta-1 OS=Homo sapiens GN=AP1B1 PE=1 SV=2	7	0.912011	0.570164	0.363078	1.57036	0.461318	1.45881	1.64437
439	7.76	8.17	25.89	19.04	sp|Q92597|NDRG1_HUMAN	Protein NDRG1 OS=Homo sapiens GN=NDRG1 PE=1 SV=1	7	1.59956	1.57036	1.87068	4.96592	3.04789	4.52898	2.83139
440	7.73	12.45	41.13	20.69	sp|P62195|PRS8_HUMAN	26S protease regulatory subunit 8 OS=Homo sapiens GN=PSMC5 PE=1 SV=1	7	1.01859	1.04713	1.10662	1.15878	1.23595	1.22462	1.09648
441	7.69	7.77	39.51	32.68	sp|Q9Y5Z4|HEBP2_HUMAN	Heme-binding protein 2 OS=Homo sapiens GN=HEBP2 PE=1 SV=1	7	1.33045	1.77011	1.47231	1.40605	0.824138	1.14815	0.946237
442	7.62	10	23.94	13.3	sp|Q9UNM6|PSD13_HUMAN	26S proteasome non-ATPase regulatory subunit 13 OS=Homo sapiens GN=PSMD13 PE=1 SV=2	7	0.457088	0.448745	0.277971	1.44544	0.731139	1.1272	1.1272
443	7.3	10.75	32.93	15.57	sp|P07195|LDHB_HUMAN	L-lactate dehydrogenase B chain OS=Homo sapiens GN=LDHB PE=1 SV=2	7	0.185353	0.0334195	0.0990832	1.57036	0.698232	0.870964	1
444	6	8	25.41	21.08	sp|P14209|CD99_HUMAN	CD99 antigen OS=Homo sapiens GN=CD99 PE=1 SV=1	7	1.33045	1.88799	1.36773	1.15878	1.21339	1.0666	1.22462
445	6	6	33.85	24.62	tr|E9PR17|E9PR17_HUMAN	CD59 glycoprotein OS=Homo sapiens GN=CD59 PE=1 SV=1	7	3.90841	8.70964	3.10456	2.22844	2.99226	3.83707	2.60615
446	5.79	8.26	57.69	36.15	sp|Q15121|PEA15_HUMAN	Astrocytic phosphoprotein PEA-15 OS=Homo sapiens GN=PEA15 PE=1 SV=2	7	1.69044	2.96483	2.42103	2.24905	3.80189	3.49945	1.55597
447	5.54	5.73	28.86	15.92	sp|Q15363|TMED2_HUMAN	Transmembrane emp24 domain-containing protein 2 OS=Homo sapiens GN=TMED2 PE=1 SV=1	7	9.12011	5.34564	5.05825	2.85759	7.65597	3.53183	3.69828
448	4.75	6.03	63.01	46.58	sp|P32320|CDD_HUMAN	Cytidine deaminase OS=Homo sapiens GN=CDA PE=1 SV=2	7	0.0432514	0.0405509	0.169044	0.0394457	0.0113763	0.0737904	0.113763
449	4.45	10.88	47.57	35.68	tr|F5H157|F5H157_HUMAN	Ras-related protein Rab-35 (Fragment) OS=Homo sapiens GN=RAB35 PE=1 SV=1	7	1.13763	0.855067	0.963829	1.01859	0.83946	1.25893	1.43219
450	2.24	9.62	37.33	14.75	sp|P13929|ENOB_HUMAN	Beta-enolase OS=Homo sapiens GN=ENO3 PE=1 SV=5	7	0.679204	0.870964	0.83946	1.02802	0.608135	0.758578	0.855067
451	2.08	12.24	40.41	34.72	sp|P37235|HPCL1_HUMAN	Hippocalcin-like protein 1 OS=Homo sapiens GN=HPCAL1 PE=1 SV=3	7
452	2	10.96	39.3	27.51	tr|A0A087X1V2|A0A087X1V2_HUMAN	Neural cell adhesion molecule 1 (Fragment) OS=Homo sapiens GN=NCAM1 PE=1 SV=3	7	0.787046	0.824138	0.870964	0.539511	0.660693	0.613762	1.04713
453	2	5.23	24.6	12.46	sp|Q7L523|RRAGA_HUMAN	Ras-related GTP-binding protein A OS=Homo sapiens GN=RRAGA PE=1 SV=1	7	0.731139	0.654636	0.824138	0.816582	0.654636	0.751623	0.862979
454	1.64	7.06	17.59	1.908	sp|P13533|MYH6_HUMAN	Myosin-6 OS=Homo sapiens GN=MYH6 PE=1 SV=5	7	0.0654636	0.11272	1.10662	0.544503	0.483059	0.139316	0.210863
455	12.49	12.6	25.46	12.11	sp|Q9UNW1|MINP1_HUMAN	Multiple inositol polyphosphate phosphatase 1 OS=Homo sapiens GN=MINPP1 PE=1 SV=1	6	3.80189	5.54626	2.48886	1.21339	4.7863	0.816582	0.679204
456	12.46	12.48	30.02	12.96	sp|Q9Y230|RUVB2_HUMAN	RuvB-like 2 OS=Homo sapiens GN=RUVBL2 PE=1 SV=3	6	0.704693	0.630957	0.440555	1.25893	0.765597	0.679204	0.895365
457	12.03	12.2	34.93	16.91	sp|O75663|TIPRL_HUMAN	TIP41-like protein OS=Homo sapiens GN=TIPRL PE=1 SV=2	6	0.188799	0.115878	0.207014	0.483059	0.049204	0.272898	1.04713
458	12	12	48.37	34.42	sp|P20339|RAB5A_HUMAN	Ras-related protein Rab-5A OS=Homo sapiens GN=RAB5A PE=1 SV=2	6	1.04713	0.824138	0.928966	1.22462	0.704693	0.870964	1.02802
459	11.98	11.97	31.42	22.36	sp|Q15293|RCN1_HUMAN	Reticulocalbin-1 OS=Homo sapiens GN=RCN1 PE=1 SV=1	6	2.22844	2.99226	1.31826	0.387258	0.744732	0.428549	0.717794
460	11.77	11.96	28.31	13.84	sp|P30566|PUR8_HUMAN	Adenylosuccinate lyase OS=Homo sapiens GN=ADSL PE=1 SV=2	6	0.109648	0.0685488	0.0963829	0.887156	0.242103	0.597035	1.18032
461	11.57	11.64	36.04	25.8	sp|P21796|VDAC1_HUMAN	Voltage-dependent anion-selective channel protein 1 OS=Homo sapiens GN=VDAC1 PE=1 SV=2	6	9.72747	10.666	13.9316	9.90832	9.63829	5.7544	6.54636
462	11.3	11.78	46.78	27.47	tr|B5MDF5|B5MDF5_HUMAN	GTP-binding nuclear protein Ran OS=Homo sapiens GN=RAN PE=1 SV=1	6	0.231206	0.515229	0.272898	1.52757	0.787046	1.87068	1.40605
463	11.25	11.29	49.72	35.91	sp|Q13442|HAP28_HUMAN	28 kDa heat- and acid-stable phosphoprotein OS=Homo sapiens GN=PDAP1 PE=1 SV=1	6	0.816582	2.51189	3.28095	0.679204	0.737904	0.654636	0.990832
464	10.99	11.03	37.3	30.81	tr|A8K878|A8K878_HUMAN	Mesencephalic astrocyte-derived neurotrophic factor OS=Homo sapiens GN=MANF PE=2 SV=1	6	5.49541	11.9124	6.66807	3.19154	2.77971	2.33346	3.01995
465	10.89	11.07	28.94	13.82	sp|P61978|HNRPK_HUMAN	Heterogeneous nuclear ribonucleoprotein K OS=Homo sapiens GN=HNRNPK PE=1 SV=1	6	0.990832	1.02802	0.954993	0.717794	1.6293	1.0666	0.824138
466	10.73	10.75	43.53	23.71	tr|A6NFX8|A6NFX8_HUMAN	ADP-sugar pyrophosphatase OS=Homo sapiens GN=NUDT5 PE=1 SV=1	6	0.436516	0.862979	1.19124	0.862979	0.301995	0.524807	0.731139
467	10.69	10.75	22.78	12.24	sp|P55084|ECHB_HUMAN	Trifunctional enzyme subunit beta, mitochondrial OS=Homo sapiens GN=HADHB PE=1 SV=3	6	1.15878	0.591562	0.524807	1.09648	2.01372	1.24738	1.21339
468	10.68	11.86	21.27	12.47	sp|P54727|RD23B_HUMAN	UV excision repair protein RAD23 homolog B OS=Homo sapiens GN=RAD23B PE=1 SV=1	6	1.51356	2.14783	2.12814	1.09648	1.67494	1.19124	1.35519
469	10.39	10.63	40.53	33.71	sp|P28070|PSB4_HUMAN	Proteasome subunit beta type-4 OS=Homo sapiens GN=PSMB4 PE=1 SV=4	6	0.285759	0.465586	0.731139	0.42462	0.102802	0.224905	0.496592
470	10.29	10.75	35.99	26.64	sp|P00491|PNPH_HUMAN	Purine nucleoside phosphorylase OS=Homo sapiens GN=PNP PE=1 SV=2	6	0.267917	0.452898	0.331131	1.0666	0.226986	1	2.10863
471	10	10.02	33.18	30.84	sp|P30044|PRDX5_HUMAN	Peroxiredoxin-5, mitochondrial OS=Homo sapiens GN=PRDX5 PE=1 SV=4	6	6.42688	6.60693	4.7863	6.19441	7.58578	8.62979	6.08135
472	9.97	10.02	42.53	26.44	sp|O15400|STX7_HUMAN	Syntaxin-7 OS=Homo sapiens GN=STX7 PE=1 SV=4	6	6.30957	5.39511	5.54626	3.22107	2.96483	2.29087	0.409261
473	9.66	9.69	39.75	27.46	sp|Q9Y224|CN166_HUMAN	UPF0568 protein C14orf166 OS=Homo sapiens GN=C14orf166 PE=1 SV=1	6	4.44631	6.79204	4.7863	2.10863	3.19154	4.52898	3.37287
474	9.46	9.48	28.57	19.44	tr|G3V5Z7|G3V5Z7_HUMAN	Proteasome subunit alpha type OS=Homo sapiens GN=PSMA6 PE=1 SV=1	6	0.334195	1.5417	1.78649	1.44544	0.194089	0.420727	0.636796
475	9.4	9.54	20.72	7.692	sp|O14744|ANM5_HUMAN	Protein arginine N-methyltransferase 5 OS=Homo sapiens GN=PRMT5 PE=1 SV=4	6	0.214783	0.515229	0.376704	1.88799	0.660693	1.31826	1.48594
476	9.25	11.31	31.16	26.05	sp|P61106|RAB14_HUMAN	Ras-related protein Rab-14 OS=Homo sapiens GN=RAB14 PE=1 SV=4	6	1.92309	1.15878	1.2942	2.58226	1.25893	1.43219	1.52757
477	9.21	9.36	24.09	7.292	sp|Q13618|CUL3_HUMAN	Cullin-3 OS=Homo sapiens GN=CUL3 PE=1 SV=2	6	0.366438	0.139316	0.1	2.12814	0.660693	1.34276	2.22844
478	9.09	9.97	31.58	13.16	sp|Q9Y265|RUVB1_HUMAN	RuvB-like 1 OS=Homo sapiens GN=RUVBL1 PE=1 SV=1	6	1.28233	0.954993	0.591562	3.56451	2.1677	2.24905	2.208
479	8.96	9.06	41.55	26.03	sp|P10412|H14_HUMAN	Histone H1.4 OS=Homo sapiens GN=HIST1H1E PE=1 SV=2	6	2.18776	3.53183	1.38038	1.04713	1.6293	1.38038	1.34276
480	8.96	8.98	18.79	7.747	tr|E9PRY8|E9PRY8_HUMAN	Elongation factor 1-delta OS=Homo sapiens GN=EEF1D PE=1 SV=1	6	17.378	20.7014	17.2187	5.05825	23.9883	12.942	7.94328
481	8.75	9.14	14.96	3.894	sp|P23229|ITA6_HUMAN	Integrin alpha-6 OS=Homo sapiens GN=ITGA6 PE=1 SV=5	6	17.0608	6.08135	3.83707	2.85759	7.65597	5.86138	9.46237
482	8.69	9.32	50	25.51	tr|A0A087X2I2|A0A087X2I2_HUMAN	Glutathione peroxidase OS=Homo sapiens GN=GPX4 PE=1 SV=1	6	0.353183	0.242103	0.879023	1.72187	0.0534564	0.731139	2.0893
483	8.62	8.64	23.66	15.37	sp|Q9NZA1|CLIC5_HUMAN	Chloride intracellular channel protein 5 OS=Homo sapiens GN=CLIC5 PE=1 SV=3	6	9.72747	3.90841	1.48594	0.937562	2.44343	12.4738	3.7325
484	8.58	8.63	27.75	15.31	sp|P61158|ARP3_HUMAN	Actin-related protein 3 OS=Homo sapiens GN=ACTR3 PE=1 SV=3	6	0.928966	0.21677	0.0519996	2.72898	1.05682	2.65461	1.48594
485	8.55	8.62	58.39	39.42	sp|P52758|UK114_HUMAN	Ribonuclease UK114 OS=Homo sapiens GN=HRSP12 PE=1 SV=1	6	0.636796	0.737904	0.691831	0.597035	0.390841	0.559758	0.801678
486	8.54	8.67	20.41	7.993	tr|Q5H909|Q5H909_HUMAN	Melanoma-associated antigen D2 OS=Homo sapiens GN=MAGED2 PE=1 SV=2	6	1.6293	1.21339	1.39316	1.40605	1.34276	2.01372	1.38038
487	8.43	8.59	25.9	14.39	tr|K7ELJ7|K7ELJ7_HUMAN	Calpain small subunit 1 OS=Homo sapiens GN=CAPNS1 PE=1 SV=1	6	10.666	7.44732	7.65597	14.1906	4.7863	6.60693	5.19996
488	8.36	9.97	23.57	9.979	tr|C9JFE4|C9JFE4_HUMAN	COP9 signalosome complex subunit 1 OS=Homo sapiens GN=GPS1 PE=1 SV=2	6	0.625173	0.346737	0.428549	1.1695	0.539511	0.963829	1.1272
489	8.32	12.4	44	29.5	sp|P61026|RAB10_HUMAN	Ras-related protein Rab-10 OS=Homo sapiens GN=RAB10 PE=1 SV=1	6	2.26986	0.772681	0.672977	1.57036	1.10662	2.60615	2.53513
490	8.25	10.34	38.87	24.92	sp|P00387|NB5R3_HUMAN	NADH-cytochrome b5 reductase 3 OS=Homo sapiens GN=CYB5R3 PE=1 SV=3	6	1.39316	0.765597	0.258226	1.87068	2.39883	4.32514	2.58226
491	8.12	10.25	36.65	25.13	sp|P84095|RHOG_HUMAN	Rho-related GTP-binding protein RhoG OS=Homo sapiens GN=RHOG PE=1 SV=1	6	1.92309	1.38038	0.559758	0.981748	2.14783	1.94089	1.39316
492	8.09	10.39	19.25	14.09	sp|P78324|SHPS1_HUMAN	Tyrosine-protein phosphatase non-receptor type substrate 1 OS=Homo sapiens GN=SIRPA PE=1 SV=2	6	1.15878	1.45881	0.630957	0.487529	0.60256	0.801678	0.77983
493	8.07	9.72	20.75	10.67	sp|Q96JB5|CK5P3_HUMAN	CDK5 regulatory subunit-associated protein 3 OS=Homo sapiens GN=CDK5RAP3 PE=1 SV=2	6	1.34276	1.14815	0.77983	1.19124	1.55597	1.07647	1.30617
494	8.04	8.49	31.1	13.4	sp|P50454|SERPH_HUMAN	Serpin H1 OS=Homo sapiens GN=SERPINH1 PE=1 SV=2	6	2.26986	2.05116	0.608135	1.72187	4.48745	2.12814	1.94089
495	8.02	8.21	15.9	8.376	sp|Q08380|LG3BP_HUMAN	Galectin-3-binding protein OS=Homo sapiens GN=LGALS3BP PE=1 SV=1	6	9.12011	5.01187	7.72681	11.5878	18.0302	6.54636	1.18032
496	8	12.3	49.44	31.67	sp|P18085|ARF4_HUMAN	ADP-ribosylation factor 4 OS=Homo sapiens GN=ARF4 PE=1 SV=3	6	0.77983	0.428549	0.483059	1.36773	0.613762	1.1272	1.57036
497	7.9	7.99	24	19.56	sp|P24534|EF1B_HUMAN	Elongation factor 1-beta OS=Homo sapiens GN=EEF1B2 PE=1 SV=3	6	6.25173	8.09096	7.31139	2.24905	9.63829	3.69828	2.60615
498	7.86	10	29.81	22.05	sp|Q9H9B4|SFXN1_HUMAN	Sideroflexin-1 OS=Homo sapiens GN=SFXN1 PE=1 SV=4	6	0.801678	0.946237	0.92045	0.824138	1.00925	0.981748	0.855067
499	7.77	10.02	19.26	5.738	sp|P29317|EPHA2_HUMAN	Ephrin type-A receptor 2 OS=Homo sapiens GN=EPHA2 PE=1 SV=2	6	0.724436	0.448745	0.428549	0.928966	0.903649	1.03753	1.24738
500	7.41	7.69	26.28	13.46	sp|Q99747|SNAG_HUMAN	Gamma-soluble NSF attachment protein OS=Homo sapiens GN=NAPG PE=1 SV=1	6	1.07647	1.07647	1	0.963829	1.03753	0.937562	1
501	7.22	7.43	23.47	17.69	sp|P29218|IMPA1_HUMAN	Inositol monophosphatase 1 OS=Homo sapiens GN=IMPA1 PE=1 SV=1	6	0.398107	0.346737	0.325087	0.887156	0.0937562	0.83946	1.01859
502	7.13	7.42	29.55	18.81	sp|O76003|GLRX3_HUMAN	Glutaredoxin-3 OS=Homo sapiens GN=GLRX3 PE=1 SV=2	6	1.43219	0.744732	0.625173	0.954993	2.01372	1.92309	1.25893
503	7.11	9.66	30.07	15.03	sp|Q8IVM0|CCD50_HUMAN	Coiled-coil domain-containing protein 50 OS=Homo sapiens GN=CCDC50 PE=1 SV=1	6	1.67494	2.37684	3.25087	1.27057	1.24738	1.1272	1.83654
504	6.74	6.83	38.41	20.32	sp|O43852|CALU_HUMAN	Calumenin OS=Homo sapiens GN=CALU PE=1 SV=2	6	10.9648	11.8032	7.7983	4.09261	8.55067	1.85353	3.31131
505	6.65	6.88	20.33	10.44	sp|P53990|IST1_HUMAN	IST1 homolog OS=Homo sapiens GN=IST1 PE=1 SV=1	6	1.88799	1.45881	1.77011	1.87068	0.57544	0.452898	0.772681
506	6.38	6.46	66.99	50.49	sp|P62805|H4_HUMAN	Histone H4 OS=Homo sapiens GN=HIST1H4A PE=1 SV=2	6	2.88403	3.94457	3.66438	4.44631	4.2462	3.10456	1.92309
507	6.14	7.28	44.57	25	sp|P61224|RAP1B_HUMAN	Ras-related protein Rap-1b OS=Homo sapiens GN=RAP1B PE=1 SV=1	6	0.83946	0.879023	0.847227	0.879023	0.981748	0.862979	0.954993
508	6.1	6.86	28.72	13.1	sp|Q9BWD1|THIC_HUMAN	Acetyl-CoA acetyltransferase, cytosolic OS=Homo sapiens GN=ACAT2 PE=1 SV=2	6	0.18197	0.253513	0.49204	0.263027	0.152757	0.248886	0.390841
509	6.02	10.38	16.4	5.757	sp|P18084|ITB5_HUMAN	Integrin beta-5 OS=Homo sapiens GN=ITGB5 PE=1 SV=1	6	1.31826	1.19124	1.1695	0.654636	0.648634	0.60256	0.801678
510	6	10	42.79	28.84	sp|P61020|RAB5B_HUMAN	Ras-related protein Rab-5B OS=Homo sapiens GN=RAB5B PE=1 SV=1	6	4.28549	3.04789	2.91072	8.3946	2.96483	5.39511	3.28095
511	6	6.13	54.92	27.05	sp|O60925|PFD1_HUMAN	Prefoldin subunit 1 OS=Homo sapiens GN=PFDN1 PE=1 SV=2	6	0.83946	3.10456	3.22107	0.505825	0.751623	0.801678	0.847227
512	5.92	7.19	19.66	7.524	sp|O60884|DNJA2_HUMAN	DnaJ homolog subfamily A member 2 OS=Homo sapiens GN=DNAJA2 PE=1 SV=1	6	1.59956	0.879023	1.49968	1.52757	0.226986	1.57036	1.11686
513	5.91	8.56	38.8	22.95	sp|P10114|RAP2A_HUMAN	Ras-related protein Rap-2a OS=Homo sapiens GN=RAP2A PE=1 SV=1	6	1.04713	0.409261	0.265461	0.879023	1.14815	1.02802	0.60256
514	5.53	10.55	31.35	14.73	sp|P09525|ANXA4_HUMAN	Annexin A4 OS=Homo sapiens GN=ANXA4 PE=1 SV=4	6	2.26986	0.981748	0.737904	1.48594	0.691831	1.43219	0.954993
515	5.52	6.98	16.9	5.862	sp|P50570|DYN2_HUMAN	Dynamin-2 OS=Homo sapiens GN=DNM2 PE=1 SV=2	6	0.432514	0.409261	0.501187	0.625173	0.452898	0.879023	1.02802
516	5.42	7.86	18.5	3.95	sp|O60763|USO1_HUMAN	General vesicular transport factor p115 OS=Homo sapiens GN=USO1 PE=1 SV=2	6	0.954993	0.963829	0.990832	1.05682	1.04713	0.990832	1.02802
517	5.01	7.52	14.91	2.826	sp|P01024|CO3_HUMAN	Complement C3 OS=Homo sapiens GN=C3 PE=1 SV=2	6	0.275423	0.121339	0.145881	1.07647	0.0946237	0.524807	0.248886
518	5	7.31	38.73	19.65	tr|G3V1D4|G3V1D4_HUMAN	Lin-7 homolog C (C. elegans), isoform CRA_b OS=Homo sapiens GN=LIN7C PE=1 SV=1	6	1.05682	2.1677	1.94089	0.120226	1.34276	0.0887156	0.824138
519	4.44	6.58	32.05	21.37	sp|P25787|PSA2_HUMAN	Proteasome subunit alpha type-2 OS=Homo sapiens GN=PSMA2 PE=1 SV=2	6	2.208	2.26986	2.35505	2.12814	0.642688	1.24738	1.05682
520	4.19	4.4	22.38	5.949	tr|Q5T2B5|Q5T2B5_HUMAN	Cullin-2 OS=Homo sapiens GN=CUL2 PE=1 SV=1	6	0.452898	0.544503	0.591562	1.7378	0.570164	1.27057	1.80302
521	4	11.32	43.54	43.54	sp|P02042|HBD_HUMAN	Hemoglobin subunit delta OS=Homo sapiens GN=HBD PE=1 SV=2	6	0.510505	0.285759	1.34276	1.10662	0.0636796	0.436516	3.53183
522	3.95	7.64	12.54	1.893	sp|Q12756|KIF1A_HUMAN	Kinesin-like protein KIF1A OS=Homo sapiens GN=KIF1A PE=1 SV=2	6	0.337287	0.331131	0.49204	0.444631	0.524807	0.685488	1.18032
523	3.84	10.14	20.37	9.491	sp|Q04695|K1C17_HUMAN	Keratin, type I cytoskeletal 17 OS=Homo sapiens GN=KRT17 PE=1 SV=2	6	1.11686	0.420727	0.704693	0.981748	0.233346	0.731139	0.895365
524	3.42	3.67	13.09	2.38	sp|Q9Y6D6|BIG1_HUMAN	Brefeldin A-inhibited guanine nucleotide-exchange protein 1 OS=Homo sapiens GN=ARFGEF1 PE=1 SV=2	6	1.07647	0.92045	0.83946	0.937562	1.14815	0.83946	1.08643
525	3.08	3.22	8.607	2.596	sp|P02452|CO1A1_HUMAN	Collagen alpha-1(I) chain OS=Homo sapiens GN=COL1A1 PE=1 SV=5	6	1.30617	1.78649	1.59956	0.855067	1.07647	0.794328	0.887156
526	2.6	9.32	19.39	8.036	sp|Q01813|PFKAP_HUMAN	ATP-dependent 6-phosphofructokinase, platelet type OS=Homo sapiens GN=PFKP PE=1 SV=2	6	0.519996	0.787046	0.83946	0.666807	0.474242	0.549541	0.912011
527	2.57	3.52	15.02	3.504	sp|Q9Y4L1|HYOU1_HUMAN	Hypoxia up-regulated protein 1 OS=Homo sapiens GN=HYOU1 PE=1 SV=1	6	0.847227	0.758578	0.744732	0.772681	1.08643	0.765597	0.824138
528	5.24	6.9	12.95	2.388	sp|P06213|INSR_HUMAN	Insulin receptor OS=Homo sapiens GN=INSR PE=1 SV=4	6	0.954993	0.879023	0.737904	0.717794	1.38038	1.01859	1.01859
529	11.01	11.08	38.31	22.89	sp|Q96FZ7|CHMP6_HUMAN	Charged multivesicular body protein 6 OS=Homo sapiens GN=CHMP6 PE=1 SV=3	5	1.5417	0.928966	0.862979	1.07647	0.570164	1.38038	0.580764
530	10.89	10.91	18.12	9.061	sp|P04843|RPN1_HUMAN	Dolichyl-diphosphooligosaccharide--protein glycosyltransferase subunit 1 OS=Homo sapiens GN=RPN1 PE=1 SV=1	5	3.66438	1.59956	0.787046	1.51356	6.42688	1.78649	3.43558
531	10.8	10.92	17.68	4.261	sp|P54289|CA2D1_HUMAN	Voltage-dependent calcium channel subunit alpha-2/delta-1 OS=Homo sapiens GN=CACNA2D1 PE=1 SV=3	5	2.12814	0.895365	0.346737	1.87068	1.30617	2.85759	1.8197
532	10.56	10.64	24.32	12.95	sp|P62191|PRS4_HUMAN	26S protease regulatory subunit 4 OS=Homo sapiens GN=PSMC1 PE=1 SV=1	5	0.679204	1.24738	0.679204	1.64437	1.47231	1.7378	1.64437
533	10.21	10.71	34.21	17.67	sp|P62424|RL7A_HUMAN	60S ribosomal protein L7a OS=Homo sapiens GN=RPL7A PE=1 SV=2	5	0.534564	0.737904	0.496592	0.559758	1.94089	0.903649	0.83946
534	10.19	10.24	21.86	12.79	sp|Q9UJU6|DBNL_HUMAN	Drebrin-like protein OS=Homo sapiens GN=DBNL PE=1 SV=1	5	1.87068	1.0666	1.30617	1.04713	3.0761	2.65461	1.61436
535	10.06	10.17	19.19	6.443	tr|J3KPM9|J3KPM9_HUMAN	Signal transducer and activator of transcription OS=Homo sapiens GN=STAT1 PE=1 SV=1	5	0.809096	0.963829	0.870964	0.862979	0.981748	0.928966	0.862979
536	10.03	10.03	25.28	17.98	sp|Q12907|LMAN2_HUMAN	Vesicular integral-membrane protein VIP36 OS=Homo sapiens GN=LMAN2 PE=1 SV=1	5	2.85759	1.87068	1.69044	2.53513	1.75388	1.61436	1.52757
537	10.02	10.03	28.49	19.19	sp|Q9UJ70|NAGK_HUMAN	N-acetyl-D-glucosamine kinase OS=Homo sapiens GN=NAGK PE=1 SV=4	5	0.510505	0.570164	0.672977	0.787046	0.398107	0.824138	1.24738
538	10.01	10.05	27.52	21.32	sp|O95336|6PGL_HUMAN	6-phosphogluconolactonase OS=Homo sapiens GN=PGLS PE=1 SV=2	5	0.0597035	0.128233	0.0201372	0.255859	0.158489	0.353183	0.772681
539	10.01	10.03	13.75	8.516	sp|Q9UGT4|SUSD2_HUMAN	Sushi domain-containing protein 2 OS=Homo sapiens GN=SUSD2 PE=1 SV=1	5	0.963829	0.92045	1.04713	0.937562	0.981748	0.972747	0.937562
540	10	10.02	28.03	22.61	sp|Q96HY6|DDRGK_HUMAN	DDRGK domain-containing protein 1 OS=Homo sapiens GN=DDRGK1 PE=1 SV=2	5	2.24905	2.63027	1.88799	1.1695	1.57036	0.855067	1.09648
541	10	10.01	28.36	16.08	sp|Q96C23|GALM_HUMAN	Aldose 1-epimerase OS=Homo sapiens GN=GALM PE=1 SV=1	5	0.293765	0.630957	1.11686	0.625173	0.190546	0.519996	1.22462
542	10	10	26.69	18.4	sp|O75190|DNJB6_HUMAN	DnaJ homolog subfamily B member 6 OS=Homo sapiens GN=DNAJB6 PE=1 SV=2	5	1	1.22462	0.928966	0.801678	1.75388	1.41906	0.809096
543	9.98	10.03	50	33.12	sp|Q9UHV9|PFD2_HUMAN	Prefoldin subunit 2 OS=Homo sapiens GN=PFDN2 PE=1 SV=1	5	6.25173	10.1859	6.08135	0.744732	5.80764	2.91072	2.77971
544	9.74	9.84	28.55	7.742	tr|J9JID7|J9JID7_HUMAN	Lamin B2, isoform CRA_a OS=Homo sapiens GN=LMNB2 PE=1 SV=1	5	0.847227	0.60256	0.591562	0.648634	0.801678	0.608135	0.794328
545	9.72	9.76	27.19	11.69	sp|P60228|EIF3E_HUMAN	Eukaryotic translation initiation factor 3 subunit E OS=Homo sapiens GN=EIF3E PE=1 SV=1	5	0.376704	0.428549	0.152757	1.57036	0.597035	1.24738	1.52757
546	9.64	9.7	45.77	21.39	sp|P49721|PSB2_HUMAN	Proteasome subunit beta type-2 OS=Homo sapiens GN=PSMB2 PE=1 SV=1	5	0.413047	2.10863	1.83654	1.7378	0.428549	0.625173	1.33045
547	9.61	9.64	28.29	18.86	sp|P46976|GLYG_HUMAN	Glycogenin-1 OS=Homo sapiens GN=GYG1 PE=1 SV=4	5	0.283139	1.8197	0.816582	0.972747	0.401791	0.751623	0.855067
548	9.52	9.56	51.32	30.92	sp|P62269|RS18_HUMAN	40S ribosomal protein S18 OS=Homo sapiens GN=RPS18 PE=1 SV=3	5	1.04713	0.981748	0.758578	0.679204	1.40605	0.544503	0.570164
549	9.47	9.54	27.99	16.03	sp|Q99536|VAT1_HUMAN	Synaptic vesicle membrane protein VAT-1 homolog OS=Homo sapiens GN=VAT1 PE=1 SV=2	5	4.36516	3.19154	2.10863	3.40408	3.69828	2.65461	3.66438
550	9.39	9.5	30.8	20.98	tr|J3KS22|J3KS22_HUMAN	L-xylulose reductase (Fragment) OS=Homo sapiens GN=DCXR PE=1 SV=5	5	0.564937	0.597035	0.704693	1.00925	0.704693	0.92045	1.02802
551	9.34	9.7	33.86	26.98	sp|Q13938|CAYP1_HUMAN	Calcyphosin OS=Homo sapiens GN=CAPS PE=1 SV=1	5	4.96592	8.31764	7.94328	4.36516	2.88403	4.61318	3.16228
552	9.1	9.47	19.68	10.07	tr|E7EPK1|E7EPK1_HUMAN	Septin-7 OS=Homo sapiens GN=SEPT7 PE=1 SV=2	5	1.31826	1.38038	2.01372	0.630957	0.801678	1	0.698232
553	9.07	9.38	20.76	4.855	sp|P49588|SYAC_HUMAN	Alanine--tRNA ligase, cytoplasmic OS=Homo sapiens GN=AARS PE=1 SV=2	5	0.248886	0.420727	0.60256	0.895365	0.457088	0.946237	1.1272
554	9.02	9.11	16.23	9.736	sp|P12955|PEPD_HUMAN	Xaa-Pro dipeptidase OS=Homo sapiens GN=PEPD PE=1 SV=3	5	0.444631	0.529663	0.648634	0.549541	0.383707	0.501187	0.591562
555	8.9	9.08	24.03	7.955	tr|E7EX17|E7EX17_HUMAN	Eukaryotic translation initiation factor 4B OS=Homo sapiens GN=EIF4B PE=1 SV=1	5	2.26986	7.24436	7.65597	1.48594	2.01372	1.58489	1.92309
556	8.76	9.46	17.6	6.782	tr|E7EVY3|E7EVY3_HUMAN	Calpastatin OS=Homo sapiens GN=CAST PE=1 SV=1	5	4.52898	8.3946	6.98232	3.10456	5.44503	2.53513	1.36773
557	8.74	8.76	18.43	10.22	sp|O43776|SYNC_HUMAN	Asparagine--tRNA ligase, cytoplasmic OS=Homo sapiens GN=NARS PE=1 SV=1	5	1.35519	1.19124	0.366438	2.93765	1.94089	2.10863	1.99526
558	8.73	10.8	28.75	11.5	sp|Q9BTV4|TMM43_HUMAN	Transmembrane protein 43 OS=Homo sapiens GN=TMEM43 PE=1 SV=1	5	4.9204	4.13048	3.59749	2.48886	4.65586	1.90546	2.77971
559	8.58	8.99	22.2	11.92	sp|Q9C0E8|LNP_HUMAN	Protein lunapark OS=Homo sapiens GN=LNP PE=1 SV=2	5	1.94089	1.87068	1.43219	0.862979	2.10863	0.824138	1.47231
560	8.38	9.74	44.17	31.55	sp|O43399|TPD54_HUMAN	Tumor protein D54 OS=Homo sapiens GN=TPD52L2 PE=1 SV=2	5	2.58226	3.98107	3.19154	1.23595	3.49945	1.47231	1.99526
561	8.35	8.46	24.62	14.32	sp|Q8N2K0|ABD12_HUMAN	Monoacylglycerol lipase ABHD12 OS=Homo sapiens GN=ABHD12 PE=1 SV=2	5	7.51623	3.22107	2.60615	1.72187	7.04693	3.59749	2.46604
562	8.21	8.22	41.49	29.26	tr|Q5W0H4|Q5W0H4_HUMAN	Translationally-controlled tumor protein OS=Homo sapiens GN=TPT1 PE=1 SV=1	5	1.38038	1.51356	0.963829	1.40605	2.51189	2.39883	1.75388
563	8.21	8.22	41.38	25.52	sp|P39019|RS19_HUMAN	40S ribosomal protein S19 OS=Homo sapiens GN=RPS19 PE=1 SV=2	5	5.80764	7.44732	3.69828	2.72898	9.37562	3.53183	2.67917
564	8.15	8.24	38.57	22.87	sp|Q96CT7|CC124_HUMAN	Coiled-coil domain-containing protein 124 OS=Homo sapiens GN=CCDC124 PE=1 SV=1	5	1.75388	3.53183	3.34195	0.461318	1.59956	0.172187	1.13763
565	8.12	9.23	29.45	17.12	sp|Q14165|MLEC_HUMAN	Malectin OS=Homo sapiens GN=MLEC PE=1 SV=1	5	5.19996	5.39511	4.96592	2.0893	5.19996	1.87068	1.36773
566	8.02	8.16	22.4	15.03	sp|O00442|RTCA_HUMAN	RNA 3'-terminal phosphate cyclase OS=Homo sapiens GN=RTCA PE=1 SV=1	5	0.60256	0.529663	0.591562	1.08643	0.510505	0.912011	1.23595
567	8.01	8.17	63.53	25.88	tr|R4GN98|R4GN98_HUMAN	Protein S100 (Fragment) OS=Homo sapiens GN=S100A6 PE=1 SV=1	5	5.19996	4.20727	7.37904	5.39511	0.0529663	1.45881	0.337287
568	8	10	14.91	7.018	sp|O95302|FKBP9_HUMAN	Peptidyl-prolyl cis-trans isomerase FKBP9 OS=Homo sapiens GN=FKBP9 PE=1 SV=2	5	1.6293	1.70608	1.44544	1.19124	1.35519	1.09648	1.15878
569	8	8.17	14.39	11.41	sp|Q9NZH0|GPC5B_HUMAN	G-protein coupled receptor family C group 5 member B OS=Homo sapiens GN=GPRC5B PE=2 SV=2	5	4.9204	3.69828	1.33045	3.0761	6.0256	4.32514	1.77011
570	8	8.02	40.91	27.27	tr|J3KQ18|J3KQ18_HUMAN	D-dopachrome decarboxylase OS=Homo sapiens GN=DDT PE=1 SV=1	5	0.824138	2.1677	2.53513	0.334195	0.380189	1.03753	2.24905
571	8	8.02	29.73	17.12	tr|J3KN29|J3KN29_HUMAN	26S proteasome non-ATPase regulatory subunit 9 OS=Homo sapiens GN=PSMD9 PE=1 SV=1	5	1.2942	2.55859	5.80764	1.78649	0.946237	2.80543	1.18032
572	7.93	8.2	14.8	6.643	sp|P45974|UBP5_HUMAN	Ubiquitin carboxyl-terminal hydrolase 5 OS=Homo sapiens GN=USP5 PE=1 SV=2	5	0.539511	0.337287	0.519996	0.887156	0.322107	0.912011	0.824138
573	7.87	8.01	46.46	23.89	sp|P36543|VATE1_HUMAN	V-type proton ATPase subunit E 1 OS=Homo sapiens GN=ATP6V1E1 PE=1 SV=1	5	4.57088	5.24807	4.40555	2.53513	1.85353	2.63027	2.70396
574	7.84	8	16.88	10.76	sp|Q16204|CCDC6_HUMAN	Coiled-coil domain-containing protein 6 OS=Homo sapiens GN=CCDC6 PE=1 SV=2	5	1.23595	1.09648	1.48594	0.862979	1.02802	0.937562	1.03753
575	7.83	8.04	69.47	47.33	sp|Q9H098|F107B_HUMAN	Protein FAM107B OS=Homo sapiens GN=FAM107B PE=1 SV=1	5	0.648634	1.88799	2.35505	0.235505	1.18032	0.744732	0.416869
576	7.79	7.95	24.86	12.86	sp|P48556|PSMD8_HUMAN	26S proteasome non-ATPase regulatory subunit 8 OS=Homo sapiens GN=PSMD8 PE=1 SV=2	5	5.97035	1.59956	1.0666	4.7863	4.32514	3.19154	3.01995
577	7.77	8.39	12.9	4.035	sp|P26640|SYVC_HUMAN	Valine--tRNA ligase OS=Homo sapiens GN=VARS PE=1 SV=4	5	0.0816582	0.15417	0.172187	0.691831	0.331131	0.483059	0.887156
578	7.74	9.87	35.68	24.41	sp|Q96DA2|RB39B_HUMAN	Ras-related protein Rab-39B OS=Homo sapiens GN=RAB39B PE=1 SV=1	5	0.772681	0.416869	0.143219	0.77983	0.380189	1.08643	1.36773
579	7.65	7.77	46.25	37.08	sp|Q8TDB4|HUMMR_HUMAN	Protein MGARP OS=Homo sapiens GN=MGARP PE=1 SV=1	5	1.90546	2.0893	1.18032	0.801678	1.78649	0.862979	1.11686
580	7.59	7.73	62.67	61.33	sp|Q8WUW1|BRK1_HUMAN	Protein BRICK1 OS=Homo sapiens GN=BRK1 PE=1 SV=1	5	2.77971	3.59749	2.75423	0.990832	1.27057	1.22462	0.794328
581	7.55	7.67	16.2	6.901	sp|P48147|PPCE_HUMAN	Prolyl endopeptidase OS=Homo sapiens GN=PREP PE=1 SV=2	5	0.325087	0.42462	0.679204	0.928966	0.251189	0.698232	0.954993
582	7.52	7.6	18.63	7.481	sp|P49748|ACADV_HUMAN	Very long-chain specific acyl-CoA dehydrogenase, mitochondrial OS=Homo sapiens GN=ACADVL PE=1 SV=1	5	4.48745	5.97035	7.17794	2.99226	3.98107	1.55597	3.46737
583	7.46	7.74	28.7	14.2	tr|E5RHW4|E5RHW4_HUMAN	Erlin-2 (Fragment) OS=Homo sapiens GN=ERLIN2 PE=1 SV=1	5	1.34276	0.772681	0.539511	1.55597	4.69894	1.59956	1.99526
584	7.39	10.01	29.77	15.21	sp|Q9HA64|KT3K_HUMAN	Ketosamine-3-kinase OS=Homo sapiens GN=FN3KRP PE=1 SV=2	5	0.253513	0.343558	0.296483	1.43219	0.630957	1.47231	0.685488
585	7.33	7.21	19.04	7.895	sp|P43121|MUC18_HUMAN	Cell surface glycoprotein MUC18 OS=Homo sapiens GN=MCAM PE=1 SV=2	5	1.70608	1.22462	2.03236	0.737904	3.46737	0.972747	0.744732
586	7.24	7.39	21.91	15.73	sp|Q15365|PCBP1_HUMAN	Poly(rC)-binding protein 1 OS=Homo sapiens GN=PCBP1 PE=1 SV=2	5	0.990832	0.954993	0.92045	1.10662	1.05682	1.08643	0.972747
587	7.23	7.42	11.56	7.223	sp|Q9NQW7|XPP1_HUMAN	Xaa-Pro aminopeptidase 1 OS=Homo sapiens GN=XPNPEP1 PE=1 SV=3	5	0.465586	0.549541	0.672977	1.02802	0.461318	0.937562	0.879023
588	7.02	9.13	11.23	3.647	sp|P16615|AT2A2_HUMAN	Sarcoplasmic/endoplasmic reticulum calcium ATPase 2 OS=Homo sapiens GN=ATP2A2 PE=1 SV=1	5	1.0666	0.751623	0.737904	1.24738	1.85353	1.30617	1.07647
589	7.02	9.13	43.56	34.97	sp|P63208|SKP1_HUMAN	S-phase kinase-associated protein 1 OS=Homo sapiens GN=SKP1 PE=1 SV=2	5	2.33346	5.64937	4.7863	2.46604	0.879023	1.61436	0.698232
590	7.01	9.14	28.09	18.52	sp|P25686|DNJB2_HUMAN	DnaJ homolog subfamily B member 2 OS=Homo sapiens GN=DNAJB2 PE=1 SV=3	5	7.94328	8.01678	8.79023	5.01187	8.09096	7.11213	7.11213
591	7.01	7.21	22.7	22.7	sp|Q16270|IBP7_HUMAN	Insulin-like growth factor-binding protein 7 OS=Homo sapiens GN=IGFBP7 PE=1 SV=1	5	3.40408	5.49541	3.66438	1.51356	2.31206	1.34276	1.64437
592	6.92	7.04	45.74	27.91	sp|Q9UKY7|CDV3_HUMAN	Protein CDV3 homolog OS=Homo sapiens GN=CDV3 PE=1 SV=1	5	1.97697	4.16869	3.76704	0.855067	2.24905	0.990832	1.75388
593	6.91	9.25	14.88	5.804	tr|A0A087WX08|A0A087WX08_HUMAN	Gamma-adducin OS=Homo sapiens GN=ADD3 PE=1 SV=1	5	1.33045	1.19124	0.608135	0.195884	2.85759	0.413047	0.855067
594	6.79	7.07	30.94	16.91	tr|H0YC42|H0YC42_HUMAN	Uncharacterized protein OS=Homo sapiens PE=4 SV=2	5	1.92309	3.13329	3.80189	0.92045	0.711214	0.340408	0.496592
595	6.68	8.77	27.97	11.61	sp|P30740|ILEU_HUMAN	Leukocyte elastase inhibitor OS=Homo sapiens GN=SERPINB1 PE=1 SV=1	5	0.862979	0.77983	0.887156	1.31826	0.448745	0.887156	1.09648
596	6.64	6.96	36.89	23.56	sp|Q9UL25|RAB21_HUMAN	Ras-related protein Rab-21 OS=Homo sapiens GN=RAB21 PE=1 SV=3	5	0.928966	0.201372	0.11272	6.36796	0.353183	1.31826	1.7378
597	6.61	6.82	33.33	19.92	sp|P25789|PSA4_HUMAN	Proteasome subunit alpha type-4 OS=Homo sapiens GN=PSMA4 PE=1 SV=1	5	0.570164	1.00925	1	0.794328	0.369828	0.387258	0.772681
598	6.47	6.66	12.58	4.009	sp|Q92973|TNPO1_HUMAN	Transportin-1 OS=Homo sapiens GN=TNPO1 PE=1 SV=2	5	0.20893	0.246604	0.105682	1.38038	0.343558	0.586138	1.21339
599	6.46	8.7	51.16	29.46	sp|O15212|PFD6_HUMAN	Prefoldin subunit 6 OS=Homo sapiens GN=PFDN6 PE=1 SV=1	5	0.613762	1.55597	1.65959	0.301995	1	0.452898	0.60256
600	6.46	8.58	35.56	16	sp|P21266|GSTM3_HUMAN	Glutathione S-transferase Mu 3 OS=Homo sapiens GN=GSTM3 PE=1 SV=3	5	0.118032	0.0870964	0.115878	0.544503	0.125893	0.123595	1.38038
601	6.28	6.37	7.67	2.305	sp|P02751|FINC_HUMAN	Fibronectin OS=Homo sapiens GN=FN1 PE=1 SV=4	5	0.496592	0.554626	0.510505	0.47863	0.972747	0.226986	0.946237
602	6.26	6.34	43.29	30.3	tr|A0A087X130|A0A087X130_HUMAN	Ig kappa chain C region OS=Homo sapiens GN=IGKC PE=1 SV=1	5	0.515229	0.824138	2.51189	1.52757	0.394457	0.912011	0.409261
603	6.18	6.78	20.46	11.24	sp|Q8IW45|NNRD_HUMAN	ATP-dependent (S)-NAD(P)H-hydrate dehydratase OS=Homo sapiens GN=CARKD PE=1 SV=1	5	0.158489	0.457088	0.505825	0.21677	0.172187	0.178649	0.487529
604	6.14	7.46	28.33	10.48	tr|V9HW75|V9HW75_HUMAN	Epididymis secretory protein Li 109 OS=Homo sapiens GN=HEL-S-109 PE=1 SV=1	5	2.96483	4.61318	2.67917	1.64437	1.57036	0.801678	0.666807
605	6.12	7.93	20.61	7.939	sp|P31939|PUR9_HUMAN	Bifunctional purine biosynthesis protein PURH OS=Homo sapiens GN=ATIC PE=1 SV=3	5	0.203236	0.224905	0.369828	0.597035	0.185353	0.448745	0.794328
606	6.04	6.11	14.65	6.28	sp|O95671|ASML_HUMAN	N-acetylserotonin O-methyltransferase-like protein OS=Homo sapiens GN=ASMTL PE=1 SV=3	5	0.409261	0.121339	0.356451	0.879023	0.401791	0.564937	0.794328
607	6.02	7.04	34.09	23.3	tr|X6RLR1|X6RLR1_HUMAN	Dynactin subunit 3 OS=Homo sapiens GN=DCTN3 PE=1 SV=1	5	0.954993	1.03753	1.14815	1.02802	0.963829	1.01859	0.92045
608	5.76	6.73	32.35	23.11	tr|A0A096LPI6|A0A096LPI6_HUMAN	Uncharacterized protein OS=Homo sapiens PE=4 SV=1	5	1.13763	1.25893	1.15878	1.01859	1.23595	1.0666	1.11686
609	5.74	9.17	30.3	15.15	sp|P46777|RL5_HUMAN	60S ribosomal protein L5 OS=Homo sapiens GN=RPL5 PE=1 SV=3	5	3.28095	5.15229	0.772681	2.75423	11.8032	6.48634	0.972747
610	5.67	5.78	35.69	18.82	sp|P38117|ETFB_HUMAN	Electron transfer flavoprotein subunit beta OS=Homo sapiens GN=ETFB PE=1 SV=3	5	0.809096	0.711214	0.648634	0.660693	1.02802	0.608135	0.870964
611	5.65	5.86	51.55	45.36	sp|P60903|S10AA_HUMAN	Protein S100-A10 OS=Homo sapiens GN=S100A10 PE=1 SV=2	5	14.3219	13.5519	15.2757	7.51623	5.44503	3.28095	3.98107
612	5.61	5.75	25.98	10.34	sp|Q15257|PTPA_HUMAN	Serine/threonine-protein phosphatase 2A activator OS=Homo sapiens GN=PPP2R4 PE=1 SV=3	5	0.267917	0.325087	0.356451	0.772681	0.313329	0.559758	1.23595
613	5.56	7.59	14.39	8.393	tr|A0A0C4DG49|A0A0C4DG49_HUMAN	Poliovirus receptor OS=Homo sapiens GN=PVR PE=1 SV=1	5	1.57036	1.0666	0.539511	0.870964	1.1695	0.946237	0.409261
614	5.56	5.79	21.44	11.55	sp|Q9BXK5|B2L13_HUMAN	Bcl-2-like protein 13 OS=Homo sapiens GN=BCL2L13 PE=1 SV=1	5	1.65959	2.24905	1.52757	0.524807	0.887156	0.613762	0.862979
615	5.44	6.37	51.38	33.03	tr|H0YBP9|H0YBP9_HUMAN	Ubiquitin-conjugating enzyme E2 variant 2 (Fragment) OS=Homo sapiens GN=UBE2V2 PE=1 SV=1	5	1.30617	1.65959	2.75423	0.765597	1.39316	1.43219	0.887156
616	5.43	5.49	30.23	24.03	sp|Q9BTM1|H2AJ_HUMAN	Histone H2A.J OS=Homo sapiens GN=H2AFJ PE=1 SV=1	5	3.56451	3.28095	2.35505	1.2942	2.77971	1.18032	0.912011
617	5.39	7.51	16.6	13.21	sp|P55064|AQP5_HUMAN	Aquaporin-5 OS=Homo sapiens GN=AQP5 PE=1 SV=1	5	3.10456	0.0625173	0.100925	3.53183	6.85488	6.54636	4.83059
618	5.3	5.87	45.71	27.14	tr|A6NMQ3|A6NMQ3_HUMAN	Alpha-endosulfine OS=Homo sapiens GN=ENSA PE=1 SV=2	5	0.210863	1.1695	1.36773	0.363078	0.487529	0.420727	0.580764
619	5.19	7.99	27.51	13.27	sp|P67775|PP2AA_HUMAN	Serine/threonine-protein phosphatase 2A catalytic subunit alpha isoform OS=Homo sapiens GN=PPP2CA PE=1 SV=1	5	1.01859	1.35519	1.22462	1.1695	1.20226	1.15878	1.13763
620	5.14	5.21	14.41	7.465	tr|A0A087WUL0|A0A087WUL0_HUMAN	Protein TKFC OS=Homo sapiens GN=TKFC PE=1 SV=1	5	1.04713	0.114815	0.0946237	2.39883	0.954993	1.58489	2.18776
621	4.76	8.14	11.71	2.748	sp|Q9UHN6|TMEM2_HUMAN	Transmembrane protein 2 OS=Homo sapiens GN=TMEM2 PE=1 SV=1	5	1.52757	0.963829	0.972747	1.51356	1.8197	1.55597	1.09648
622	4.6	7.39	19.19	5.433	sp|Q9NSD9|SYFB_HUMAN	Phenylalanine--tRNA ligase beta subunit OS=Homo sapiens GN=FARSB PE=1 SV=3	5	0.248886	0.409261	0.405509	0.549541	0.369828	0.401791	0.685488
623	4.31	6.73	20.53	8.592	sp|Q7L1Q6|BZW1_HUMAN	Basic leucine zipper and W2 domain-containing protein 1 OS=Homo sapiens GN=BZW1 PE=1 SV=1	5	0.990832	1.01859	0.879023	1.1272	1.1695	1.01859	1.24738
624	4.27	4.52	13.06	6.389	sp|O95573|ACSL3_HUMAN	Long-chain-fatty-acid--CoA ligase 3 OS=Homo sapiens GN=ACSL3 PE=1 SV=3	5	1.22462	1.02802	0.83946	1.22462	1.31826	1.38038	1.07647
625	4.26	4.33	20.81	10.4	sp|P55344|LMIP_HUMAN	Lens fiber membrane intrinsic protein OS=Homo sapiens GN=LIM2 PE=1 SV=2	5	0.237684	0.559758	0.366438	0.946237	0.501187	1.30617	1.64437
626	4.23	6.5	32.85	19.81	tr|F8W020|F8W020_HUMAN	Nucleosome assembly protein 1-like 1 (Fragment) OS=Homo sapiens GN=NAP1L1 PE=1 SV=1	5	0.990832	1.0666	1.01859	1.10662	0.981748	0.847227	0.972747
627	4.03	4.04	44.26	44.26	sp|Q9Y5L5|LENEP_HUMAN	Lens epithelial cell protein LEP503 OS=Homo sapiens GN=LENEP PE=2 SV=1	5	2.05116	1.57036	0.457088	0.353183	0.937562	1.0666	0.847227
628	4.02	4.35	15.19	2.139	sp|Q9H7D0|DOCK5_HUMAN	Dedicator of cytokinesis protein 5 OS=Homo sapiens GN=DOCK5 PE=1 SV=3	5	1	1.43219	0.765597	0.981748	1.35519	1.1272	1.15878
629	4.01	4.02	29.5	13.03	tr|E7EQ64|E7EQ64_HUMAN	Trypsin-1 OS=Homo sapiens GN=PRSS1 PE=1 SV=1	5	0.380189	0.554626	0.711214	0.816582	0.564937	0.586138	0.549541
630	4	5.09	21.53	15.79	sp|Q8TEA8|DTD1_HUMAN	D-tyrosyl-tRNA(Tyr) deacylase 1 OS=Homo sapiens GN=DTD1 PE=1 SV=2	5	1.43219	1.05682	2.77971	0.83946	0.0928966	0.195884	0.809096
631	3.78	5.91	16.98	6.289	sp|P11940|PABP1_HUMAN	Polyadenylate-binding protein 1 OS=Homo sapiens GN=PABPC1 PE=1 SV=2	5	1.14815	1.1272	1.35519	1.24738	2.51189	1.31826	0.879023
632	3.54	4.58	26.98	10.23	sp|P00505|AATM_HUMAN	Aspartate aminotransferase, mitochondrial OS=Homo sapiens GN=GOT2 PE=1 SV=3	5	0.963829	1.70608	2.10863	0.301995	1.39316	0.613762	0.265461
633	3.15	3.24	17.27	8.835	tr|A2A2V1|A2A2V1_HUMAN	Major prion protein (Fragment) OS=Homo sapiens GN=PRNP PE=1 SV=1	5	5.7544	5.91562	2.65461	2.67917	4.83059	6.42688	3.40408
634	2.87	5.01	23.58	6.803	sp|Q7Z6B0|CCD91_HUMAN	Coiled-coil domain-containing protein 91 OS=Homo sapiens GN=CCDC91 PE=1 SV=2	5	0.711214	0.862979	1.19124	0.862979	0.724436	0.731139	0.954993
635	2.59	3.07	11.67	3.235	sp|P23378|GCSP_HUMAN	Glycine dehydrogenase (decarboxylating), mitochondrial OS=Homo sapiens GN=GLDC PE=1 SV=2	5	1.20226	1.20226	0.972747	1.09648	1.27057	1.05682	1.27057
636	2.36	6.54	19.1	8.577	tr|C9J381|C9J381_HUMAN	Inosine-5'-monophosphate dehydrogenase OS=Homo sapiens GN=IMPDH1 PE=1 SV=1	5	0.444631	0.319154	0.192309	0.239883	0.251189	0.409261	0.474242
637	2.26	7.85	18.46	10.74	sp|P54725|RD23A_HUMAN	UV excision repair protein RAD23 homolog A OS=Homo sapiens GN=RAD23A PE=1 SV=1	5	1.44544	1.6293	1.95884	1.47231	1.80302	1.90546	1.02802
638	2	6.11	24.27	12.62	sp|P11234|RALB_HUMAN	Ras-related protein Ral-B OS=Homo sapiens GN=RALB PE=1 SV=1	5	1.38038	1.27057	2.05116	1.00925	1.7378	1.90546	1.30617
639	2	5.37	26.48	15.26	tr|F8VZX2|F8VZX2_HUMAN	Poly(rC)-binding protein 2 OS=Homo sapiens GN=PCBP2 PE=1 SV=1	5	1.28233	1.15878	1.01859	1.51356	2.80543	1.97697	1.07647
640	2	4.19	11.39	1.985	sp|O75400|PR40A_HUMAN	Pre-mRNA-processing factor 40 homolog A OS=Homo sapiens GN=PRPF40A PE=1 SV=2	5
641	2	2.55	16.43	4.225	sp|Q9Y5K6|CD2AP_HUMAN	CD2-associated protein OS=Homo sapiens GN=CD2AP PE=1 SV=1	5	1.99526	1.52757	4.40555	1.43219	1.48594	1.52757	1.58489
642	1.43	1.69	8.499	1.311	sp|Q9H2D6|TARA_HUMAN	TRIO and F-actin-binding protein OS=Homo sapiens GN=TRIOBP PE=1 SV=3	5	0.591562	0.809096	0.751623	0.691831	0.787046	0.737904	0.831764
643	8.89	8.76	41.67	31.86	sp|P84157|MXRA7_HUMAN	Matrix-remodeling-associated protein 7 OS=Homo sapiens GN=MXRA7 PE=1 SV=1	4	1.57036	3.63078	1.70608	0.92045	0.440555	0.619441	1.25893
644	8.82	8.87	26.03	5.641	sp|Q93034|CUL5_HUMAN	Cullin-5 OS=Homo sapiens GN=CUL5 PE=1 SV=4	4	0.432514	0.57544	0.194089	1.30617	0.444631	0.937562	1.11686
645	8.63	8.73	17.37	4.025	sp|Q14697|GANAB_HUMAN	Neutral alpha-glucosidase AB OS=Homo sapiens GN=GANAB PE=1 SV=3	4	0.972747	0.895365	0.510505	0.946237	1.78649	0.529663	1.18032
646	8.59	8.61	36.16	23.16	tr|J3QRS3|J3QRS3_HUMAN	Myosin regulatory light chain 12A OS=Homo sapiens GN=MYL12A PE=1 SV=1	4	2.35505	2.31206	2.10863	1.51356	1.69044	1.70608	1.24738
647	8.53	8.55	27.52	12.75	sp|P57087|JAM2_HUMAN	Junctional adhesion molecule B OS=Homo sapiens GN=JAM2 PE=1 SV=1	4	2.22844	2.88403	1.75388	1.36773	1.13763	1.34276	1.18032
648	8.45	8.54	19.45	5.055	sp|Q7KZF4|SND1_HUMAN	Staphylococcal nuclease domain-containing protein 1 OS=Homo sapiens GN=SND1 PE=1 SV=1	4	0.895365	1.78649	1.19124	1.0666	2.93765	1.36773	2.26986
649	8.27	8.29	48.59	22.54	sp|P60983|GMFB_HUMAN	Glia maturation factor beta OS=Homo sapiens GN=GMFB PE=1 SV=2	4	0.369828	0.586138	0.37325	2.55859	0.717794	1.21339	0.895365
650	8.11	8.6	24.91	11.6	sp|P15880|RS2_HUMAN	40S ribosomal protein S2 OS=Homo sapiens GN=RPS2 PE=1 SV=2	4	0.895365	1.44544	0.436516	2.35505	4.32514	2.58226	0.954993
651	8.1	8.11	28.89	12.7	sp|P05198|IF2A_HUMAN	Eukaryotic translation initiation factor 2 subunit 1 OS=Homo sapiens GN=EIF2S1 PE=1 SV=3	4	0.380189	0.164437	0.226986	0.737904	0.794328	0.691831	0.444631
652	8.05	8.35	22.54	14.79	sp|Q96NU7|HUTI_HUMAN	Probable imidazolonepropionase OS=Homo sapiens GN=AMDHD1 PE=1 SV=2	4	0.105682	0.164437	0.178649	0.322107	0.083946	0.224905	0.928966
653	8.04	8.43	63.09	24.83	sp|P16949|STMN1_HUMAN	Stathmin OS=Homo sapiens GN=STMN1 PE=1 SV=3	4	0.613762	8.79023	6.13762	1.45881	1.58489	2.22844	2.29087
654	8.02	8.05	20.62	8.634	sp|Q16799|RTN1_HUMAN	Reticulon-1 OS=Homo sapiens GN=RTN1 PE=1 SV=1	4	4.9204	5.97035	3.66438	2.31206	6.25173	2.07014	1.45881
655	8.01	8.04	19.92	9.962	sp|Q13596|SNX1_HUMAN	Sorting nexin-1 OS=Homo sapiens GN=SNX1 PE=1 SV=3	4	1.01859	0.903649	0.83946	0.963829	1.13763	0.937562	0.954993
656	8.01	8.01	23.15	11.46	sp|P14324|FPPS_HUMAN	Farnesyl pyrophosphate synthase OS=Homo sapiens GN=FDPS PE=1 SV=4	4	0.231206	0.244343	0.212814	0.698232	0.239883	0.387258	0.642688
657	8	8.08	15.99	6.691	sp|P10155|RO60_HUMAN	60 kDa SS-A/Ro ribonucleoprotein OS=Homo sapiens GN=TROVE2 PE=1 SV=2	4	0.57544	0.510505	0.586138	1.94089	0.831764	1.07647	1.0666
658	8	8.01	34.16	23.76	tr|A0A087WUQ6|A0A087WUQ6_HUMAN	Glutathione peroxidase OS=Homo sapiens GN=GPX1 PE=1 SV=1	4	0.277971	0.214783	0.322107	0.613762	0.183654	0.280543	0.613762
659	8	8.01	22.3	16.55	sp|Q96EF6|FBX17_HUMAN	F-box only protein 17 OS=Homo sapiens GN=FBXO17 PE=1 SV=1	4	0.267917	0.253513	0.37325	0.717794	0.120226	0.42462	1.0666
660	7.79	7.85	21.47	9.706	sp|P25685|DNJB1_HUMAN	DnaJ homolog subfamily B member 1 OS=Homo sapiens GN=DNAJB1 PE=1 SV=4	4	2.58226	1.43219	0.20893	2.05116	4.16869	2.99226	3.10456
661	7.72	7.77	43.69	35.92	sp|O75964|ATP5L_HUMAN	ATP synthase subunit g, mitochondrial OS=Homo sapiens GN=ATP5L PE=1 SV=3	4	0.619441	0.937562	0.981748	0.608135	0.912011	0.37325	0.92045
662	7.51	7.7	15.2	3.801	sp|Q06481|APLP2_HUMAN	Amyloid-like protein 2 OS=Homo sapiens GN=APLP2 PE=1 SV=2	4	2.14783	2.51189	2.18776	0.912011	1.09648	0.505825	0.597035
663	7.45	7.67	24.72	9.444	sp|Q15435|PP1R7_HUMAN	Protein phosphatase 1 regulatory subunit 7 OS=Homo sapiens GN=PPP1R7 PE=1 SV=1	4	0.698232	0.737904	0.737904	1.24738	0.847227	1.25893	1.21339
664	7.44	7.52	40	28.8	sp|O14737|PDCD5_HUMAN	Programmed cell death protein 5 OS=Homo sapiens GN=PDCD5 PE=1 SV=3	4	1.78649	3.83707	4.61318	0.613762	1.64437	0.711214	0.928966
665	7.41	7.65	23.54	7.292	sp|Q92743|HTRA1_HUMAN	Serine protease HTRA1 OS=Homo sapiens GN=HTRA1 PE=1 SV=1	4	2.99226	2.80543	3.01995	0.272898	2.55859	0.636796	1.58489
666	7.39	7.53	19.04	8.629	sp|Q9UQ80|PA2G4_HUMAN	Proliferation-associated protein 2G4 OS=Homo sapiens GN=PA2G4 PE=1 SV=3	4	1.08643	1.20226	1.25893	1.15878	1.1272	1.1272	1.34276
667	7.32	7.47	19.97	6.339	tr|J3KPF3|J3KPF3_HUMAN	4F2 cell-surface antigen heavy chain OS=Homo sapiens GN=SLC3A2 PE=1 SV=1	4	1.2942	0.963829	0.501187	0.801678	0.887156	0.92045	1.05682
668	7.3	7.37	16.98	7.985	sp|Q8N3E9|PLCD3_HUMAN	1-phosphatidylinositol 4,5-bisphosphate phosphodiesterase delta-3 OS=Homo sapiens GN=PLCD3 PE=1 SV=3	4	1.78649	1.43219	0.108643	1.33045	2.44343	2.14783	1.90546
669	7.28	7.61	23.75	7.838	sp|P09543|CN37_HUMAN	2',3'-cyclic-nucleotide 3'-phosphodiesterase OS=Homo sapiens GN=CNP PE=1 SV=2	4	1.21339	0.92045	0.711214	1.03753	1.40605	1.45881	1.22462
670	7.17	7.3	13.35	8.167	tr|F6TLX2|F6TLX2_HUMAN	Glyoxalase domain-containing protein 4 OS=Homo sapiens GN=GLOD4 PE=1 SV=1	4	0.549541	0.554626	0.685488	1.11686	1.13763	1.47231	1.28233
671	7.14	7.56	23.98	7.157	tr|E7EUC7|E7EUC7_HUMAN	UTP--glucose-1-phosphate uridylyltransferase OS=Homo sapiens GN=UGP2 PE=1 SV=1	4	0.120226	0.42462	0.0972747	1.13763	0.164437	0.831764	1.55597
672	7.1	7.57	28.41	13.64	sp|P61247|RS3A_HUMAN	40S ribosomal protein S3a OS=Homo sapiens GN=RPS3A PE=1 SV=2	4	2.85759	3.87258	0.586138	4.96592	7.11213	3.7325	2.26986
673	7.1	7.16	24.93	13.26	sp|Q9GZT8|NIF3L_HUMAN	NIF3-like protein 1 OS=Homo sapiens GN=NIF3L1 PE=1 SV=2	4	0.1	0.301995	0.440555	0.529663	0.0862979	0.356451	0.608135
674	7.1	7.15	49.17	24.86	tr|F8WCF6|F8WCF6_HUMAN	Protein ARPC4-TTLL3 OS=Homo sapiens GN=ARPC4-TTLL3 PE=1 SV=1	4	2.1677	2.29087	0.474242	7.04693	1.8197	5.44503	3.69828
675	7.08	7.12	21.45	12.3	sp|Q8NHW5|RLA0L_HUMAN	60S acidic ribosomal protein P0-like OS=Homo sapiens GN=RPLP0P6 PE=5 SV=1	4	1.14815	0.855067	0.0285759	1.83654	2.14783	1.52757	0.816582
676	7.01	7.19	41.11	31.67	sp|Q9NZJ9|NUDT4_HUMAN	Diphosphoinositol polyphosphate phosphohydrolase 2 OS=Homo sapiens GN=NUDT4 PE=1 SV=2	4	0.903649	1.20226	0.809096	1.05682	1.20226	0.981748	1.18032
677	6.96	7.14	17.45	4.05	sp|P33176|KINH_HUMAN	Kinesin-1 heavy chain OS=Homo sapiens GN=KIF5B PE=1 SV=1	4	0.787046	0.912011	1.02802	1	0.801678	1.00925	1.09648
678	6.95	7	24.84	12.9	sp|O00487|PSDE_HUMAN	26S proteasome non-ATPase regulatory subunit 14 OS=Homo sapiens GN=PSMD14 PE=1 SV=1	4	0.586138	0.510505	0.625173	1.03753	0.698232	0.625173	1.01859
679	6.91	6.99	38	28	tr|J3KNF8|J3KNF8_HUMAN	Cytochrome b5 type B OS=Homo sapiens GN=CYB5B PE=1 SV=1	4	7.17794	10.4713	3.83707	3.59749	5.80764	3.16228	3.16228
680	6.87	6.96	15.73	3.13	sp|Q96F07|CYFP2_HUMAN	Cytoplasmic FMR1-interacting protein 2 OS=Homo sapiens GN=CYFIP2 PE=1 SV=2	4	0.457088	0.398107	0.111686	0.801678	1.38038	0.698232	1.19124
681	6.84	6.87	27.78	18.06	sp|P09601|HMOX1_HUMAN	Heme oxygenase 1 OS=Homo sapiens GN=HMOX1 PE=1 SV=1	4	3.98107	11.5878	8.16582	3.28095	4.7863	4.87528	3.98107
682	6.83	6.99	44.97	22.49	sp|P13073|COX41_HUMAN	Cytochrome c oxidase subunit 4 isoform 1, mitochondrial OS=Homo sapiens GN=COX4I1 PE=1 SV=1	4	1.70608	2.29087	1.52757	1.97697	2.1677	1.23595	1.14815
683	6.81	6.85	24.3	16.36	sp|Q92882|OSTF1_HUMAN	Osteoclast-stimulating factor 1 OS=Homo sapiens GN=OSTF1 PE=1 SV=2	4	2.208	3.10456	2.75423	2.42103	2.58226	1.95884	1.88799
684	6.79	6.93	26.51	13.09	sp|P12236|ADT3_HUMAN	ADP/ATP translocase 3 OS=Homo sapiens GN=SLC25A6 PE=1 SV=4	4	1.90546	1.95884	1.30617	1.57036	1.92309	1.77011	1.67494
685	6.72	6.76	30.04	17.11	tr|F8W031|F8W031_HUMAN	Uncharacterized protein (Fragment) OS=Homo sapiens PE=1 SV=1	4	1.33045	2.33346	1.70608	0.544503	1.07647	0.737904	0.724436
686	6.7	7.09	34.65	16.17	sp|P05026|AT1B1_HUMAN	Sodium/potassium-transporting ATPase subunit beta-1 OS=Homo sapiens GN=ATP1B1 PE=1 SV=1	4	2.29087	1.43219	0.758578	3.37287	0.758578	1.1695	2.07014
687	6.61	6.66	15.45	8.119	sp|Q9UHG3|PCYOX_HUMAN	Prenylcysteine oxidase 1 OS=Homo sapiens GN=PCYOX1 PE=1 SV=3	4	10.3753	5.49541	4.13048	5.7544	9.63829	5.80764	4.69894
688	6.58	6.62	41.27	19.58	sp|P01112|RASH_HUMAN	GTPase HRas OS=Homo sapiens GN=HRAS PE=1 SV=1	4	1.27057	0.928966	0.691831	1.04713	1.1272	1.38038	1.04713
689	6.56	8.6	25.65	12.66	sp|Q16775|GLO2_HUMAN	Hydroxyacylglutathione hydrolase, mitochondrial OS=Homo sapiens GN=HAGH PE=1 SV=2	4	0.188799	0.401791	0.744732	0.267917	0.108643	0.591562	0.436516
690	6.45	6.71	30.34	14.61	sp|Q03135|CAV1_HUMAN	Caveolin-1 OS=Homo sapiens GN=CAV1 PE=1 SV=4	4	1.94089	5.29663	1.11686	4.16869	1.2942	10.4713	8.87156
691	6.36	6.44	18.44	7.778	sp|Q9Y6N5|SQRD_HUMAN	Sulfide:quinone oxidoreductase, mitochondrial OS=Homo sapiens GN=SQRDL PE=1 SV=1	4	0.717794	0.801678	0.515229	1.00925	0.809096	0.685488	0.704693
692	6.34	6.41	25.07	14.88	sp|Q9NX46|ARHL2_HUMAN	Poly(ADP-ribose) glycohydrolase ARH3 OS=Homo sapiens GN=ADPRHL2 PE=1 SV=1	4	0.679204	0.831764	0.879023	1.09648	0.870964	1.1272	1.00925
693	6.28	6.35	26.06	17.58	tr|A0A087WZH7|A0A087WZH7_HUMAN	Myristoylated alanine-rich C-kinase substrate OS=Homo sapiens GN=MARCKS PE=1 SV=1	4	6.72977	9.37562	5.19996	1.69044	4.57088	1.48594	0.862979
694	6.27	6.44	79.55	50	sp|P63313|TYB10_HUMAN	Thymosin beta-10 OS=Homo sapiens GN=TMSB10 PE=1 SV=2	4	1.24738	3.37287	3.53183	0.972747	1.55597	1.25893	0.937562
695	6.24	6.35	10.55	3.636	sp|Q00839|HNRPU_HUMAN	Heterogeneous nuclear ribonucleoprotein U OS=Homo sapiens GN=HNRNPU PE=1 SV=6	4	42.8549	18.5353	2.0893	20.5116	46.5586	34.9945	35.9749
696	6.24	6.27	18.21	12.61	sp|O00303|EIF3F_HUMAN	Eukaryotic translation initiation factor 3 subunit F OS=Homo sapiens GN=EIF3F PE=1 SV=1	4	1.75388	1.51356	0.83946	2.1677	2.18776	1.77011	1.70608
697	6.21	6.23	42.25	30.48	tr|C9JBI3|C9JBI3_HUMAN	Phosphoserine phosphatase (Fragment) OS=Homo sapiens GN=PSPH PE=1 SV=1	4	1.09648	0.879023	1	1.88799	1.69044	1.75388	1.55597
698	6.18	8.24	32.63	19.3	sp|O95865|DDAH2_HUMAN	N(G),N(G)-dimethylarginine dimethylaminohydrolase 2 OS=Homo sapiens GN=DDAH2 PE=1 SV=1	4	2.208	3.43558	2.99226	2.26986	3.25087	5.24807	2.88403
699	6.18	7.15	24.83	14.14	sp|Q99598|TSNAX_HUMAN	Translin-associated protein X OS=Homo sapiens GN=TSNAX PE=1 SV=1	4	1	1.14815	1.19124	1.20226	1.03753	1.14815	1.31826
700	6.17	6.25	18.06	7.853	sp|P21283|VATC1_HUMAN	V-type proton ATPase subunit C 1 OS=Homo sapiens GN=ATP6V1C1 PE=1 SV=4	4	2.14783	1.55597	1.02802	2.1677	2.51189	2.0893	2.14783
701	6.11	6.23	35.82	15.92	sp|P02763|A1AG1_HUMAN	Alpha-1-acid glycoprotein 1 OS=Homo sapiens GN=ORM1 PE=1 SV=1	4	0.0737904	0.337287	0.346737	1.8197	0.0580764	1.40605	0.366438
702	6.1	6.26	20.69	9.885	sp|Q6DKJ4|NXN_HUMAN	Nucleoredoxin OS=Homo sapiens GN=NXN PE=1 SV=2	4	1.2942	0.231206	0.758578	2.208	0.765597	1.33045	1.44544
703	6.08	6.11	14.89	4.812	sp|Q96B97|SH3K1_HUMAN	SH3 domain-containing kinase-binding protein 1 OS=Homo sapiens GN=SH3KBP1 PE=1 SV=2	4	1.49968	1.34276	1.40605	1.2942	1.36773	1.03753	1.22462
704	6.05	8.26	29.28	13.51	tr|A0A0C4DFU2|A0A0C4DFU2_HUMAN	Superoxide dismutase OS=Homo sapiens GN=SOD2 PE=1 SV=1	4	2.24905	2.51189	4.48745	0.831764	0.534564	0.380189	1.11686
705	6.04	6.38	22.73	8.824	sp|P11766|ADHX_HUMAN	Alcohol dehydrogenase class-3 OS=Homo sapiens GN=ADH5 PE=1 SV=4	4	0.0816582	0.226986	0.253513	0.847227	0.190546	0.559758	1.07647
706	6.01	6.09	24.86	12.57	sp|O75695|XRP2_HUMAN	Protein XRP2 OS=Homo sapiens GN=RP2 PE=1 SV=4	4	8.87156	2.96483	1.03753	3.63078	5.80764	8.47227	5.44503
707	6.01	5.74	34.24	11.96	sp|Q04760|LGUL_HUMAN	Lactoylglutathione lyase OS=Homo sapiens GN=GLO1 PE=1 SV=4	4	1.09648	1.90546	3.22107	0.972747	1.57036	1.51356	0.903649
708	6	8.02	8.815	2.818	tr|B1ALU1|B1ALU1_HUMAN	Protein ADGRL2 OS=Homo sapiens GN=ADGRL2 PE=1 SV=1	4	5.24807	3.69828	2.99226	4.7863	7.58578	8.01678	4.13048
709	6	6.32	38.1	29.52	sp|P10599|THIO_HUMAN	Thioredoxin OS=Homo sapiens GN=TXN PE=1 SV=3	4	0.340408	0.369828	0.47863	0.229087	0.15417	0.222844	0.248886
710	6	6.2	19.73	12.56	sp|P27144|KAD4_HUMAN	Adenylate kinase 4, mitochondrial OS=Homo sapiens GN=AK4 PE=1 SV=1	4	1	1.13763	1.00925	0.990832	1.04713	0.787046	1.04713
711	6	6	16.1	15.12	sp|P49720|PSB3_HUMAN	Proteasome subunit beta type-3 OS=Homo sapiens GN=PSMB3 PE=1 SV=2	4	0.534564	2.60615	2.83139	1.52757	0.549541	0.420727	0.928966
712	5.94	6.07	14.12	7.35	sp|Q15223|PVRL1_HUMAN	Nectin-1 OS=Homo sapiens GN=PVRL1 PE=1 SV=3	4	1.59956	1.5417	1.0666	0.580764	0.809096	1.83654	0.765597
713	5.82	8.29	18.52	6.79	tr|E9PEX6|E9PEX6_HUMAN	Dihydrolipoyl dehydrogenase OS=Homo sapiens GN=DLD PE=1 SV=1	4	1.08643	1.15878	0.847227	0.77983	0.642688	0.270396	0.642688
714	5.68	5.97	24.12	8.943	sp|O60256|KPRB_HUMAN	Phosphoribosyl pyrophosphate synthase-associated protein 2 OS=Homo sapiens GN=PRPSAP2 PE=1 SV=1	4	0.519996	0.47863	0.559758	0.972747	0.660693	1.02802	1.21339
715	5.57	5.7	23.2	8.817	sp|P55010|IF5_HUMAN	Eukaryotic translation initiation factor 5 OS=Homo sapiens GN=EIF5 PE=1 SV=2	4	9.28966	1.2942	3.25087	6.08135	13.0617	6.72977	5.49541
716	5.55	7.77	21.08	5.547	sp|P04844|RPN2_HUMAN	Dolichyl-diphosphooligosaccharide--protein glycosyltransferase subunit 2 OS=Homo sapiens GN=RPN2 PE=1 SV=3	4	1.55597	1.49968	0.772681	1.39316	3.56451	1.10662	2.03236
717	5.51	5.57	26.02	11.73	sp|Q9UJY1|HSPB8_HUMAN	Heat shock protein beta-8 OS=Homo sapiens GN=HSPB8 PE=1 SV=1	4	2.80543	2.18776	2.72898	0.758578	4.28549	4.44631	2.85759
718	5.49	5.61	30	23.57	sp|P62829|RL23_HUMAN	60S ribosomal protein L23 OS=Homo sapiens GN=RPL23 PE=1 SV=1	4	0.946237	1.13763	1.1272	0.794328	1.23595	1.04713	1.1272
719	5.48	5.57	15.95	6.748	sp|P15260|INGR1_HUMAN	Interferon gamma receptor 1 OS=Homo sapiens GN=IFNGR1 PE=1 SV=1	4	3.56451	2.35505	1.69044	0.903649	4.57088	2.44343	1.69044
720	5.47	7.59	25.13	18.97	sp|O00264|PGRC1_HUMAN	Membrane-associated progesterone receptor component 1 OS=Homo sapiens GN=PGRMC1 PE=1 SV=3	4	3.66438	3.69828	2.03236	1.57036	2.67917	0.787046	1.43219
721	5.46	5.69	20.36	10.94	sp|Q15417|CNN3_HUMAN	Calponin-3 OS=Homo sapiens GN=CNN3 PE=1 SV=1	4	1.8197	2.18776	2.0893	1.95884	3.0761	3.94457	1.44544
722	5.44	6.13	18.18	4.177	sp|P55884|EIF3B_HUMAN	Eukaryotic translation initiation factor 3 subunit B OS=Homo sapiens GN=EIF3B PE=1 SV=3	4	0.346737	0.175388	0.457088	1.43219	0.731139	0.613762	1.01859
723	5.33	5.42	19.8	9.291	tr|H0Y512|H0Y512_HUMAN	Adipocyte plasma membrane-associated protein (Fragment) OS=Homo sapiens GN=APMAP PE=1 SV=1	4	3.46737	2.46604	2.63027	1.48594	2.39883	1.48594	1.72187
724	5.26	5.44	50	17.16	sp|Q9NQP4|PFD4_HUMAN	Prefoldin subunit 4 OS=Homo sapiens GN=PFDN4 PE=1 SV=1	4	2.35505	15.8489	14.9968	7.65597	7.44732	7.31139	4.36516
725	5.26	5.36	24.05	10.44	sp|P0C870|JMJD7_HUMAN	JmjC domain-containing protein 7 OS=Homo sapiens GN=JMJD7 PE=1 SV=1	4	0.272898	0.37325	0.394457	0.698232	0.224905	0.322107	0.887156
726	5.24	7.86	23.04	13.36	sp|P62906|RL10A_HUMAN	60S ribosomal protein L10a OS=Homo sapiens GN=RPL10A PE=1 SV=2	4	2.96483	1.10662	0.161436	2.0893	6.60693	2.65461	0.586138
727	5.18	6.13	16.89	5.882	tr|C9JIZ6|C9JIZ6_HUMAN	Prosaposin OS=Homo sapiens GN=PSAP PE=1 SV=2	4	3.28095	8.31764	3.90841	1.95884	3.0761	1.88799	1.90546
728	5.17	5.25	18.26	7.485	sp|Q92905|CSN5_HUMAN	COP9 signalosome complex subunit 5 OS=Homo sapiens GN=COPS5 PE=1 SV=4	4	0.717794	0.654636	0.816582	1.27057	0.580764	0.809096	1.15878
729	5.14	6.81	36.32	21.52	tr|E9PGT1|E9PGT1_HUMAN	Translin OS=Homo sapiens GN=TSN PE=1 SV=1	4	0.444631	0.42462	0.496592	0.679204	0.346737	0.704693	0.765597
730	5.1	5.46	43.7	22.22	sp|Q8N5K1|CISD2_HUMAN	CDGSH iron-sulfur domain-containing protein 2 OS=Homo sapiens GN=CISD2 PE=1 SV=1	4	5.24807	6.48634	4.01791	1.94089	3.69828	1.04713	1.21339
731	5.08	5.2	14.16	6.104	sp|P05067|A4_HUMAN	Amyloid beta A4 protein OS=Homo sapiens GN=APP PE=1 SV=3	4	1.01859	1.43219	0.981748	0.469894	0.539511	0.608135	0.809096
732	5.06	6.7	13.84	5.272	sp|P52306|GDS1_HUMAN	Rap1 GTPase-GDP dissociation stimulator 1 OS=Homo sapiens GN=RAP1GDS1 PE=1 SV=3	4	8.31764	6.36796	6.54636	15.1356	8.09096	12.2462	9.72747
733	4.98	5.88	41.06	25.17	sp|O15511|ARPC5_HUMAN	Actin-related protein 2/3 complex subunit 5 OS=Homo sapiens GN=ARPC5 PE=1 SV=3	4	4.2462	5.24807	3.87258	4.01791	1.49968	4.28549	5.54626
734	4.97	6.26	30.08	9.769	sp|Q15008|PSMD6_HUMAN	26S proteasome non-ATPase regulatory subunit 6 OS=Homo sapiens GN=PSMD6 PE=1 SV=1	4	1.18032	0.440555	0.487529	0.937562	0.895365	1.01859	0.824138
735	4.89	5.66	49.67	21.57	sp|Q9BPX5|ARP5L_HUMAN	Actin-related protein 2/3 complex subunit 5-like protein OS=Homo sapiens GN=ARPC5L PE=1 SV=1	4	2.18776	2.77971	3.16228	1.22462	1.15878	1.04713	0.887156
736	4.87	5.04	34.45	21.43	tr|B7Z6Z4|B7Z6Z4_HUMAN	Myosin light polypeptide 6 OS=Homo sapiens GN=MYL6 PE=1 SV=1	4	5.80764	6.60693	2.39883	2.99226	4.96592	4.01791	4.01791
737	4.81	6.95	46.06	26.67	sp|P60981|DEST_HUMAN	Destrin OS=Homo sapiens GN=DSTN PE=1 SV=3	4	0.794328	1.97697	0.275423	2.44343	2.99226	3.76704	2.83139
738	4.69	4.85	16.15	12.69	tr|F8WF69|F8WF69_HUMAN	Clathrin light chain A OS=Homo sapiens GN=CLTA PE=1 SV=1	4	4.32514	5.29663	7.31139	1.92309	2.75423	2.22844	1.57036
739	4.64	4.82	50.39	31.78	sp|O95168|NDUB4_HUMAN	NADH dehydrogenase [ubiquinone] 1 beta subcomplex subunit 4 OS=Homo sapiens GN=NDUFB4 PE=1 SV=3	4	1.7378	0.758578	1.45881	1.21339	1.15878	0.60256	0.212814
740	4.6	5.54	22.88	13.65	tr|A0A0A0MSW4|A0A0A0MSW4_HUMAN	Phosphatidylinositol transfer protein beta isoform OS=Homo sapiens GN=PITPNB PE=1 SV=1	4	0.751623	0.751623	1.61436	1.25893	0.597035	0.642688	0.711214
741	4.42	8.53	18.93	8.833	sp|Q14257|RCN2_HUMAN	Reticulocalbin-2 OS=Homo sapiens GN=RCN2 PE=1 SV=1	4	1.21339	1.49968	1.36773	0.831764	1.11686	0.954993	1.05682
742	4.4	4.5	21.35	12.92	sp|Q9UJZ1|STML2_HUMAN	Stomatin-like protein 2, mitochondrial OS=Homo sapiens GN=STOML2 PE=1 SV=1	4	5.91562	5.01187	3.28095	0.937562	9.81748	2.51189	5.19996
743	4.38	5.3	10.21	2.703	sp|Q8N0X7|SPG20_HUMAN	Spartin OS=Homo sapiens GN=SPG20 PE=1 SV=1	4	1.04713	0.946237	0.990832	1.19124	0.912011	0.912011	1.1695
744	4.37	4.98	17.41	6.101	sp|P17252|KPCA_HUMAN	Protein kinase C alpha type OS=Homo sapiens GN=PRKCA PE=1 SV=4	4	1.64437	0.625173	0.387258	4.36516	4.05509	1.58489	1.28233
745	4.33	4.97	28	12.5	sp|P61086|UBE2K_HUMAN	Ubiquitin-conjugating enzyme E2 K OS=Homo sapiens GN=UBE2K PE=1 SV=3	4	0.831764	0.794328	0.862979	1.08643	1.15878	1.18032	0.831764
746	4.3	6.48	35.63	27.59	tr|A8MX94|A8MX94_HUMAN	Glutathione S-transferase P OS=Homo sapiens GN=GSTP1 PE=1 SV=1	4	0.363078	0.420727	0.37325	0.724436	0.296483	0.698232	0.963829
747	4.19	5.17	24.55	13.94	sp|P13716|HEM2_HUMAN	Delta-aminolevulinic acid dehydratase OS=Homo sapiens GN=ALAD PE=1 SV=1	4	1.11686	0.83946	0.809096	0.816582	0.222844	0.501187	0.895365
748	4.14	4.26	27.27	13.8	sp|Q12846|STX4_HUMAN	Syntaxin-4 OS=Homo sapiens GN=STX4 PE=1 SV=2	4	1.44544	1.69044	1.78649	0.928966	1.2942	0.83946	0.972747
749	4.11	6.31	17.25	4.902	sp|P49257|LMAN1_HUMAN	Protein ERGIC-53 OS=Homo sapiens GN=LMAN1 PE=1 SV=2	4	1.52757	1.52757	0.794328	0.772681	2.03236	1.23595	1.51356
750	4.09	6.19	17.42	6.452	tr|J3KQU4|J3KQU4_HUMAN	TOM1-like protein 1 OS=Homo sapiens GN=TOM1L1 PE=1 SV=1	4	0.855067	0.824138	0.92045	0.870964	0.711214	0.83946	0.801678
751	4.02	6.73	22.3	11.49	sp|P53004|BIEA_HUMAN	Biliverdin reductase A OS=Homo sapiens GN=BLVRA PE=1 SV=2	4	0.218776	0.263027	0.246604	1.92309	0.461318	0.758578	0.862979
752	4.02	4.1	12.98	4.781	sp|P48449|ERG7_HUMAN	Lanosterol synthase OS=Homo sapiens GN=LSS PE=1 SV=1	4	0.660693	0.698232	0.515229	0.731139	0.691831	0.704693	0.895365
753	4.02	4.07	20.29	8.857	sp|Q12792|TWF1_HUMAN	Twinfilin-1 OS=Homo sapiens GN=TWF1 PE=1 SV=3	4	0.801678	0.758578	0.539511	1.10662	1.02802	1.02802	0.963829
754	4.01	5.14	23.76	14.18	sp|Q07021|C1QBP_HUMAN	Complement component 1 Q subcomponent-binding protein, mitochondrial OS=Homo sapiens GN=C1QBP PE=1 SV=1	4	1.72187	3.10456	2.03236	1.1272	2.05116	1.22462	1.94089
755	4.01	4.01	49.57	49.57	sp|P05387|RLA2_HUMAN	60S acidic ribosomal protein P2 OS=Homo sapiens GN=RPLP2 PE=1 SV=1	4	2.0893	4.96592	1.75388	0.440555	1.07647	1.08643	1.1272
756	4	6.21	13.14	3.787	sp|Q8NE71|ABCF1_HUMAN	ATP-binding cassette sub-family F member 1 OS=Homo sapiens GN=ABCF1 PE=1 SV=2	4	1.36773	1.39316	1.83654	1.23595	1.39316	1.61436	1.43219
757	4	4.16	14.82	6.824	sp|Q09028|RBBP4_HUMAN	Histone-binding protein RBBP4 OS=Homo sapiens GN=RBBP4 PE=1 SV=3	4	0.92045	1.07647	1.22462	0.928966	1.22462	1.1272	0.711214
758	4	4.02	17.24	7.958	sp|Q8TCT9|HM13_HUMAN	Minor histocompatibility antigen H13 OS=Homo sapiens GN=HM13 PE=1 SV=1	4	1.67494	1.41906	1.13763	1.64437	4.13048	1.21339	2.35505
759	4	4	70.59	61.76	sp|P50151|GBG10_HUMAN	Guanine nucleotide-binding protein G(I)/G(S)/G(O) subunit gamma-10 OS=Homo sapiens GN=GNG10 PE=1 SV=1	4	0.847227	1.09648	0.698232	0.831764	0.758578	0.794328	0.691831
760	3.92	6.1	21.01	7.505	tr|F2Z2V0|F2Z2V0_HUMAN	Copine-1 (Fragment) OS=Homo sapiens GN=CPNE1 PE=1 SV=1	4	1.97697	0.744732	0.946237	3.7325	2.99226	1.36773	1.65959
761	3.92	4.66	21.16	12.17	sp|Q00765|REEP5_HUMAN	Receptor expression-enhancing protein 5 OS=Homo sapiens GN=REEP5 PE=1 SV=3	4	10	11.8032	7.44732	4.7863	5.49541	4.52898	2.96483
762	3.89	6.13	18.75	6.452	tr|H7C3P4|H7C3P4_HUMAN	Glucosamine (N-acetyl)-6-sulfatase (Sanfilippo disease IIID), isoform CRA_b OS=Homo sapiens GN=GNS PE=1 SV=1	4	1.58489	1.75388	1.51356	1.22462	1.0666	1.13763	1.04713
763	3.83	3.92	14.15	4.365	tr|G3V1D3|G3V1D3_HUMAN	Dipeptidyl peptidase 3 OS=Homo sapiens GN=DPP3 PE=1 SV=1	4	0.383707	0.346737	0.334195	0.691831	0.155597	0.413047	0.483059
764	3.77	3.96	18.48	6.087	sp|Q9UJW0|DCTN4_HUMAN	Dynactin subunit 4 OS=Homo sapiens GN=DCTN4 PE=1 SV=1	4	1.13763	1.03753	1.00925	0.972747	1.39316	1.21339	1.00925
765	3.75	5.66	17.8	8.197	sp|P24752|THIL_HUMAN	Acetyl-CoA acetyltransferase, mitochondrial OS=Homo sapiens GN=ACAT1 PE=1 SV=1	4	1	1.11686	0.737904	1.28233	1.92309	1.33045	0.895365
766	3.74	4.36	13.95	2.717	sp|Q9BSJ8|ESYT1_HUMAN	Extended synaptotagmin-1 OS=Homo sapiens GN=ESYT1 PE=1 SV=1	4	1.34276	0.685488	0.413047	0.981748	1.1272	1.1695	1.30617
767	3.68	5.19	22.63	7.621	sp|P35998|PRS7_HUMAN	26S protease regulatory subunit 7 OS=Homo sapiens GN=PSMC2 PE=1 SV=3	4	0.394457	0.380189	0.310456	0.519996	0.679204	0.564937	0.879023
768	3.66	3.83	17.69	3.462	sp|Q9H857|NT5D2_HUMAN	5'-nucleotidase domain-containing protein 2 OS=Homo sapiens GN=NT5DC2 PE=1 SV=1	4	0.139316	0.0717794	0.183654	0.299226	0.291072	0.231206	1.51356
769	3.63	3.73	9.123	1.895	sp|Q86YZ3|HORN_HUMAN	Hornerin OS=Homo sapiens GN=HRNR PE=1 SV=2	4	0.895365	1.05682	1.00925	0.954993	0.895365	0.758578	0.912011
770	3.6	6.75	25.99	10.34	sp|Q14344|GNA13_HUMAN	Guanine nucleotide-binding protein subunit alpha-13 OS=Homo sapiens GN=GNA13 PE=1 SV=2	4	2.18776	1.25893	0.134276	1.00925	2.37684	1.31826	1.08643
771	3.6	5.87	48.48	22.42	sp|P46783|RS10_HUMAN	40S ribosomal protein S10 OS=Homo sapiens GN=RPS10 PE=1 SV=1	4	1.21339	0.772681	0.801678	0.483059	2.18776	0.77983	0.428549
772	3.54	5.45	15.11	4.341	sp|Q8NBJ5|GT251_HUMAN	Procollagen galactosyltransferase 1 OS=Homo sapiens GN=COLGALT1 PE=1 SV=1	4	0.831764	0.636796	0.809096	0.912011	1.04713	0.928966	1.15878
773	3.47	3.57	53.17	33.33	sp|P49773|HINT1_HUMAN	Histidine triad nucleotide-binding protein 1 OS=Homo sapiens GN=HINT1 PE=1 SV=2	4	0.559758	1.24738	1.28233	0.691831	0.772681	0.879023	0.990832
774	3.46	4.61	19.3	10.53	sp|Q9HB71|CYBP_HUMAN	Calcyclin-binding protein OS=Homo sapiens GN=CACYBP PE=1 SV=2	4	0.376704	0.239883	0.192309	2.35505	0.159956	2.91072	1.27057
775	3.43	3.73	37.1	10.48	sp|P18124|RL7_HUMAN	60S ribosomal protein L7 OS=Homo sapiens GN=RPL7 PE=1 SV=1	4	0.862979	0.928966	0.77983	0.92045	1.15878	1.1272	0.816582
776	3.33	5.69	12.41	2.057	tr|A0A0A0MRV0|A0A0A0MRV0_HUMAN	Ribosome-binding protein 1 OS=Homo sapiens GN=RRBP1 PE=1 SV=1	4	1.02802	1.18032	1.09648	1.02802	1.75388	0.972747	0.954993
777	3.29	3.51	19.06	6.353	sp|O95810|SDPR_HUMAN	Serum deprivation-response protein OS=Homo sapiens GN=SDPR PE=1 SV=3	4	1.55597	0.937562	1.18032	1.18032	1	1.33045	0.92045
778	3.18	4.27	19.54	5.747	sp|P12956|XRCC6_HUMAN	X-ray repair cross-complementing protein 6 OS=Homo sapiens GN=XRCC6 PE=1 SV=2	4	1.15878	1.08643	1.07647	1.18032	1.18032	1.21339	1.24738
779	3.15	7.04	18.62	8.159	sp|Q14108|SCRB2_HUMAN	Lysosome membrane protein 2 OS=Homo sapiens GN=SCARB2 PE=1 SV=2	4	1.95884	2.10863	1.88799	0.954993	1.33045	1	0.698232
780	3.06	4.34	15.39	2.763	sp|P02786|TFR1_HUMAN	Transferrin receptor protein 1 OS=Homo sapiens GN=TFRC PE=1 SV=2	4	3.90841	3.25087	2.65461	4.96592	2.39883	4.36516	3.7325
781	3.04	3.87	14.63	3.789	sp|Q9BXW6|OSBL1_HUMAN	Oxysterol-binding protein-related protein 1 OS=Homo sapiens GN=OSBPL1A PE=1 SV=2	4	0.452898	0.255859	0.394457	1.33045	0.285759	0.534564	1.04713
782	3.02	4.49	21.57	9.804	tr|K7ER15|K7ER15_HUMAN	Haloacid dehalogenase-like hydrolase domain-containing protein 2 (Fragment) OS=Homo sapiens GN=HDHD2 PE=1 SV=1	4	1.10662	0.946237	1.65959	1.38038	1.01859	1.43219	0.954993
783	3.01	7.26	28.98	8.807	sp|Q9NYL9|TMOD3_HUMAN	Tropomodulin-3 OS=Homo sapiens GN=TMOD3 PE=1 SV=1	4	1.30617	1.44544	1.21339	0.77983	1.21339	0.887156	0.928966
784	2.97	4.17	20.22	8.261	tr|E9PFW3|E9PFW3_HUMAN	AP-2 complex subunit mu OS=Homo sapiens GN=AP2M1 PE=1 SV=1	4	0.625173	1.22462	1.77011	1.30617	1.5417	2.29087	1.24738
785	2.78	4.96	19.83	5.33	sp|Q7L099|RUFY3_HUMAN	Protein RUFY3 OS=Homo sapiens GN=RUFY3 PE=1 SV=1	4	1	1.0666	0.937562	1	0.990832	1.02802	1.05682
786	2.57	4.21	23.71	7.084	sp|Q9Y295|DRG1_HUMAN	Developmentally-regulated GTP-binding protein 1 OS=Homo sapiens GN=DRG1 PE=1 SV=1	4	0.887156	0.862979	0.912011	1.07647	1.15878	0.963829	1.21339
787	2.46	4.8	14.53	11.11	sp|Q14696|MESD_HUMAN	LDLR chaperone MESD OS=Homo sapiens GN=MESDC2 PE=1 SV=2	4	0.870964	1.04713	1	0.887156	0.824138	0.751623	0.809096
788	2.29	4.81	45.8	38.93	tr|H3BMD8|H3BMD8_HUMAN	cAMP-regulated phosphoprotein 19 OS=Homo sapiens GN=ARPP19 PE=1 SV=1	4	0.831764	1.83654	1.69044	0.765597	1.23595	0.549541	0.737904
789	2.21	4.31	21.51	10.75	sp|Q9NVJ2|ARL8B_HUMAN	ADP-ribosylation factor-like protein 8B OS=Homo sapiens GN=ARL8B PE=1 SV=1	4	1.49968	1.27057	1.11686	1.03753	1.22462	1.03753	1.03753
790	2.18	3.95	18.43	4.266	sp|P20700|LMNB1_HUMAN	Lamin-B1 OS=Homo sapiens GN=LMNB1 PE=1 SV=2	4	0.981748	0.816582	0.809096	0.698232	1.21339	0.698232	0.83946
791	2.16	3.83	17.47	7.831	sp|Q9UHD1|CHRD1_HUMAN	Cysteine and histidine-rich domain-containing protein 1 OS=Homo sapiens GN=CHORDC1 PE=1 SV=2	4	0.103753	0.0625173	0.0401791	1.47231	0.380189	1.04713	1.22462
792	2.15	2.96	10.54	1.167	sp|Q93008|USP9X_HUMAN	Probable ubiquitin carboxyl-terminal hydrolase FAF-X OS=Homo sapiens GN=USP9X PE=1 SV=3	4	0.912011	0.895365	0.613762	1	0.92045	0.862979	1.19124
793	2.07	6.13	9.404	1.663	tr|A0A0G2JPR0|A0A0G2JPR0_HUMAN	Complement C4-A OS=Homo sapiens GN=C4A PE=4 SV=1	4	0.77983	0.744732	0.685488	0.990832	0.474242	0.809096	0.744732
794	2.04	2.08	25.86	16.67	tr|H3BUP2|H3BUP2_HUMAN	Nucleolar protein 3 (Fragment) OS=Homo sapiens GN=NOL3 PE=1 SV=1	4	0.887156	1.61436	1.55597	1.0666	1.23595	0.954993	1.27057
795	2.03	2.81	8.721	0.8068	sp|O75179|ANR17_HUMAN	Ankyrin repeat domain-containing protein 17 OS=Homo sapiens GN=ANKRD17 PE=1 SV=3	4	1.22462	1.01859	0.0144544	1.19124	2.07014	1.64437	4.65586
796	2.01	4.21	11.65	1.488	sp|P00533|EGFR_HUMAN	Epidermal growth factor receptor OS=Homo sapiens GN=EGFR PE=1 SV=2	4	0.801678	0.704693	0.630957	0.847227	0.648634	0.870964	1.03753
797	2.01	4.04	24.26	7.353	tr|J3KR44|J3KR44_HUMAN	Ubiquitin thioesterase OTUB1 OS=Homo sapiens GN=OTUB1 PE=1 SV=2	4	0.383707	0.436516	0.413047	0.758578	0.366438	0.501187	0.83946
798	2	6.01	42.15	33.06	tr|L7N2F9|L7N2F9_HUMAN	Uncharacterized protein (Fragment) OS=Homo sapiens PE=4 SV=1	4	1.80302	3.0761	1.70608	0.928966	1.94089	1.14815	0.862979
799	2	5.1	22.12	17.79	sp|P14649|MYL6B_HUMAN	Myosin light chain 6B OS=Homo sapiens GN=MYL6B PE=1 SV=1	4	1.7378	1.45881	1.30617	1.03753	1.05682	1.00925	0.824138
800	2	4.84	22.95	13.52	sp|Q6IQ22|RAB12_HUMAN	Ras-related protein Rab-12 OS=Homo sapiens GN=RAB12 PE=1 SV=3	4	4.40555	2.51189	2.35505	3.10456	4.65586	4.32514	6.08135
801	2	4.43	12.26	1.106	sp|O75923|DYSF_HUMAN	Dysferlin OS=Homo sapiens GN=DYSF PE=1 SV=1	4	0.794328	0.831764	0.772681	0.809096	0.704693	0.685488	1.5417
802	2	3.02	16.01	2.391	sp|O43592|XPOT_HUMAN	Exportin-T OS=Homo sapiens GN=XPOT PE=1 SV=2	4	0.92045	0.946237	0.654636	1.45881	0.895365	1.07647	1.38038
803	2	2.98	13.21	8.176	tr|F5H872|F5H872_HUMAN	Mediator of RNA polymerase II transcription subunit 21 OS=Homo sapiens GN=MED21 PE=1 SV=1	4	87.9023	84.7227	87.9023	87.0964	87.9023	0.990832	86.2979
804	2	2.56	7.534	4.452	sp|Q16635|TAZ_HUMAN	Tafazzin OS=Homo sapiens GN=TAZ PE=1 SV=1	4	0.390841	0.177011	0.296483	1.04713	0.322107	0.299226	0.963829
805	1.47	4.49	17.03	5.946	tr|I3L0A0|I3L0A0_HUMAN	HCG2044781 OS=Homo sapiens GN=TMEM189-UBE2V1 PE=4 SV=1	4	0.280543	0.436516	0.737904	0.580764	0.428549	0.711214	0.77983
806	7.07	7.14	38.18	13.45	sp|Q9UBW8|CSN7A_HUMAN	COP9 signalosome complex subunit 7a OS=Homo sapiens GN=COPS7A PE=1 SV=1	3	0.630957	0.580764	0.465586	1.43219	0.47863	0.809096	0.895365
807	6.59	6.63	15.9	9.249	sp|P31942|HNRH3_HUMAN	Heterogeneous nuclear ribonucleoprotein H3 OS=Homo sapiens GN=HNRNPH3 PE=1 SV=2	3	3.76704	4.40555	0.724436	3.80189	4.74242	5.10505	5.15229
808	6.51	6.53	30.21	18.75	sp|Q07812|BAX_HUMAN	Apoptosis regulator BAX OS=Homo sapiens GN=BAX PE=1 SV=1	3	0.887156	1.09648	0.816582	3.25087	0.101859	0.310456	1.39316
809	6.5	6.55	17.34	3.392	sp|Q96QK1|VPS35_HUMAN	Vacuolar protein sorting-associated protein 35 OS=Homo sapiens GN=VPS35 PE=1 SV=2	3	0.487529	0.409261	0.258226	1.38038	0.244343	0.691831	1.04713
810	6.5	6.54	32.45	15.43	tr|H0YG54|H0YG54_HUMAN	Oligoribonuclease, mitochondrial OS=Homo sapiens GN=REXO2 PE=1 SV=2	3	0.855067	1.1695	1.51356	1.47231	1.11686	0.954993	0.737904
811	6.49	6.51	42.86	29.59	sp|P04080|CYTB_HUMAN	Cystatin-B OS=Homo sapiens GN=CSTB PE=1 SV=2	3	1.55597	2.63027	5.15229	1.43219	1.2942	2.14783	1.08643
812	6.41	6.75	30.07	16.43	sp|P47755|CAZA2_HUMAN	F-actin-capping protein subunit alpha-2 OS=Homo sapiens GN=CAPZA2 PE=1 SV=3	3	1.30617	0.928966	0.591562	1.7378	1.00925	1.58489	1.18032
813	6.34	6.57	16.22	2.571	sp|Q9Y2A7|NCKP1_HUMAN	Nck-associated protein 1 OS=Homo sapiens GN=NCKAP1 PE=1 SV=1	3	0.83946	0.847227	0.711214	0.870964	0.903649	0.855067	0.981748
814	6.34	6.35	45.58	22.45	sp|P49789|FHIT_HUMAN	Bis(5'-adenosyl)-triphosphatase OS=Homo sapiens GN=FHIT PE=1 SV=3	3	1.77011	2.44343	3.28095	1.30617	0.937562	0.972747	1.88799
815	6.33	6.38	22.44	11.22	sp|Q9UNE7|CHIP_HUMAN	E3 ubiquitin-protein ligase CHIP OS=Homo sapiens GN=STUB1 PE=1 SV=2	3	2.75423	1.87068	1.90546	2.01372	3.10456	3.49945	2.0893
816	6.31	6.32	27.16	9.904	tr|A0A0C4DFN3|A0A0C4DFN3_HUMAN	Monoglyceride lipase OS=Homo sapiens GN=MGLL PE=1 SV=1	3	0.267917	0.134276	0.30761	1.90546	0.946237	0.258226	1.41906
817	6.28	6.3	25.18	14.18	sp|P10768|ESTD_HUMAN	S-formylglutathione hydrolase OS=Homo sapiens GN=ESD PE=1 SV=2	3	0.224905	0.331131	0.145881	0.636796	0.231206	0.666807	0.903649
818	6.21	6.29	19.41	5.545	sp|Q9Y3I0|RTCB_HUMAN	tRNA-splicing ligase RtcB homolog OS=Homo sapiens GN=RTCB PE=1 SV=1	3	0.946237	1.11686	1.14815	0.824138	1.33045	1.11686	1.15878
819	6.18	6.34	42.39	12.76	sp|P23396|RS3_HUMAN	40S ribosomal protein S3 OS=Homo sapiens GN=RPS3 PE=1 SV=2	3	1.22462	1.05682	0.597035	1.58489	1.87068	0.824138	1.6293
820	6.17	6.21	35.2	22.4	sp|P62851|RS25_HUMAN	40S ribosomal protein S25 OS=Homo sapiens GN=RPS25 PE=1 SV=1	3	4.28549	3.94457	2.83139	1.61436	6.30957	2.24905	1.31826
821	6.16	6.54	27.68	11.16	sp|Q00688|FKBP3_HUMAN	Peptidyl-prolyl cis-trans isomerase FKBP3 OS=Homo sapiens GN=FKBP3 PE=1 SV=1	3	2.53513	5.80764	5.91562	2.75423	5.44503	2.70396	1.15878
822	6.13	6.14	11.06	4.966	sp|P14384|CBPM_HUMAN	Carboxypeptidase M OS=Homo sapiens GN=CPM PE=1 SV=2	3	9.72747	10.1859	4.57088	2.26986	1.30617	2.53513	4.61318
823	6.11	6.12	34.12	15.64	sp|Q9BRJ7|SDOS_HUMAN	Protein syndesmos OS=Homo sapiens GN=NUDT16L1 PE=1 SV=1	3	0.175388	0.394457	0.487529	0.912011	0.465586	0.416869	0.870964
824	6.1	6.2	28.9	11.03	sp|P62701|RS4X_HUMAN	40S ribosomal protein S4, X isoform OS=Homo sapiens GN=RPS4X PE=1 SV=2	3	1.10662	0.698232	0.554626	1.21339	2.14783	1.40605	0.928966
825	6.08	6.14	25.46	10.43	tr|E7EM64|E7EM64_HUMAN	COP9 signalosome complex subunit 6 OS=Homo sapiens GN=COPS6 PE=1 SV=1	3	0.0972747	0.534564	0.175388	1.8197	0.108643	0.704693	0.972747
826	6.06	6.07	23.18	12.11	sp|O43396|TXNL1_HUMAN	Thioredoxin-like protein 1 OS=Homo sapiens GN=TXNL1 PE=1 SV=3	3	0.758578	1.01859	0.801678	1.95884	0.981748	1.24738	1.27057
827	6.04	6.04	29.79	19.68	sp|O75915|PRAF3_HUMAN	PRA1 family protein 3 OS=Homo sapiens GN=ARL6IP5 PE=1 SV=1	3	14.9968	9.81748	5.70164	10.2802	15.1356	11.1686	7.65597
828	6.03	6.26	18.59	9.295	sp|Q96QR8|PURB_HUMAN	Transcriptional activator protein Pur-beta OS=Homo sapiens GN=PURB PE=1 SV=3	3	1.18032	1.30617	1.07647	1.07647	0.928966	0.879023	1.14815
829	6.01	6.01	32.88	29.45	sp|P01034|CYTC_HUMAN	Cystatin-C OS=Homo sapiens GN=CST3 PE=1 SV=1	3	3.19154	3.31131	3.19154	0.903649	2.63027	3.16228	7.65597
830	6	6.2	27.51	13.76	sp|O43674|NDUB5_HUMAN	NADH dehydrogenase [ubiquinone] 1 beta subcomplex subunit 5, mitochondrial OS=Homo sapiens GN=NDUFB5 PE=1 SV=1	3	0.30761	0.608135	0.704693	0.49204	0.387258	0.331131	0.654636
831	6	6.06	5.438	2.021	sp|E9PAV3|NACAM_HUMAN	Nascent polypeptide-associated complex subunit alpha, muscle-specific form OS=Homo sapiens GN=NACA PE=1 SV=1	3	1.48594	2.07014	2.88403	1.5417	1.28233	1.0666	1.33045
832	6	6.04	16.39	4.392	sp|O00186|STXB3_HUMAN	Syntaxin-binding protein 3 OS=Homo sapiens GN=STXBP3 PE=1 SV=2	3	3.04789	1.36773	0.280543	1.07647	5.80764	1.07647	3.31131
833	6	6.03	18.91	6.742	sp|Q8NF37|PCAT1_HUMAN	Lysophosphatidylcholine acyltransferase 1 OS=Homo sapiens GN=LPCAT1 PE=1 SV=2	3	16.1436	9.54993	6.72977	8.95365	23.9883	14.3219	8.70964
834	6	6.01	14.92	5.692	sp|Q9H4A4|AMPB_HUMAN	Aminopeptidase B OS=Homo sapiens GN=RNPEP PE=1 SV=2	3	0.744732	0.383707	0.586138	0.751623	0.222844	0.42462	1.23595
835	6	6.01	30.92	12.45	sp|Q06323|PSME1_HUMAN	Proteasome activator complex subunit 1 OS=Homo sapiens GN=PSME1 PE=1 SV=1	3	13.8038	14.8594	7.04693	2.03236	0.809096	1.61436	10.7647
836	6	6.01	17.25	6.5	tr|H3BS72|H3BS72_HUMAN	Very-long-chain (3R)-3-hydroxyacyl-CoA dehydratase 3 OS=Homo sapiens GN=HACD3 PE=1 SV=1	3	1.41906	1.30617	1	1.47231	2.42103	1.65959	1.48594
837	6	6.01	28.23	20.1	sp|Q99627|CSN8_HUMAN	COP9 signalosome complex subunit 8 OS=Homo sapiens GN=COPS8 PE=1 SV=1	3	0.816582	0.737904	0.895365	1.19124	1	1.28233	0.744732
838	6	6.01	14.29	8.766	sp|Q9NZ01|TECR_HUMAN	Very-long-chain enoyl-CoA reductase OS=Homo sapiens GN=TECR PE=1 SV=1	3	5.54626	3.13329	0.831764	39.0841	42.462	28.5759	1.90546
839	6	6.01	40.91	30.3	sp|P25398|RS12_HUMAN	40S ribosomal protein S12 OS=Homo sapiens GN=RPS12 PE=1 SV=3	3	99.0832	99.0832	99.0832	99.0832	99.0832	99.0832	99.0832
840	6	6	19.19	10.33	sp|P21964|COMT_HUMAN	Catechol O-methyltransferase OS=Homo sapiens GN=COMT PE=1 SV=2	3	2.96483	2.05116	1.48594	1.31826	2.42103	2.35505	2.48886
841	6	6	47.96	37.76	sp|P01040|CYTA_HUMAN	Cystatin-A OS=Homo sapiens GN=CSTA PE=1 SV=1	3	0.912011	1.02802	1.15878	1.41906	0.505825	0.625173	1.21339
842	6	6	43.06	43.06	sp|Q9UBI6|GBG12_HUMAN	Guanine nucleotide-binding protein G(I)/G(S)/G(O) subunit gamma-12 OS=Homo sapiens GN=GNG12 PE=1 SV=3	3	1	0.895365	0.691831	0.630957	0.816582	0.787046	1.04713
843	5.96	6	42.11	29.32	tr|V9GYM3|V9GYM3_HUMAN	Apolipoprotein A-II OS=Homo sapiens GN=APOA2 PE=1 SV=1	3	0.0275423	0.0280543	0.608135	0.428549	0.0167494	0.224905	0.0299226
844	5.95	6.03	41.72	18.54	sp|P62277|RS13_HUMAN	40S ribosomal protein S13 OS=Homo sapiens GN=RPS13 PE=1 SV=2	3	0.887156	1.19124	0.809096	0.946237	1.97697	0.758578	1.15878
845	5.92	6.04	25	11.33	sp|O95749|GGPPS_HUMAN	Geranylgeranyl pyrophosphate synthase OS=Homo sapiens GN=GGPS1 PE=1 SV=1	3	1.08643	0.972747	1.1695	1.64437	0.937562	1.47231	1.33045
846	5.92	6.01	16.58	8.808	sp|P54687|BCAT1_HUMAN	Branched-chain-amino-acid aminotransferase, cytosolic OS=Homo sapiens GN=BCAT1 PE=1 SV=3	3	0.816582	0.765597	1.13763	1.1272	0.92045	0.765597	0.549541
847	5.92	6.01	35.47	18.02	sp|Q9UMX5|NENF_HUMAN	Neudesin OS=Homo sapiens GN=NENF PE=1 SV=1	3	11.1686	12.7057	8.01678	3.66438	6.54636	5.24807	5.39511
848	5.92	6	48.05	41.56	sp|Q8NHG7|SVIP_HUMAN	Small VCP/p97-interacting protein OS=Homo sapiens GN=SVIP PE=1 SV=1	3	3.0761	3.43558	2.10863	0.824138	1.85353	2.12814	0.515229
849	5.89	5.93	28.96	21.31	sp|P62256|UBE2H_HUMAN	Ubiquitin-conjugating enzyme E2 H OS=Homo sapiens GN=UBE2H PE=1 SV=1	3	11.695	4.57088	13.8038	3.16228	1.2942	2.37684	0.369828
850	5.89	5.92	35.45	31.82	sp|P20472|PRVA_HUMAN	Parvalbumin alpha OS=Homo sapiens GN=PVALB PE=1 SV=2	3	0.416869	0.369828	0.161436	0.405509	0.346737	0.47863	0.432514
851	5.87	5.9	18.09	9.574	sp|Q9HB07|MYG1_HUMAN	UPF0160 protein MYG1, mitochondrial OS=Homo sapiens GN=C12orf10 PE=1 SV=2	3	0.515229	0.724436	1.07647	1.35519	0.698232	1.2942	1.2942
852	5.74	5.89	47.4	20.13	sp|P68036|UB2L3_HUMAN	Ubiquitin-conjugating enzyme E2 L3 OS=Homo sapiens GN=UBE2L3 PE=1 SV=1	3	2.55859	2.12814	3.10456	1.21339	3.90841	3.19154	1.8197
853	5.72	5.83	13.8	7.431	sp|Q9UK99|FBX3_HUMAN	F-box only protein 3 OS=Homo sapiens GN=FBXO3 PE=1 SV=3	3	0.469894	0.432514	0.369828	1.34276	0.772681	1.38038	1.31826
854	5.72	5.81	16.17	10.23	sp|Q9UBR2|CATZ_HUMAN	Cathepsin Z OS=Homo sapiens GN=CTSZ PE=1 SV=1	3	0.887156	0.937562	0.981748	0.319154	0.981748	0.366438	0.349945
855	5.67	5.81	27.58	7.317	tr|E9PF82|E9PF82_HUMAN	Calcium/calmodulin-dependent protein kinase type II subunit delta OS=Homo sapiens GN=CAMK2D PE=1 SV=1	3	0.731139	0.717794	0.824138	0.990832	0.903649	0.879023	0.831764
856	5.6	5.68	31.49	13.81	tr|F8VUA2|F8VUA2_HUMAN	Charged multivesicular body protein 1a OS=Homo sapiens GN=CHMP1A PE=1 SV=1	3	1.80302	1.87068	1.94089	1.23595	1.02802	0.440555	0.912011
857	5.6	5.66	24.67	14.98	sp|Q9UIJ7|KAD3_HUMAN	GTP:AMP phosphotransferase AK3, mitochondrial OS=Homo sapiens GN=AK3 PE=1 SV=4	3	1.21339	1.08643	0.591562	0.981748	1.69044	1.01859	1.11686
858	5.52	5.83	40.91	15.15	tr|K7EK07|K7EK07_HUMAN	Histone H3 (Fragment) OS=Homo sapiens GN=H3F3B PE=1 SV=1	3	0.30479	0.679204	1.09648	1.23595	1.07647	1.05682	0.313329
859	5.48	5.59	19.68	5.95	sp|Q9UN37|VPS4A_HUMAN	Vacuolar protein sorting-associated protein 4A OS=Homo sapiens GN=VPS4A PE=1 SV=1	3	1.45881	1.18032	0.862979	1.61436	1.8197	1.02802	1.14815
860	5.46	5.51	20.56	12.62	tr|F8VXU5|F8VXU5_HUMAN	Vacuolar protein sorting-associated protein 29 OS=Homo sapiens GN=VPS29 PE=1 SV=1	3	1.48594	3.7325	3.80189	5.64937	4.20727	4.36516	2.1677
861	5.39	5.44	19.34	11.31	sp|Q9H0E2|TOLIP_HUMAN	Toll-interacting protein OS=Homo sapiens GN=TOLLIP PE=1 SV=1	3	1.22462	1.27057	1.35519	1.24738	0.954993	1.23595	1
862	5.31	5.38	21.5	6.681	tr|F8W8W7|F8W8W7_HUMAN	Trans-Golgi network integral membrane protein 2 OS=Homo sapiens GN=TGOLN2 PE=1 SV=2	3	8.16582	9.72747	5.7544	2.75423	4.52898	1.67494	1.77011
863	5.29	5.36	35.58	29.45	sp|Q9BX68|HINT2_HUMAN	Histidine triad nucleotide-binding protein 2, mitochondrial OS=Homo sapiens GN=HINT2 PE=1 SV=1	3	1.1695	2.48886	1.2942	0.809096	2.14783	1.30617	0.666807
864	5.26	5.33	18.81	8.416	sp|P13861|KAP2_HUMAN	cAMP-dependent protein kinase type II-alpha regulatory subunit OS=Homo sapiens GN=PRKAR2A PE=1 SV=2	3	0.77983	0.636796	0.127057	2.10863	1.7378	1.52757	1.7378
865	5.25	5.31	30	17.06	tr|E9PL57|E9PL57_HUMAN	Protein NEDD8-MDP1 (Fragment) OS=Homo sapiens GN=NEDD8-MDP1 PE=4 SV=1	3	2.03236	4.9204	5.64937	0.613762	1.57036	1.48594	1.27057
866	5.21	5.27	17.88	9.394	sp|P62136|PP1A_HUMAN	Serine/threonine-protein phosphatase PP1-alpha catalytic subunit OS=Homo sapiens GN=PPP1CA PE=1 SV=1	3	1.39316	1.41906	0.787046	1.24738	0.972747	1.39316	1.52757
867	5.17	5.24	43.88	30.61	sp|Q99584|S10AD_HUMAN	Protein S100-A13 OS=Homo sapiens GN=S100A13 PE=1 SV=1	3	2.51189	11.8032	7.04693	3.13329	1.35519	1.8197	1.5417
868	5.15	5.33	21.1	7.033	sp|Q13867|BLMH_HUMAN	Bleomycin hydrolase OS=Homo sapiens GN=BLMH PE=1 SV=1	3	0.313329	0.554626	1.05682	0.794328	0.376704	0.648634	0.855067
869	5.14	5.27	26.74	8.681	sp|Q02878|RL6_HUMAN	60S ribosomal protein L6 OS=Homo sapiens GN=RPL6 PE=1 SV=3	3	0.60256	0.586138	0.580764	0.630957	1.65959	0.895365	0.711214
870	5.09	5.19	34.5	11.63	sp|O75822|EIF3J_HUMAN	Eukaryotic translation initiation factor 3 subunit J OS=Homo sapiens GN=EIF3J PE=1 SV=2	3	0.660693	1.47231	0.954993	0.619441	0.816582	0.457088	0.928966
871	5.07	5.23	31.25	11.84	sp|P02686|MBP_HUMAN	Myelin basic protein OS=Homo sapiens GN=MBP PE=1 SV=3	3	4.7863	5.10505	5.34564	1.39316	1.20226	0.751623	1.67494
872	5.06	5.12	20.06	10.83	sp|Q9BRF8|CPPED_HUMAN	Serine/threonine-protein phosphatase CPPED1 OS=Homo sapiens GN=CPPED1 PE=1 SV=3	3	0.717794	0.972747	1.07647	0.816582	0.660693	0.737904	0.946237
873	5.04	5.13	40	25.71	sp|Q9Y3U8|RL36_HUMAN	60S ribosomal protein L36 OS=Homo sapiens GN=RPL36 PE=1 SV=3	3	1.40605	2.24905	1.52757	1.7378	2.55859	2.208	1.33045
874	5.04	5.1	14.05	6.387	sp|O15371|EIF3D_HUMAN	Eukaryotic translation initiation factor 3 subunit D OS=Homo sapiens GN=EIF3D PE=1 SV=1	3	0.928966	0.672977	1.04713	1.14815	1.00925	0.879023	1.00925
875	5.03	5.28	17.65	4.902	sp|Q8NC51|PAIRB_HUMAN	Plasminogen activator inhibitor 1 RNA-binding protein OS=Homo sapiens GN=SERBP1 PE=1 SV=2	3	4.28549	6.42688	3.49945	0.672977	4.65586	0.887156	1.72187
876	5.02	5.08	14.98	5.253	sp|Q9H0C3|TM117_HUMAN	Transmembrane protein 117 OS=Homo sapiens GN=TMEM117 PE=2 SV=1	3	13.0617	5.54626	12.4738	16.9044	2.88403	7.58578	12.7057
877	4.98	5.04	8.623	4.841	sp|Q9UI40|NCKX2_HUMAN	Sodium/potassium/calcium exchanger 2 OS=Homo sapiens GN=SLC24A2 PE=1 SV=1	3	1.19124	0.946237	0.801678	1.02802	0.787046	1.40605	0.981748
878	4.95	5.22	13.33	1.667	tr|E7EUU4|E7EUU4_HUMAN	Eukaryotic translation initiation factor 4 gamma 1 OS=Homo sapiens GN=EIF4G1 PE=1 SV=1	3	0.831764	0.724436	0.794328	1.43219	1.39316	0.972747	1.19124
879	4.9	4.96	38.42	12.32	sp|P40429|RL13A_HUMAN	60S ribosomal protein L13a OS=Homo sapiens GN=RPL13A PE=1 SV=2	3	0.824138	1.25893	0.824138	0.92045	2.12814	1.33045	1.04713
880	4.88	5.06	30.88	13.36	sp|P62993|GRB2_HUMAN	Growth factor receptor-bound protein 2 OS=Homo sapiens GN=GRB2 PE=1 SV=1	3	1.5417	1.58489	2.58226	1.30617	2.1677	2.29087	0.946237
881	4.88	5.05	21.43	11.79	sp|Q9H3N1|TMX1_HUMAN	Thioredoxin-related transmembrane protein 1 OS=Homo sapiens GN=TMX1 PE=1 SV=1	3	1.33045	1.1272	0.895365	0.731139	1.61436	0.679204	0.981748
882	4.88	4.98	36.99	30.14	sp|Q9NZT1|CALL5_HUMAN	Calmodulin-like protein 5 OS=Homo sapiens GN=CALML5 PE=1 SV=2	3	0.895365	0.928966	1.14815	0.928966	0.954993	0.824138	0.870964
883	4.86	5.04	39.5	18.49	sp|O95298|NDUC2_HUMAN	NADH dehydrogenase [ubiquinone] 1 subunit C2 OS=Homo sapiens GN=NDUFC2 PE=1 SV=1	3	0.420727	0.363078	0.554626	0.972747	0.380189	0.359749	0.57544
884	4.85	4.94	55.37	19.83	tr|A0A024QZ42|A0A024QZ42_HUMAN	HCG1985580, isoform CRA_c OS=Homo sapiens GN=PDCD6 PE=1 SV=1	3	1.52757	0.580764	0.772681	3.87258	0.879023	0.717794	1.22462
885	4.83	5.08	24.23	9.471	sp|P50148|GNAQ_HUMAN	Guanine nucleotide-binding protein G(q) subunit alpha OS=Homo sapiens GN=GNAQ PE=1 SV=4	3	1.77011	0.879023	0.0981748	1.34276	1.20226	0.937562	0.954993
886	4.78	4.83	16.38	9.483	sp|Q14376|GALE_HUMAN	UDP-glucose 4-epimerase OS=Homo sapiens GN=GALE PE=1 SV=2	3	0.564937	0.758578	0.954993	0.787046	0.619441	0.879023	1.20226
887	4.76	4.84	31.55	16.5	sp|Q9NP72|RAB18_HUMAN	Ras-related protein Rab-18 OS=Homo sapiens GN=RAB18 PE=1 SV=1	3	0.887156	0.895365	0.704693	1.22462	0.92045	1.11686	1.27057
888	4.74	5.07	14.81	6.753	sp|P35613|BASI_HUMAN	Basigin OS=Homo sapiens GN=BSG PE=1 SV=2	3	2.83139	1.85353	3.01995	0.751623	2.05116	0.83946	0.42462
889	4.71	4.75	30.41	21.62	sp|Q04837|SSBP_HUMAN	Single-stranded DNA-binding protein, mitochondrial OS=Homo sapiens GN=SSBP1 PE=1 SV=1	3	1.01859	1.22462	0.937562	0.534564	0.92045	0.636796	0.586138
890	4.66	4.71	11.55	8.108	sp|Q16186|ADRM1_HUMAN	Proteasomal ubiquitin receptor ADRM1 OS=Homo sapiens GN=ADRM1 PE=1 SV=2	3	1.0666	0.92045	0.831764	1.02802	1.28233	1.19124	0.824138
891	4.62	4.63	17.78	10.22	tr|M0R0R2|M0R0R2_HUMAN	40S ribosomal protein S5 OS=Homo sapiens GN=RPS5 PE=1 SV=1	3	2.35505	3.40408	1.11686	1.13763	4.05509	2.51189	0.879023
892	4.61	4.76	17.52	7.677	sp|Q9Y285|SYFA_HUMAN	Phenylalanine--tRNA ligase alpha subunit OS=Homo sapiens GN=FARSA PE=1 SV=3	3	0.711214	0.679204	0.0110662	1.24738	1.57036	1.19124	0.879023
893	4.56	4.61	12.97	5.501	tr|C9JMV9|C9JMV9_HUMAN	Protein ABHD14A-ACY1 OS=Homo sapiens GN=ABHD14A-ACY1 PE=4 SV=1	3	0.505825	2.37684	3.90841	3.49945	0.597035	1.1272	2.75423
894	4.53	4.61	24.43	11.76	sp|Q9UK41|VPS28_HUMAN	Vacuolar protein sorting-associated protein 28 homolog OS=Homo sapiens GN=VPS28 PE=1 SV=1	3	3.59749	2.88403	2.67917	2.35505	1.24738	2.31206	0.737904
895	4.51	4.54	36.92	22.31	sp|P62244|RS15A_HUMAN	40S ribosomal protein S15a OS=Homo sapiens GN=RPS15A PE=1 SV=2	3	21.8776	23.5505	1.10662	20.893	40.9261	28.3139	17.8649
896	4.45	4.48	22.12	17.31	tr|F8VZI9|F8VZI9_HUMAN	Protein lifeguard 2 OS=Homo sapiens GN=FAIM2 PE=1 SV=1	3	6.79204	6.42688	4.13048	0.946237	0.772681	1.09648	0.895365
897	4.41	4.84	17.08	3.279	sp|P13010|XRCC5_HUMAN	X-ray repair cross-complementing protein 5 OS=Homo sapiens GN=XRCC5 PE=1 SV=3	3	0.534564	0.30761	0.380189	0.724436	0.465586	0.794328	1.27057
898	4.41	4.47	24.76	5.288	tr|J3KQ32|J3KQ32_HUMAN	Obg-like ATPase 1 OS=Homo sapiens GN=OLA1 PE=1 SV=1	3	0.0895365	0.0474242	0.0765597	2.46604	0.946237	1.92309	1.48594
899	4.36	4.45	12.62	3.083	sp|O95373|IPO7_HUMAN	Importin-7 OS=Homo sapiens GN=IPO7 PE=1 SV=1	3	0.199526	0.564937	0.0270396	1.72187	0.772681	1.03753	1.20226
900	4.26	4.36	13.68	4.788	sp|Q96AQ6|PBIP1_HUMAN	Pre-B-cell leukemia transcription factor-interacting protein 1 OS=Homo sapiens GN=PBXIP1 PE=1 SV=1	3	1.13763	1.04713	1.15878	0.92045	1.11686	0.895365	1.0666
901	4.2	4.28	16.25	12.5	sp|P51858|HDGF_HUMAN	Hepatoma-derived growth factor OS=Homo sapiens GN=HDGF PE=1 SV=1	3	0.448745	3.04789	2.48886	0.855067	2.14783	1.2942	1.65959
902	4.17	6.28	11.73	2.132	tr|C9JZR2|C9JZR2_HUMAN	Catenin delta-1 OS=Homo sapiens GN=CTNND1 PE=1 SV=2	3	4.13048	0.981748	0.343558	5.97035	10.7647	9.46237	3.46737
903	4.16	4.25	32.68	15.12	tr|E7ES52|E7ES52_HUMAN	Cyclin-dependent kinase inhibitor 1B OS=Homo sapiens GN=CDKN1B PE=1 SV=1	3	2.93765	4.44631	6.72977	1.5417	4.87528	3.13329	2.0893
904	4.14	6.18	19.05	6.266	sp|O43813|LANC1_HUMAN	LanC-like protein 1 OS=Homo sapiens GN=LANCL1 PE=1 SV=1	3	0.188799	0.0787046	0.242103	0.981748	0.135519	0.801678	1.01859
905	4.09	6.65	17.3	2.857	tr|G3V5R9|G3V5R9_HUMAN	Kinesin light chain 1 OS=Homo sapiens GN=KLC1 PE=1 SV=1	3	0.847227	0.613762	0.625173	0.744732	0.660693	0.724436	0.765597
906	4.08	4.12	31.76	20.27	sp|O60869|EDF1_HUMAN	Endothelial differentiation-related factor 1 OS=Homo sapiens GN=EDF1 PE=1 SV=1	3	0.928966	1.40605	1.36773	0.731139	0.937562	0.515229	0.928966
907	4.07	4.11	18.9	3.853	sp|Q9UEW8|STK39_HUMAN	STE20/SPS1-related proline-alanine-rich protein kinase OS=Homo sapiens GN=STK39 PE=1 SV=3	3	0.801678	0.816582	0.60256	1.07647	1.0666	1.05682	1.09648
908	4.05	4.17	20.92	9.586	sp|Q02790|FKBP4_HUMAN	Peptidyl-prolyl cis-trans isomerase FKBP4 OS=Homo sapiens GN=FKBP4 PE=1 SV=3	3	0.277971	0.0737904	0.0895365	0.534564	0.092045	0.47863	1.02802
909	4.05	4.15	20.99	7.075	sp|O95630|STABP_HUMAN	STAM-binding protein OS=Homo sapiens GN=STAMBP PE=1 SV=1	3	0.801678	0.717794	0.496592	1.47231	1.92309	1.78649	1.59956
910	4.03	6.04	23.24	9.48	sp|O75436|VP26A_HUMAN	Vacuolar protein sorting-associated protein 26A OS=Homo sapiens GN=VPS26A PE=1 SV=2	3	0.887156	0.654636	0.744732	1.01859	0.613762	0.744732	0.946237
911	4.02	4.88	16.36	2.726	sp|P19367|HXK1_HUMAN	Hexokinase-1 OS=Homo sapiens GN=HK1 PE=1 SV=3	3	1.21339	1.0666	1.20226	1.23595	1	1.19124	1.1695
912	4.02	4.02	20.88	17.03	sp|Q16082|HSPB2_HUMAN	Heat shock protein beta-2 OS=Homo sapiens GN=HSPB2 PE=1 SV=2	3	0.887156	1.30617	1.0666	0.529663	0.57544	0.704693	0.824138
913	4	4.5	45.6	26.4	sp|Q9NRX4|PHP14_HUMAN	14 kDa phosphohistidine phosphatase OS=Homo sapiens GN=PHPT1 PE=1 SV=1	3	0.912011	1.1695	1.59956	1.20226	1.45881	1.30617	1.20226
914	4	4.2	15.66	5.696	sp|A1L0T0|ILVBL_HUMAN	Acetolactate synthase-like protein OS=Homo sapiens GN=ILVBL PE=1 SV=2	3	1.15878	0.990832	1.07647	0.954993	0.794328	0.672977	1.43219
915	4	4.16	15.46	7.895	tr|N0E472|N0E472_HUMAN	Casein kinase II subunit beta OS=Homo sapiens GN=CSNK2B-LY6G5B--991 PE=2 SV=1	3	1.09648	0.990832	1.45881	1.39316	1.01859	1.0666	0.963829
916	4	4.1	27.69	8.846	sp|O60762|DPM1_HUMAN	Dolichol-phosphate mannosyltransferase subunit 1 OS=Homo sapiens GN=DPM1 PE=1 SV=1	3	12.1339	7.17794	5.24807	2.01372	13.9316	6.42688	4.28549
917	4	4.09	23.67	3.977	sp|P54577|SYYC_HUMAN	Tyrosine--tRNA ligase, cytoplasmic OS=Homo sapiens GN=YARS PE=1 SV=4	3	0.711214	0.376704	0.0440555	1.21339	0.666807	1.28233	1.33045
918	4	4.03	19.92	10.55	sp|P24539|AT5F1_HUMAN	ATP synthase F(0) complex subunit B1, mitochondrial OS=Homo sapiens GN=ATP5F1 PE=1 SV=2	3	1.31826	0.937562	1.08643	1.0666	1.02802	0.816582	1.07647
919	4	4.01	42.71	29.17	sp|Q9NP97|DLRB1_HUMAN	Dynein light chain roadblock-type 1 OS=Homo sapiens GN=DYNLRB1 PE=1 SV=3	3	2.01372	3.25087	3.16228	0.990832	1.0666	1.25893	1.04713
920	4	4	19.81	7.121	sp|Q08722|CD47_HUMAN	Leukocyte surface antigen CD47 OS=Homo sapiens GN=CD47 PE=1 SV=1	3	1.11686	1.09648	0.946237	0.972747	0.83946	1.64437	1.07647
921	3.98	4.28	12.67	4.223	sp|O00629|IMA3_HUMAN	Importin subunit alpha-3 OS=Homo sapiens GN=KPNA4 PE=1 SV=1	3	0.465586	0.685488	0.895365	4.61318	1.57036	2.80543	1.95884
922	3.96	4.9	12.95	2.854	sp|Q9H330|TM245_HUMAN	Transmembrane protein 245 OS=Homo sapiens GN=TMEM245 PE=1 SV=2	3	5.86138	2.67917	5.24807	2.88403	9.12011	2.53513	3.66438
923	3.95	4.08	17.68	9.003	sp|Q9HAB8|PPCS_HUMAN	Phosphopantothenate--cysteine ligase OS=Homo sapiens GN=PPCS PE=1 SV=2	3	0.334195	0.346737	0.369828	0.744732	0.197697	0.47863	0.903649
924	3.91	5.81	14.59	5.182	sp|Q08209|PP2BA_HUMAN	Serine/threonine-protein phosphatase 2B catalytic subunit alpha isoform OS=Homo sapiens GN=PPP3CA PE=1 SV=1	3	0.92045	0.954993	1	0.981748	1.09648	1	1
925	3.89	5.61	26.85	10.07	sp|P12235|ADT1_HUMAN	ADP/ATP translocase 1 OS=Homo sapiens GN=SLC25A4 PE=1 SV=4	3	1.19124	1.1695	0.963829	1.07647	1.35519	0.963829	1
926	3.88	5.44	12.63	3.006	sp|P54753|EPHB3_HUMAN	Ephrin type-B receptor 3 OS=Homo sapiens GN=EPHB3 PE=1 SV=2	3	0.685488	0.613762	0.801678	0.787046	1.02802	0.855067	0.990832
927	3.85	3.96	19.07	12.37	sp|P46781|RS9_HUMAN	40S ribosomal protein S9 OS=Homo sapiens GN=RPS9 PE=1 SV=3	3	3.22107	2.53513	0.564937	4.32514	9.46237	6.25173	3.66438
928	3.83	3.91	28.85	17.79	sp|O14807|RASM_HUMAN	Ras-related protein M-Ras OS=Homo sapiens GN=MRAS PE=1 SV=2	3	1.69044	1.41906	0.972747	1.41906	1.39316	1.7378	1.67494
929	3.8	3.9	13.78	3.683	tr|A0A0D9SF53|A0A0D9SF53_HUMAN	ATP-dependent RNA helicase DDX3X OS=Homo sapiens GN=DDX3X PE=1 SV=1	3	0.731139	0.772681	0.145881	0.448745	1.22462	0.928966	1.38038
930	3.73	4.36	30.41	12.37	sp|P07305|H10_HUMAN	Histone H1.0 OS=Homo sapiens GN=H1F0 PE=1 SV=3	3	8.70964	11.5878	8.55067	0.660693	15.1356	11.5878	4.65586
931	3.73	3.84	15.86	5.97	sp|O15131|IMA6_HUMAN	Importin subunit alpha-6 OS=Homo sapiens GN=KPNA5 PE=1 SV=2	3	0.619441	0.544503	0.630957	1.11686	0.847227	0.847227	1.00925
932	3.73	3.83	8.736	1.781	sp|Q9P2J2|TUTLA_HUMAN	Protein turtle homolog A OS=Homo sapiens GN=IGSF9 PE=1 SV=2	3	1.03753	1.15878	1.11686	0.717794	0.928966	0.787046	0.824138
933	3.72	3.86	27.8	9.129	tr|F8WAR4|F8WAR4_HUMAN	MICOS complex subunit MIC19 OS=Homo sapiens GN=CHCHD3 PE=1 SV=1	3	2.80543	2.22844	1.8197	1.47231	2.67917	1.99526	0.990832
934	3.7	3.78	23.49	11.45	sp|Q9Y3C6|PPIL1_HUMAN	Peptidyl-prolyl cis-trans isomerase-like 1 OS=Homo sapiens GN=PPIL1 PE=1 SV=1	3	0.731139	1.0666	1.15878	0.794328	0.954993	1.03753	0.816582
935	3.67	3.79	28.57	16.75	sp|Q969Q5|RAB24_HUMAN	Ras-related protein Rab-24 OS=Homo sapiens GN=RAB24 PE=1 SV=1	3	0.496592	0.49204	0.648634	0.591562	0.704693	0.77983	0.654636
936	3.62	5.85	12.96	6.085	sp|P51991|ROA3_HUMAN	Heterogeneous nuclear ribonucleoprotein A3 OS=Homo sapiens GN=HNRNPA3 PE=1 SV=2	3	1.05682	1.07647	0.83946	1.15878	1.48594	1.08643	1
937	3.6	3.78	17.46	4.762	sp|Q9H993|ARMT1_HUMAN	Protein-glutamate O-methyltransferase OS=Homo sapiens GN=ARMT1 PE=1 SV=1	3	0.416869	0.263027	0.809096	1.51356	0.580764	1.21339	1.34276
938	3.59	3.66	14.69	7.347	sp|P56537|IF6_HUMAN	Eukaryotic translation initiation factor 6 OS=Homo sapiens GN=EIF6 PE=1 SV=1	3	2.10863	1.77011	2.01372	1.6293	0.711214	0.49204	0.809096
939	3.57	3.62	29.71	12.57	sp|P02792|FRIL_HUMAN	Ferritin light chain OS=Homo sapiens GN=FTL PE=1 SV=2	3	16.5959	26.7917	18.8799	13.1826	1.02802	4.2462	25.3513
940	3.47	3.55	30.99	22.54	sp|Q9NS69|TOM22_HUMAN	Mitochondrial import receptor subunit TOM22 homolog OS=Homo sapiens GN=TOMM22 PE=1 SV=3	3	1.88799	1.88799	1	1.80302	2.55859	1.21339	1.25893
941	3.35	3.51	12.21	4.58	tr|F5H0C4|F5H0C4_HUMAN	Proteasomal ATPase-associated factor 1 OS=Homo sapiens GN=PAAF1 PE=1 SV=1	3	0.691831	0.544503	0.879023	0.751623	0.359749	0.328095	0.672977
942	3.23	3.51	23.33	3.636	sp|P54136|SYRC_HUMAN	Arginine--tRNA ligase, cytoplasmic OS=Homo sapiens GN=RARS PE=1 SV=2	3	0.432514	0.717794	0.862979	1.22462	0.660693	0.704693	1.09648
943	3.22	3.44	15.58	4.978	sp|P02790|HEMO_HUMAN	Hemopexin OS=Homo sapiens GN=HPX PE=1 SV=2	3	0.165959	0.127057	0.270396	0.879023	0.0737904	0.625173	0.177011
944	3.21	3.49	14.61	1.467	sp|Q9H3S7|PTN23_HUMAN	Tyrosine-protein phosphatase non-receptor type 23 OS=Homo sapiens GN=PTPN23 PE=1 SV=1	3	0.744732	0.928966	0.981748	0.912011	0.809096	0.912011	0.937562
945	3.18	5.35	5.869	2.303	sp|Q9H6K5|PRR36_HUMAN	Proline-rich protein 36 OS=Homo sapiens GN=PRR36 PE=2 SV=2	3	0.737904	0.981748	1.01859	0.666807	0.619441	0.787046	0.737904
946	3.16	3.78	15.1	7.323	sp|P26641|EF1G_HUMAN	Elongation factor 1-gamma OS=Homo sapiens GN=EEF1G PE=1 SV=3	3	0.981748	0.794328	0.608135	0.870964	1.45881	0.912011	0.963829
947	3.16	3.41	34.21	18.42	sp|Q15847|ADIRF_HUMAN	Adipogenesis regulatory factor OS=Homo sapiens GN=ADIRF PE=1 SV=1	3	3.66438	7.72681	12.2462	2.85759	1.39316	1.85353	2.33346
948	3.04	3.27	31.38	7.331	sp|Q9Y376|CAB39_HUMAN	Calcium-binding protein 39 OS=Homo sapiens GN=CAB39 PE=1 SV=1	3	1.1272	1.34276	1.0666	1.61436	1.13763	1.31826	1.45881
949	2.94	5.64	20.19	7.143	sp|Q00577|PURA_HUMAN	Transcriptional activator protein Pur-alpha OS=Homo sapiens GN=PURA PE=1 SV=2	3	2.44343	1.58489	1.15878	2.58226	2.05116	2.67917	1.88799
950	2.86	2.93	14.17	4.251	sp|Q99615|DNJC7_HUMAN	DnaJ homolog subfamily C member 7 OS=Homo sapiens GN=DNAJC7 PE=1 SV=2	3	0.448745	0.660693	0.0457088	0.544503	0.963829	0.937562	0.654636
951	2.85	5	29.85	11.08	sp|P14550|AK1A1_HUMAN	Alcohol dehydrogenase [NADP(+)] OS=Homo sapiens GN=AKR1A1 PE=1 SV=3	3	0.544503	0.816582	0.92045	0.737904	0.580764	0.758578	0.855067
952	2.79	2.85	22.22	10.32	sp|Q16543|CDC37_HUMAN	Hsp90 co-chaperone Cdc37 OS=Homo sapiens GN=CDC37 PE=1 SV=1	3	1.02802	1.28233	1.43219	1.05682	1.22462	1.11686	1.28233
953	2.69	2.79	23.28	9.052	tr|E7EQ34|E7EQ34_HUMAN	Uncharacterized protein OS=Homo sapiens PE=4 SV=2	3	2.22844	2.48886	2.07014	0.937562	2.01372	0.92045	1.07647
954	2.68	3.36	18.69	9.091	sp|O43583|DENR_HUMAN	Density-regulated protein OS=Homo sapiens GN=DENR PE=1 SV=2	3	0.912011	5.54626	6.98232	5.80764	3.98107	1.80302	1.13763
955	2.65	4.98	27.7	11.27	sp|P48047|ATPO_HUMAN	ATP synthase subunit O, mitochondrial OS=Homo sapiens GN=ATP5O PE=1 SV=1	3	1.77011	0.954993	0.731139	1.19124	2.55859	1.19124	0.519996
956	2.54	5.26	25.56	5.833	tr|Q86UY0|Q86UY0_HUMAN	Protein BLOC1S5-TXNDC5 OS=Homo sapiens GN=TXNDC5 PE=1 SV=1	3	2.35505	1.45881	0.794328	1.02802	3.0761	0.654636	1.34276
957	2.54	2.68	15.11	4.556	sp|Q9NZ32|ARP10_HUMAN	Actin-related protein 10 OS=Homo sapiens GN=ACTR10 PE=1 SV=1	3	0.440555	0.0401791	0.0394457	1.04713	0.554626	0.642688	1.65959
958	2.5	2.72	19.11	4.963	sp|P39023|RL3_HUMAN	60S ribosomal protein L3 OS=Homo sapiens GN=RPL3 PE=1 SV=2	3	0.457088	0.534564	0.529663	1.07647	1.48594	1.24738	1.03753
959	2.44	2.48	25.96	8.936	sp|Q9BVK6|TMED9_HUMAN	Transmembrane emp24 domain-containing protein 9 OS=Homo sapiens GN=TMED9 PE=1 SV=2	3	3.80189	3.43558	2.65461	0.937562	2.37684	0.809096	1.59956
960	2.4	3.88	12.53	3.758	sp|Q9H074|PAIP1_HUMAN	Polyadenylate-binding protein-interacting protein 1 OS=Homo sapiens GN=PAIP1 PE=1 SV=1	3	1.43219	1.09648	1.01859	1.48594	1.28233	1.21339	1.33045
961	2.37	2.57	21.26	4.31	sp|Q9P2T1|GMPR2_HUMAN	GMP reductase 2 OS=Homo sapiens GN=GMPR2 PE=1 SV=1	3	0.283139	0.356451	0.570164	0.452898	0.0887156	0.242103	0.887156
962	2.31	4.76	12.1	4.234	sp|P30419|NMT1_HUMAN	Glycylpeptide N-tetradecanoyltransferase 1 OS=Homo sapiens GN=NMT1 PE=1 SV=2	3	1.31826	0.928966	2.22844	0.636796	1.38038	0.972747	2.18776
963	2.3	2.36	20.79	7.885	sp|Q68D91|MBLC2_HUMAN	Metallo-beta-lactamase domain-containing protein 2 OS=Homo sapiens GN=MBLAC2 PE=2 SV=3	3	0.608135	0.724436	0.679204	0.679204	0.60256	0.636796	0.912011
964	2.08	4.33	9.338	3.056	sp|Q9UMX0|UBQL1_HUMAN	Ubiquilin-1 OS=Homo sapiens GN=UBQLN1 PE=1 SV=2	3	2.65461	3.66438	3.83707	1.88799	0.591562	1.52757	2.63027
965	2.07	4.99	18.15	10.27	tr|A6NM71|A6NM71_HUMAN	Uncharacterized protein OS=Homo sapiens PE=4 SV=3	3	28.3139	9.46237	9.46237	0.990832	26.3027	9.46237	0.990832
966	2.07	4.24	4.762	1.232	sp|P78504|JAG1_HUMAN	Protein jagged-1 OS=Homo sapiens GN=JAG1 PE=1 SV=3	3	1.38038	1.23595	0.903649	0.619441	1.27057	0.765597	1.23595
967	2.07	4.07	11.7	5.292	sp|O00767|ACOD_HUMAN	Acyl-CoA desaturase OS=Homo sapiens GN=SCD PE=1 SV=2	3	0.77983	0.92045	0.648634	1.01859	1.8197	1.20226	0.887156
968	2.07	3.62	13.77	1.922	sp|Q27J81|INF2_HUMAN	Inverted formin-2 OS=Homo sapiens GN=INF2 PE=1 SV=2	3	1.59956	0.591562	1.15878	3.56451	5.15229	3.83707	4.74242
969	2.07	2.26	16.45	3.214	tr|E9PER6|E9PER6_HUMAN	3-phosphoinositide-dependent protein kinase 1 OS=Homo sapiens GN=PDPK1 PE=1 SV=1	3	1.10662	1.1695	1.08643	1.04713	0.928966	1.18032	1.24738
970	2.05	2.06	20.3	11.81	sp|Q9Y5M8|SRPRB_HUMAN	Signal recognition particle receptor subunit beta OS=Homo sapiens GN=SRPRB PE=1 SV=3	3	1.31826	1.1272	0.630957	0.816582	1.87068	0.794328	1.15878
971	2.02	3.31	19.34	4.834	sp|P53611|PGTB2_HUMAN	Geranylgeranyl transferase type-2 subunit beta OS=Homo sapiens GN=RABGGTB PE=1 SV=2	3	0.597035	0.549541	0.554626	1	0.60256	0.895365	0.879023
972	2.01	5.71	28.52	10.07	sp|P05141|ADT2_HUMAN	ADP/ATP translocase 2 OS=Homo sapiens GN=SLC25A5 PE=1 SV=7	3	1.6293	1.48594	1.36773	1.2942	1.49968	1.21339	1.05682
973	2.01	2.68	19.71	7.299	sp|P48507|GSH0_HUMAN	Glutamate--cysteine ligase regulatory subunit OS=Homo sapiens GN=GCLM PE=1 SV=1	3	0.895365	0.928966	1.02802	1	1.05682	1.09648	1
974	2.01	2.61	16.04	6.604	tr|E9PF18|E9PF18_HUMAN	Hydroxyacyl-coenzyme A dehydrogenase, mitochondrial OS=Homo sapiens GN=HADH PE=1 SV=1	3	5.10505	4.44631	4.83059	10.8643	2.10863	1	1.11686
975	2.01	2.01	15.9	6.506	sp|P52597|HNRPF_HUMAN	Heterogeneous nuclear ribonucleoprotein F OS=Homo sapiens GN=HNRNPF PE=1 SV=3	3	0.809096	0.83946	1.10662	0.758578	0.534564	1	0.981748
976	2	6.02	16.67	6.173	sp|P51665|PSMD7_HUMAN	26S proteasome non-ATPase regulatory subunit 7 OS=Homo sapiens GN=PSMD7 PE=1 SV=2	3	1.58489	1.48594	1.03753	1.7378	1.58489	1.58489	1.33045
977	2	4.55	22.8	6.485	sp|Q9UQM7|KCC2A_HUMAN	Calcium/calmodulin-dependent protein kinase type II subunit alpha OS=Homo sapiens GN=CAMK2A PE=1 SV=2	3	0.461318	0.679204	0.539511	0.870964	0.92045	0.554626	0.60256
978	2	4.33	14.97	3.355	sp|P47897|SYQ_HUMAN	Glutamine--tRNA ligase OS=Homo sapiens GN=QARS PE=1 SV=1	3	0.737904	0.619441	1.1272	0.855067	0.534564	0.591562	0.963829
979	2	4.02	4.559	0.6692	sp|Q5D862|FILA2_HUMAN	Filaggrin-2 OS=Homo sapiens GN=FLG2 PE=1 SV=1	3	3.46737	5.64937	3.7325	7.17794	3.46737	4.05509	3.25087
980	2	4.02	23.46	9.465	tr|H0Y8X4|H0Y8X4_HUMAN	2'-deoxynucleoside 5'-phosphate N-hydrolase 1 (Fragment) OS=Homo sapiens GN=DNPH1 PE=1 SV=1	3	1.15878	0.887156	1.09648	0.963829	1.48594	1.33045	1.01859
981	2	3.51	11.41	2.349	sp|Q12906|ILF3_HUMAN	Interleukin enhancer-binding factor 3 OS=Homo sapiens GN=ILF3 PE=1 SV=3	3	0.731139	0.83946	0.416869	0.724436	1	0.831764	1.19124
982	2	3.03	14.38	1.471	sp|P53621|COPA_HUMAN	Coatomer subunit alpha OS=Homo sapiens GN=COPA PE=1 SV=2	3	0.685488	0.717794	0.591562	0.981748	0.704693	0.704693	1.65959
983	2	2.39	17.13	5.093	sp|Q7L9L4|MOB1B_HUMAN	MOB kinase activator 1B OS=Homo sapiens GN=MOB1B PE=1 SV=3	3	1.67494	1.07647	1.5417	2.93765	1.72187	2.24905	1.97697
984	2	2.24	17.26	4.235	sp|Q9NTX5|ECHD1_HUMAN	Ethylmalonyl-CoA decarboxylase OS=Homo sapiens GN=ECHDC1 PE=1 SV=2	3	0.539511	0.390841	0.416869	1.08643	0.660693	0.597035	1.07647
985	2	2.19	15.78	2.333	sp|P56192|SYMC_HUMAN	Methionine--tRNA ligase, cytoplasmic OS=Homo sapiens GN=MARS PE=1 SV=2	3	0.801678	0.77983	0.809096	0.758578	1.01859	0.954993	0.92045
986	2	2.14	18.2	1.654	sp|Q96M89|CC138_HUMAN	Coiled-coil domain-containing protein 138 OS=Homo sapiens GN=CCDC138 PE=1 SV=1	3	0.405509	0.57544	0.570164	0.487529	0.343558	0.359749	1.25893
987	2	2.09	11.69	1.798	sp|O75570|RF1M_HUMAN	Peptide chain release factor 1, mitochondrial OS=Homo sapiens GN=MTRF1 PE=1 SV=2	3	1.14815	0.744732	1.30617	0.895365	1.36773	0.83946	0.765597
988	2	2.07	14.3	2.293	sp|Q969R2|OSBP2_HUMAN	Oxysterol-binding protein 2 OS=Homo sapiens GN=OSBP2 PE=1 SV=2	3	1.24738	1.83654	2.44343	2.12814	1.03753	0.990832	1.6293
989	1.93	2.14	11.81	1.567	sp|P35573|GDE_HUMAN	Glycogen debranching enzyme OS=Homo sapiens GN=AGL PE=1 SV=3	3	0.711214	0.539511	0.654636	0.758578	0.580764	0.717794	0.903649
990	1.89	2.65	10.77	1.381	sp|Q96PY5|FMNL2_HUMAN	Formin-like protein 2 OS=Homo sapiens GN=FMNL2 PE=1 SV=3	3	0.630957	0.57544	0.597035	0.559758	0.824138	0.47863	0.772681
991	1.72	1.95	22.3	15.54	tr|A0A087WY85|A0A087WY85_HUMAN	Ubiquitin-conjugating enzyme E2 D3 OS=Homo sapiens GN=UBE2D3 PE=1 SV=1	3	0.731139	0.794328	0.937562	0.787046	0.731139	0.912011	0.831764
992	1.66	2.1	20.47	4.941	tr|D6RGI3|D6RGI3_HUMAN	Septin 11, isoform CRA_b OS=Homo sapiens GN=SEPT11 PE=1 SV=1	3	0.954993	0.887156	1.41906	0.895365	0.972747	1	0.737904
993	1.52	3.68	3.635	1.118	sp|Q15714|T22D1_HUMAN	TSC22 domain family protein 1 OS=Homo sapiens GN=TSC22D1 PE=1 SV=3	3	1.10662	2.208	1.97697	0.963829	1.49968	1.1695	1.31826
994	1.48	3.98	22.73	10.91	sp|P81605|DCD_HUMAN	Dermcidin OS=Homo sapiens GN=DCD PE=1 SV=2	3	2.31206	1.90546	2.33346	1.87068	1.19124	0.990832	0.981748
995	1.3	3.58	10.71	3.968	sp|Q96AD5|PLPL2_HUMAN	Patatin-like phospholipase domain-containing protein 2 OS=Homo sapiens GN=PNPLA2 PE=1 SV=1	3	0.772681	0.457088	0.895365	0.642688	0.586138	0.737904	0.744732
996	4.48	4.97	26.17	3.579	tr|I3L0H8|I3L0H8_HUMAN	ATP-dependent RNA helicase DDX19A OS=Homo sapiens GN=DDX19A PE=1 SV=1	2	0.337287	0.340408	0.383707	0.887156	0.461318	0.642688	0.824138
997	4.44	4.68	22.22	4.831	sp|O75874|IDHC_HUMAN	Isocitrate dehydrogenase [NADP] cytoplasmic OS=Homo sapiens GN=IDH1 PE=1 SV=2	2	0.322107	0.128233	0.0310456	1.23595	0.440555	0.717794	0.794328
998	4.33	4.41	18.82	5.882	tr|J3KNF4|J3KNF4_HUMAN	Copper chaperone for superoxide dismutase OS=Homo sapiens GN=CCS PE=1 SV=1	2	0.248886	0.387258	0.376704	0.428549	0.235505	0.319154	0.474242
999	4.3	4.32	22.97	9.187	tr|D6RD18|D6RD18_HUMAN	Heterogeneous nuclear ribonucleoprotein A/B OS=Homo sapiens GN=HNRNPAB PE=1 SV=1	2	1.43219	1.45881	1.44544	1.04713	1.58489	1.14815	1.22462
1000	4.28	4.45	21.3	2.905	sp|P26639|SYTC_HUMAN	Threonine--tRNA ligase, cytoplasmic OS=Homo sapiens GN=TARS PE=1 SV=3	2	0.711214	0.619441	0.794328	1.34276	1.21339	1.90546	1.25893
1001	4.18	4.18	21.13	9.155	sp|P26885|FKBP2_HUMAN	Peptidyl-prolyl cis-trans isomerase FKBP2 OS=Homo sapiens GN=FKBP2 PE=1 SV=2	2	17.5388	19.5884	20.7014	1.83654	12.3595	5.49541	3.01995
1002	4.17	4.26	12.73	3.818	tr|H7BY55|H7BY55_HUMAN	Complement decay-accelerating factor OS=Homo sapiens GN=CD55 PE=1 SV=2	2	6.85488	8.24138	4.83059	5.39511	4.2462	3.22107	2.208
1003	4.17	4.18	32.86	12.14	tr|I3L0M9|I3L0M9_HUMAN	Transcription elongation factor B polypeptide 2 (Fragment) OS=Homo sapiens GN=TCEB2 PE=1 SV=1	2	0.954993	0.855067	0.981748	1.04713	0.990832	1.14815	1.04713
1004	4.14	4.53	23.69	8.434	sp|P62753|RS6_HUMAN	40S ribosomal protein S6 OS=Homo sapiens GN=RPS6 PE=1 SV=1	2	2.58226	2.10863	1.80302	1.94089	5.64937	2.99226	1.04713
1005	4.14	4.4	21.51	4.728	sp|P01011|AACT_HUMAN	Alpha-1-antichymotrypsin OS=Homo sapiens GN=SERPINA3 PE=1 SV=2	2	0.313329	0.283139	0.319154	1.11686	0.413047	1.25893	0.559758
1006	4.14	4.16	33.65	9.953	sp|P26373|RL13_HUMAN	60S ribosomal protein L13 OS=Homo sapiens GN=RPL13 PE=1 SV=4	2	0.731139	0.870964	0.772681	0.77983	0.870964	0.895365	0.758578
1007	4.12	4.2	26.06	8.099	sp|Q9BPW8|NIPS1_HUMAN	Protein NipSnap homolog 1 OS=Homo sapiens GN=NIPSNAP1 PE=1 SV=1	2	1.48594	1.21339	1	1.22462	1.52757	1.2942	1.36773
1008	4.12	4.17	14.08	6.69	sp|Q9UBV8|PEF1_HUMAN	Peflin OS=Homo sapiens GN=PEF1 PE=1 SV=1	2	3.98107	2.37684	1.80302	6.91831	3.66438	0.946237	1.30617
1009	4.11	4.12	37.57	15.87	sp|Q6UW68|TM205_HUMAN	Transmembrane protein 205 OS=Homo sapiens GN=TMEM205 PE=1 SV=1	2	3.13329	0.816582	1.72187	1.25893	2.99226	2.80543	1.48594
1010	4.08	4.1	14.24	7.121	sp|Q13642|FHL1_HUMAN	Four and a half LIM domains protein 1 OS=Homo sapiens GN=FHL1 PE=1 SV=4	2	1.07647	2.35505	0.887156	3.37287	2.35505	3.34195	1.83654
1011	4.06	4.07	13.14	6.186	sp|Q8NFZ8|CADM4_HUMAN	Cell adhesion molecule 4 OS=Homo sapiens GN=CADM4 PE=1 SV=1	2	1.1695	1.0666	1.39316	0.92045	0.794328	1.18032	0.981748
1012	4.04	4.11	13.87	3.915	sp|O95831|AIFM1_HUMAN	Apoptosis-inducing factor 1, mitochondrial OS=Homo sapiens GN=AIFM1 PE=1 SV=1	2	1.39316	1.27057	1.34276	1.5417	1.75388	1.57036	1.13763
1013	4.03	4.05	24.4	11.31	tr|E9PR47|E9PR47_HUMAN	Mth938 domain-containing protein OS=Homo sapiens GN=AAMDC PE=1 SV=1	2	0.717794	0.903649	0.972747	0.698232	0.801678	0.870964	0.903649
1014	4.02	4.25	23.12	10.4	sp|Q969H8|MYDGF_HUMAN	Myeloid-derived growth factor OS=Homo sapiens GN=MYDGF PE=1 SV=1	2	0.895365	1.09648	1.25893	0.794328	0.698232	0.879023	1.05682
1015	4.02	4.16	28.16	7.282	sp|P30043|BLVRB_HUMAN	Flavin reductase (NADPH) OS=Homo sapiens GN=BLVRB PE=1 SV=3	2	3.34195	0.383707	2.33346	1.88799	1.48594	5.44503	4.87528
1016	4.02	4.04	17.7	4.983	sp|Q86UE4|LYRIC_HUMAN	Protein LYRIC OS=Homo sapiens GN=MTDH PE=1 SV=2	2	0.870964	1.00925	0.862979	0.801678	1	0.744732	0.824138
1017	4.01	4.04	12.21	5.684	tr|A0A0A0MRT6|A0A0A0MRT6_HUMAN	Abl interactor 1 OS=Homo sapiens GN=ABI1 PE=1 SV=1	2	1.07647	0.870964	0.772681	1.1272	1.52757	1.30617	0.903649
1018	4.01	4.03	12.59	2.623	tr|H0Y626|H0Y626_HUMAN	Uncharacterized protein OS=Homo sapiens PE=4 SV=2	2	0.711214	0.685488	0.685488	0.83946	0.870964	0.870964	1.1695
1019	4.01	4.03	31.52	14.55	sp|P30050|RL12_HUMAN	60S ribosomal protein L12 OS=Homo sapiens GN=RPL12 PE=1 SV=1	2	2.65461	1.01859	0.398107	1.03753	5.01187	1.7378	1.57036
1020	4.01	4.01	12.33	3.976	sp|Q8NC56|LEMD2_HUMAN	LEM domain-containing protein 2 OS=Homo sapiens GN=LEMD2 PE=1 SV=1	2	5.05825	4.57088	2.208	5.86138	4.7863	4.7863	8.09096
1021	4.01	4.01	27.72	18.81	tr|C9JFR7|C9JFR7_HUMAN	Cytochrome c (Fragment) OS=Homo sapiens GN=CYCS PE=1 SV=1	2	1.28233	1.45881	1.8197	0.539511	1.01859	0.642688	0.731139
1022	4.01	4.01	30.06	20.86	sp|Q13526|PIN1_HUMAN	Peptidyl-prolyl cis-trans isomerase NIMA-interacting 1 OS=Homo sapiens GN=PIN1 PE=1 SV=1	2	0.981748	1.34276	1.04713	0.870964	1.57036	1.33045	1.21339
1023	4	4.6	28.65	7.022	sp|Q14558|KPRA_HUMAN	Phosphoribosyl pyrophosphate synthase-associated protein 1 OS=Homo sapiens GN=PRPSAP1 PE=1 SV=2	2	0.717794	0.465586	0.416869	0.903649	0.510505	0.666807	1.14815
1024	4	4.23	18.86	6.587	sp|Q9NZL9|MAT2B_HUMAN	Methionine adenosyltransferase 2 subunit beta OS=Homo sapiens GN=MAT2B PE=1 SV=1	2	2.0893	0.879023	0.134276	1.45881	0.847227	1.7378	1.19124
1025	4	4.14	14.98	3.745	sp|Q9Y608|LRRF2_HUMAN	Leucine-rich repeat flightless-interacting protein 2 OS=Homo sapiens GN=LRRFIP2 PE=1 SV=1	2	1.97697	1.99526	1.88799	1.03753	1.18032	1.14815	0.92045
1026	4	4.1	29.76	13.69	sp|P30049|ATPD_HUMAN	ATP synthase subunit delta, mitochondrial OS=Homo sapiens GN=ATP5D PE=1 SV=2	2	6.60693	6.19441	2.83139	2.10863	3.83707	1.34276	1.90546
1027	4	4.06	10.51	3.106	sp|Q93050|VPP1_HUMAN	V-type proton ATPase 116 kDa subunit a isoform 1 OS=Homo sapiens GN=ATP6V0A1 PE=1 SV=3	2	1.21339	0.77983	0.903649	1.04713	0.824138	1.04713	1.31826
1028	4	4.03	17.54	8.772	tr|J3QT77|J3QT77_HUMAN	Serum paraoxonase/arylesterase 2 OS=Homo sapiens GN=PON2 PE=1 SV=1	2	1.92309	1.49968	1.1272	1.44544	2.58226	1.44544	1.35519
1029	4	4.02	24.21	14.74	tr|H3BMV3|H3BMV3_HUMAN	Hematological and neurological-expressed 1-like protein (Fragment) OS=Homo sapiens GN=HN1L PE=1 SV=1	2	0.831764	1.2942	1.58489	0.765597	1.03753	0.737904	0.816582
1030	4	4.01	13.36	3.082	sp|P23368|MAOM_HUMAN	NAD-dependent malic enzyme, mitochondrial OS=Homo sapiens GN=ME2 PE=1 SV=1	2	0.946237	1.1272	1.22462	1.10662	1.6293	0.912011	1
1031	4	4.01	12.4	2.669	sp|P48506|GSH1_HUMAN	Glutamate--cysteine ligase catalytic subunit OS=Homo sapiens GN=GCLC PE=1 SV=2	2	0.444631	0.613762	0.544503	0.895365	0.60256	0.751623	0.758578
1032	4	4.01	11.75	5.738	tr|B3KS98|B3KS98_HUMAN	Eukaryotic translation initiation factor 3 subunit H OS=Homo sapiens GN=EIF3H PE=1 SV=1	2	0.717794	0.765597	0.809096	0.981748	1.01859	0.912011	0.879023
1033	4	4.01	12.08	5.705	sp|Q96CN7|ISOC1_HUMAN	Isochorismatase domain-containing protein 1 OS=Homo sapiens GN=ISOC1 PE=1 SV=3	2	0.413047	0.765597	1.19124	0.711214	0.331131	0.549541	0.903649
1034	4	4.01	27.94	12.5	sp|O95295|SNAPN_HUMAN	SNARE-associated protein Snapin OS=Homo sapiens GN=SNAPIN PE=1 SV=1	2	1.41906	1.30617	1.69044	1.19124	0.946237	0.879023	0.83946
1035	4	4.01	34.29	21.43	tr|F5GZY7|F5GZY7_HUMAN	Gamma-aminobutyric acid receptor-associated protein-like 1 (Fragment) OS=Homo sapiens GN=GABARAPL1 PE=1 SV=1	2	0.751623	0.591562	1.27057	1.08643	0.325087	0.580764	0.990832
1036	4	4	14.41	3.549	sp|Q9BTU6|P4K2A_HUMAN	Phosphatidylinositol 4-kinase type 2-alpha OS=Homo sapiens GN=PI4K2A PE=1 SV=1	2	1.7378	1.44544	1.44544	1.15878	1.15878	2.14783	2.01372
1037	4	4	16.23	4.057	sp|Q16658|FSCN1_HUMAN	Fascin OS=Homo sapiens GN=FSCN1 PE=1 SV=3	2	0.990832	1.01859	1.0666	1.23595	1.59956	1.23595	1.02802
1038	4	4	19.2	8.696	sp|Q86Y82|STX12_HUMAN	Syntaxin-12 OS=Homo sapiens GN=STX12 PE=1 SV=1	2	1.24738	1.57036	1.49968	1.09648	0.83946	0.809096	1.10662
1039	4	4	22.28	9.783	sp|Q15382|RHEB_HUMAN	GTP-binding protein Rheb OS=Homo sapiens GN=RHEB PE=1 SV=1	2	1.30617	1.20226	0.946237	1.45881	1.36773	1.13763	1.28233
1040	4	4	12.02	5.865	sp|Q8ND76|CCNY_HUMAN	Cyclin-Y OS=Homo sapiens GN=CCNY PE=1 SV=2	2	0.879023	0.744732	0.666807	0.816582	0.613762	0.765597	0.717794
1041	4	4	29.59	19.39	tr|G3XAN8|G3XAN8_HUMAN	Mitochondrial import inner membrane translocase subunit Tim8 B OS=Homo sapiens GN=TIMM8B PE=1 SV=1	2	1.23595	1.36773	1.11686	0.855067	1.21339	0.831764	0.963829
1042	4	4	12.75	8.054	sp|Q96CA5|BIRC7_HUMAN	Baculoviral IAP repeat-containing protein 7 OS=Homo sapiens GN=BIRC7 PE=1 SV=2	2	0.972747	0.711214	1.36773	1.48594	1.35519	1.65959	1.24738
1043	4	4	24.81	13.95	sp|P10606|COX5B_HUMAN	Cytochrome c oxidase subunit 5B, mitochondrial OS=Homo sapiens GN=COX5B PE=1 SV=2	2	1.83654	1.48594	1.31826	1.35519	1.51356	1.48594	0.895365
1044	4	4	10.48	6.799	sp|P01876|IGHA1_HUMAN	Ig alpha-1 chain C region OS=Homo sapiens GN=IGHA1 PE=1 SV=2	2	0.666807	0.619441	0.772681	1.03753	0.539511	0.870964	0.744732
1045	4	4	17.91	13.93	sp|Q9H902|REEP1_HUMAN	Receptor expression-enhancing protein 1 OS=Homo sapiens GN=REEP1 PE=1 SV=1	2	1.77011	1.51356	1.11686	1.24738	2.22844	1.39316	1.40605
1046	4	4	17.88	15.64	sp|O60888|CUTA_HUMAN	Protein CutA OS=Homo sapiens GN=CUTA PE=1 SV=2	2	0.685488	0.794328	0.862979	1.14815	0.751623	0.765597	0.816582
1047	4	4	28.97	25.23	sp|Q9UJC5|SH3L2_HUMAN	SH3 domain-binding glutamic acid-rich-like protein 2 OS=Homo sapiens GN=SH3BGRL2 PE=1 SV=2	2	14.9968	12.8233	8.87156	14.4544	27.2898	23.3346	13.0617
1048	4	4	8.482	6.696	sp|Q6P587|FAHD1_HUMAN	Acylpyruvase FAHD1, mitochondrial OS=Homo sapiens GN=FAHD1 PE=1 SV=2	2	1.48594	1.52757	1.85353	1	1.58489	1	1.05682
1049	4	4	28.89	23.33	sp|P62072|TIM10_HUMAN	Mitochondrial import inner membrane translocase subunit Tim10 OS=Homo sapiens GN=TIMM10 PE=1 SV=1	2	1.18032	1.36773	1.35519	1.11686	0.954993	1.05682	1.14815
1050	4	4	30.12	30.12	sp|Q9BUW7|CI016_HUMAN	UPF0184 protein C9orf16 OS=Homo sapiens GN=C9orf16 PE=1 SV=1	2	0.544503	0.731139	0.912011	0.597035	0.591562	0.580764	0.737904
1051	3.97	4.02	15.51	5.263	sp|Q9NV96|CC50A_HUMAN	Cell cycle control protein 50A OS=Homo sapiens GN=TMEM30A PE=1 SV=1	2	1.47231	1.11686	0.895365	1.13763	1.09648	1.36773	1.43219
1052	3.95	4.1	21.56	4.192	sp|P14868|SYDC_HUMAN	Aspartate--tRNA ligase, cytoplasmic OS=Homo sapiens GN=DARS PE=1 SV=2	2	0.115878	0.224905	0.258226	0.57544	0.316228	0.231206	0.847227
1053	3.92	4.19	19.62	4.545	sp|P43686|PRS6B_HUMAN	26S protease regulatory subunit 6B OS=Homo sapiens GN=PSMC4 PE=1 SV=2	2	1.08643	1	1.23595	1.31826	1.13763	1.09648	1.18032
1054	3.89	3.98	36.36	17.05	tr|Q5T123|Q5T123_HUMAN	SH3 domain-binding glutamic acid-rich-like protein 3 OS=Homo sapiens GN=SH3BGRL3 PE=1 SV=1	2	1.0666	1.15878	1.34276	0.879023	1.1272	1.10662	0.903649
1055	3.89	3.98	17.02	12.23	tr|G5E9Q6|G5E9Q6_HUMAN	Profilin OS=Homo sapiens GN=PFN2 PE=1 SV=1	2	0.862979	1.48594	1.59956	1.78649	1.47231	1.69044	1.69044
1056	3.86	3.9	12.29	2.876	tr|Q86YQ0|Q86YQ0_HUMAN	HZGJ OS=Homo sapiens GN=HZGJ PE=2 SV=1	2	2.12814	2.85759	3.0761	2.72898	0.49204	0.636796	1.07647
1057	3.82	3.89	13.13	8.081	sp|P25325|THTM_HUMAN	3-mercaptopyruvate sulfurtransferase OS=Homo sapiens GN=MPST PE=1 SV=3	2	0.824138	0.879023	0.794328	1.08643	1.09648	1.18032	1.09648
1058	3.8	3.85	22.43	22.43	tr|H3BRV9|H3BRV9_HUMAN	Nuclear transport factor 2 (Fragment) OS=Homo sapiens GN=NUTF2 PE=1 SV=1	2	0.158489	0.246604	0.0679204	1.19124	0.457088	1.65959	0.946237
1059	3.78	3.83	8.457	4.44	tr|K4DIA0|K4DIA0_HUMAN	ICOS ligand OS=Homo sapiens GN=ICOSLG PE=1 SV=1	2	1.90546	1.48594	1.45881	1.05682	1.44544	1.20226	0.83946
1060	3.77	4.28	16.21	6.207	sp|Q969X5|ERGI1_HUMAN	Endoplasmic reticulum-Golgi intermediate compartment protein 1 OS=Homo sapiens GN=ERGIC1 PE=1 SV=1	2	1.80302	1.31826	1.25893	1.11686	1.85353	1.22462	1.24738
1061	3.77	3.83	13.45	5.882	sp|P08962|CD63_HUMAN	CD63 antigen OS=Homo sapiens GN=CD63 PE=1 SV=2	2	20.3236	25.1189	22.08	14.0605	10.2802	8.87156	8.31764
1062	3.73	3.81	16.44	6.393	sp|Q9NZZ3|CHMP5_HUMAN	Charged multivesicular body protein 5 OS=Homo sapiens GN=CHMP5 PE=1 SV=1	2	1.43219	1.88799	1.92309	1.20226	1.02802	1.10662	1.0666
1063	3.71	3.8	18.45	2.899	sp|Q13619|CUL4A_HUMAN	Cullin-4A OS=Homo sapiens GN=CUL4A PE=1 SV=3	2	0.758578	0.758578	0.758578	0.816582	0.711214	0.887156	0.912011
1064	3.67	3.76	16.55	8.966	tr|E9PL10|E9PL10_HUMAN	Transcription factor BTF3 OS=Homo sapiens GN=BTF3L4 PE=1 SV=1	2	1.04713	1.59956	1.8197	0.613762	0.642688	0.444631	0.912011
1065	3.64	3.7	14.5	6.949	sp|Q8NHP1|ARK74_HUMAN	Aflatoxin B1 aldehyde reductase member 4 OS=Homo sapiens GN=AKR7L PE=2 SV=6	2	0.847227	1.25893	1.33045	1.47231	1.02802	1.0666	1.09648
1066	3.6	3.88	20.22	6.859	sp|Q99436|PSB7_HUMAN	Proteasome subunit beta type-7 OS=Homo sapiens GN=PSMB7 PE=1 SV=1	2	1.30617	1.85353	2.42103	1.67494	0.534564	0.666807	0.440555
1067	3.58	3.7	18.75	8.929	sp|O43760|SNG2_HUMAN	Synaptogyrin-2 OS=Homo sapiens GN=SYNGR2 PE=1 SV=1	2	1.49968	2.96483	2.05116	0.337287	1.65959	1.38038	1.90546
1068	3.57	3.66	48.57	23.81	sp|P31949|S10AB_HUMAN	Protein S100-A11 OS=Homo sapiens GN=S100A11 PE=1 SV=2	2	5.54626	6.66807	3.53183	2.1677	1.44544	1.48594	1.57036
1069	3.52	3.59	15.71	15.71	tr|G3V583|G3V583_HUMAN	Protein FAM177A1 (Fragment) OS=Homo sapiens GN=FAM177A1 PE=1 SV=1	2	1.24738	1.44544	1.04713	0.847227	1.08643	0.937562	1.2942
1070	3.49	3.57	14.94	6.897	sp|Q99714|HCD2_HUMAN	3-hydroxyacyl-CoA dehydrogenase type-2 OS=Homo sapiens GN=HSD17B10 PE=1 SV=3	2	0.990832	0.731139	0.660693	0.847227	1	0.77983	1.0666
1071	3.43	3.49	12.27	2.539	sp|Q92542|NICA_HUMAN	Nicastrin OS=Homo sapiens GN=NCSTN PE=1 SV=2	2	1.34276	1.20226	1.58489	1.15878	0.383707	0.363078	0.737904
1072	3.41	3.49	21.37	12.82	sp|P49207|RL34_HUMAN	60S ribosomal protein L34 OS=Homo sapiens GN=RPL34 PE=1 SV=3	2	0.679204	0.963829	0.862979	0.855067	1.1272	0.928966	0.912011
1073	3.41	3.47	22.03	6.356	sp|Q9UNK0|STX8_HUMAN	Syntaxin-8 OS=Homo sapiens GN=STX8 PE=1 SV=2	2	26.7917	32.2107	30.761	14.8594	21.2814	14.1906	17.8649
1074	3.41	3.47	20.31	9.896	sp|Q15126|PMVK_HUMAN	Phosphomevalonate kinase OS=Homo sapiens GN=PMVK PE=1 SV=3	2	0.539511	0.691831	0.717794	1.02802	0.912011	1.04713	1.07647
1075	3.38	3.46	16.37	4.534	sp|P42765|THIM_HUMAN	3-ketoacyl-CoA thiolase, mitochondrial OS=Homo sapiens GN=ACAA2 PE=1 SV=2	2	0.963829	0.887156	0.92045	0.928966	0.937562	0.879023	0.92045
1076	3.34	3.49	23.74	7.194	tr|F6WQW2|F6WQW2_HUMAN	Ran-specific GTPase-activating protein OS=Homo sapiens GN=RANBP1 PE=1 SV=1	2	0.831764	0.654636	1.02802	0.570164	0.461318	0.474242	0.608135
1077	3.3	3.38	21.3	4.868	tr|E7ETB3|E7ETB3_HUMAN	Aspartyl aminopeptidase OS=Homo sapiens GN=DNPEP PE=1 SV=2	2	0.83946	0.83946	1.27057	1.08643	0.870964	0.903649	1.05682
1078	3.29	3.45	26.51	12.65	tr|A0A087X1K9|A0A087X1K9_HUMAN	Acyl-protein thioesterase 1 OS=Homo sapiens GN=LYPLA1 PE=1 SV=1	2	0.487529	0.524807	0.591562	0.685488	0.544503	0.794328	0.642688
1079	3.26	3.37	22.97	10.14	sp|P61626|LYSC_HUMAN	Lysozyme C OS=Homo sapiens GN=LYZ PE=1 SV=1	2	1.10662	0.981748	0.954993	1.04713	0.903649	0.847227	1.27057
1080	3.26	3.32	14.84	4.268	sp|P58005|SESN3_HUMAN	Sestrin-3 OS=Homo sapiens GN=SESN3 PE=2 SV=2	2	0.390841	0.369828	0.416869	0.534564	0.30761	0.346737	0.895365
1081	3.26	3.32	12.01	4.167	tr|H0YAV1|H0YAV1_HUMAN	Ribonucleoside-diphosphate reductase subunit M2 B (Fragment) OS=Homo sapiens GN=RRM2B PE=1 SV=1	2	0.794328	0.77983	1.01859	1.00925	0.751623	0.831764	1.11686
1082	3.24	3.34	11.87	2.171	sp|Q9P1Z2|CACO1_HUMAN	Calcium-binding and coiled-coil domain-containing protein 1 OS=Homo sapiens GN=CALCOCO1 PE=1 SV=2	2	0.946237	0.608135	0.772681	0.619441	0.744732	0.751623	0.855067
1083	3.19	3.25	25.34	12.33	sp|P62249|RS16_HUMAN	40S ribosomal protein S16 OS=Homo sapiens GN=RPS16 PE=1 SV=2	2	4.48745	12.5893	1.8197	15.5597	21.677	13.4276	2.35505
1084	3.18	3.46	24.6	14.11	sp|Q15056|IF4H_HUMAN	Eukaryotic translation initiation factor 4H OS=Homo sapiens GN=EIF4H PE=1 SV=5	2	1.64437	1.75388	2.18776	2.22844	1.97697	1.8197	1.88799
1085	3.18	3.3	43.68	13.68	sp|P41222|PTGDS_HUMAN	Prostaglandin-H2 D-isomerase OS=Homo sapiens GN=PTGDS PE=1 SV=1	2	0.887156	2.05116	2.0893	0.83946	0.444631	0.824138	1.15878
1086	3.17	3.34	25.19	16.79	sp|Q9Y237|PIN4_HUMAN	Peptidyl-prolyl cis-trans isomerase NIMA-interacting 4 OS=Homo sapiens GN=PIN4 PE=1 SV=1	2	0.816582	0.794328	1.18032	0.724436	0.765597	0.672977	0.787046
1087	3.16	3.22	26.95	7.813	tr|G8JLK1|G8JLK1_HUMAN	Vesicle transport protein USE1 OS=Homo sapiens GN=USE1 PE=1 SV=2	2	17.2187	19.0546	19.9526	4.96592	29.3765	15.5597	12.0226
1088	3.14	3.44	16.82	6.006	sp|O14908|GIPC1_HUMAN	PDZ domain-containing protein GIPC1 OS=Homo sapiens GN=GIPC1 PE=1 SV=2	2	0.77983	0.83946	0.765597	0.937562	1.23595	1.0666	0.963829
1089	3.13	3.28	6.733	2.993	sp|Q8IZ83|A16A1_HUMAN	Aldehyde dehydrogenase family 16 member A1 OS=Homo sapiens GN=ALDH16A1 PE=1 SV=2	2	0.436516	0.428549	0.343558	0.698232	0.288403	0.510505	1.1695
1090	3.07	3.16	20.43	8.602	tr|I3L504|I3L504_HUMAN	Eukaryotic translation initiation factor 5A-1 OS=Homo sapiens GN=EIF5A PE=1 SV=1	2	12.942	13.0617	10.5682	8.31764	16.293	11.272	7.51623
1091	3.07	3.14	17.32	5.315	sp|Q92575|UBXN4_HUMAN	UBX domain-containing protein 4 OS=Homo sapiens GN=UBXN4 PE=1 SV=2	2	0.816582	0.816582	0.794328	0.731139	0.972747	0.772681	0.981748
1092	3.06	3.35	19.2	2.671	sp|P61221|ABCE1_HUMAN	ATP-binding cassette sub-family E member 1 OS=Homo sapiens GN=ABCE1 PE=1 SV=1	2	0.356451	0.255859	0.214783	0.765597	0.679204	0.816582	1.2942
1093	3.03	3.17	15.82	6.734	tr|D6W5Y5|D6W5Y5_HUMAN	Cold inducible RNA binding protein, isoform CRA_c OS=Homo sapiens GN=CIRBP PE=1 SV=1	2	1.35519	1.80302	0.469894	0.636796	0.831764	1.04713	0.847227
1094	3.01	3.09	16.31	5.615	tr|B7ZC39|B7ZC39_HUMAN	Endophilin-B2 OS=Homo sapiens GN=SH3GLB2 PE=1 SV=1	2	1.21339	1.10662	1.0666	1.22462	1.21339	1.09648	1.02802
1095	3	3.11	22.25	7.853	sp|P35813|PPM1A_HUMAN	Protein phosphatase 1A OS=Homo sapiens GN=PPM1A PE=1 SV=1	2	0.642688	0.685488	0.648634	0.672977	0.654636	0.630957	0.625173
1096	3	3.08	23.47	5.782	tr|H7C5E2|H7C5E2_HUMAN	B-cell receptor-associated protein 29 (Fragment) OS=Homo sapiens GN=BCAP29 PE=1 SV=1	2	1.51356	1.22462	0.887156	0.870964	2.0893	1.18032	1.27057
1097	3	3.06	14.29	6.857	sp|Q9Y3F4|STRAP_HUMAN	Serine-threonine kinase receptor-associated protein OS=Homo sapiens GN=STRAP PE=1 SV=1	2	0.591562	0.549541	0.679204	0.751623	0.496592	0.772681	0.737904
1098	2.98	3.09	15.27	15.27	sp|Q8N3F0|MTURN_HUMAN	Maturin OS=Homo sapiens GN=MTURN PE=2 SV=2	2	0.737904	0.855067	0.809096	1.58489	0.679204	0.879023	1.05682
1099	2.96	3.02	19.47	8.947	sp|P62166|NCS1_HUMAN	Neuronal calcium sensor 1 OS=Homo sapiens GN=NCS1 PE=1 SV=2	2	12.942	11.8032	20.3236	9.37562	8.16582	6.72977	8.62979
1100	2.92	3.05	17.26	5.863	sp|Q92890|UFD1_HUMAN	Ubiquitin fusion degradation protein 1 homolog OS=Homo sapiens GN=UFD1L PE=1 SV=3	2	1.39316	1.24738	0.824138	1.14815	1.58489	1.43219	1.03753
1101	2.92	2.94	32.92	14.29	sp|O75947|ATP5H_HUMAN	ATP synthase subunit d, mitochondrial OS=Homo sapiens GN=ATP5H PE=1 SV=3	2	1.58489	1.43219	0.963829	1.09648	1.7378	1.05682	1.04713
1102	2.91	2.97	14.97	4.605	sp|Q8TAT6|NPL4_HUMAN	Nuclear protein localization protein 4 homolog OS=Homo sapiens GN=NPLOC4 PE=1 SV=3	2	1.43219	1.08643	1.25893	1.28233	1.28233	1.24738	1.13763
1103	2.9	2.97	8.779	1.527	sp|P06756|ITAV_HUMAN	Integrin alpha-V OS=Homo sapiens GN=ITGAV PE=1 SV=2	2	15.1356	21.8776	10.9648	11.1686	10.3753	10.666	11.5878
1104	2.88	2.94	16.45	6.926	sp|O95372|LYPA2_HUMAN	Acyl-protein thioesterase 2 OS=Homo sapiens GN=LYPLA2 PE=1 SV=1	2	7.94328	8.62979	8.87156	8.24138	18.8799	12.8233	9.0365
1105	2.88	2.93	8.287	6.077	sp|Q9BQJ4|TMM47_HUMAN	Transmembrane protein 47 OS=Homo sapiens GN=TMEM47 PE=1 SV=1	2	1.21339	1.2942	0.963829	0.954993	1.22462	1.09648	1.04713
1106	2.87	3.04	36.54	21.15	sp|P84090|ERH_HUMAN	Enhancer of rudimentary homolog OS=Homo sapiens GN=ERH PE=1 SV=1	2	7.37904	9.46237	10.4713	2.77971	7.31139	6.66807	5.91562
1107	2.87	2.98	17.14	8.98	sp|Q9NX40|OCAD1_HUMAN	OCIA domain-containing protein 1 OS=Homo sapiens GN=OCIAD1 PE=1 SV=1	2	1.28233	1.61436	0.937562	0.831764	1.30617	0.597035	0.724436
1108	2.86	2.93	21	8.924	sp|P06732|KCRM_HUMAN	Creatine kinase M-type OS=Homo sapiens GN=CKM PE=1 SV=2	2	1.1695	1.65959	1.87068	1.45881	0.47863	0.824138	0.801678
1109	2.85	2.91	13.46	6.728	sp|Q9H425|CA198_HUMAN	Uncharacterized protein C1orf198 OS=Homo sapiens GN=C1orf198 PE=1 SV=1	2	1.07647	0.887156	0.92045	0.711214	0.765597	0.758578	1.08643
1110	2.84	3.43	21.05	8.947	tr|F5H0U5|F5H0U5_HUMAN	Glycolipid transfer protein OS=Homo sapiens GN=GLTP PE=1 SV=1	2	0.946237	0.954993	0.963829	1.19124	0.937562	1	0.963829
1111	2.84	3.21	9.921	2.441	sp|Q08211|DHX9_HUMAN	ATP-dependent RNA helicase A OS=Homo sapiens GN=DHX9 PE=1 SV=4	2	0.879023	0.57544	0.613762	0.801678	0.794328	0.666807	0.981748
1112	2.8	2.94	18.68	11.54	sp|Q9BTE1|DCTN5_HUMAN	Dynactin subunit 5 OS=Homo sapiens GN=DCTN5 PE=1 SV=1	2	0.787046	0.672977	0.855067	0.946237	0.666807	0.660693	0.691831
1113	2.79	2.9	26.13	11.71	sp|P14927|QCR7_HUMAN	Cytochrome b-c1 complex subunit 7 OS=Homo sapiens GN=UQCRB PE=1 SV=2	2	2.0893	1.38038	1.19124	1.08643	1.18032	0.483059	0.591562
1114	2.79	2.85	14.92	8.468	sp|Q15773|MLF2_HUMAN	Myeloid leukemia factor 2 OS=Homo sapiens GN=MLF2 PE=1 SV=1	2	1.31826	1.47231	1.95884	0.847227	2.53513	1.90546	0.809096
1115	2.77	2.84	30.25	19.33	sp|P60866|RS20_HUMAN	40S ribosomal protein S20 OS=Homo sapiens GN=RPS20 PE=1 SV=1	2	1.6293	1.5417	0.246604	1.48594	3.04789	1.67494	1.75388
1116	2.77	2.82	9.317	5.28	sp|Q9H477|RBSK_HUMAN	Ribokinase OS=Homo sapiens GN=RBKS PE=1 SV=1	2	0.275423	0.801678	0.855067	0.487529	0.0452898	0.337287	0.895365
1117	2.76	2.81	26.52	16.02	sp|Q9ULC4|MCTS1_HUMAN	Malignant T-cell-amplified sequence 1 OS=Homo sapiens GN=MCTS1 PE=1 SV=1	2	10.9648	11.3763	9.72747	18.3654	15.8489	19.4089	11.0662
1118	2.75	3.05	17.05	4.773	sp|Q13501|SQSTM_HUMAN	Sequestosome-1 OS=Homo sapiens GN=SQSTM1 PE=1 SV=1	2	6.85488	7.65597	10	3.90841	8.24138	3.80189	2.65461
1119	2.75	2.91	9.275	1.793	sp|Q6WKZ4|RFIP1_HUMAN	Rab11 family-interacting protein 1 OS=Homo sapiens GN=RAB11FIP1 PE=1 SV=3	2	0.887156	0.928966	1.05682	0.731139	1.11686	0.879023	0.816582
1120	2.74	3.04	31.48	13.7	sp|Q9H008|LHPP_HUMAN	Phospholysine phosphohistidine inorganic pyrophosphate phosphatase OS=Homo sapiens GN=LHPP PE=1 SV=2	2	0.685488	0.862979	1.49968	1.14815	0.765597	0.544503	0.824138
1121	2.72	2.88	20.33	4.785	sp|P36955|PEDF_HUMAN	Pigment epithelium-derived factor OS=Homo sapiens GN=SERPINF1 PE=1 SV=4	2	0.376704	0.505825	0.0737904	0.666807	0.483059	0.744732	0.862979
1122	2.71	3.3	30	6.486	sp|Q92747|ARC1A_HUMAN	Actin-related protein 2/3 complex subunit 1A OS=Homo sapiens GN=ARPC1A PE=1 SV=2	2	0.580764	0.272898	0.353183	1.31826	0.448745	0.92045	0.954993
1123	2.71	2.79	12.25	3.213	sp|Q9Y6W5|WASF2_HUMAN	Wiskott-Aldrich syndrome protein family member 2 OS=Homo sapiens GN=WASF2 PE=1 SV=3	2	1.03753	0.83946	0.990832	1.00925	1.01859	1.01859	0.954993
1124	2.7	2.76	22.88	15.25	sp|Q6UWP8|SBSN_HUMAN	Suprabasin OS=Homo sapiens GN=SBSN PE=1 SV=2	2	1.11686	1.18032	1.23595	1.43219	1.15878	0.824138	0.946237
1125	2.69	2.74	8.805	6.289	sp|Q92820|GGH_HUMAN	Gamma-glutamyl hydrolase OS=Homo sapiens GN=GGH PE=1 SV=2	2	2.67917	3.59749	2.93765	0.824138	1.48594	0.465586	0.903649
1126	2.66	2.89	11.93	6.584	sp|Q9H1E3|NUCKS_HUMAN	Nuclear ubiquitous casein and cyclin-dependent kinase substrate 1 OS=Homo sapiens GN=NUCKS1 PE=1 SV=1	2	4.32514	5.91562	10	2.10863	2.03236	1.35519	0.981748
1127	2.66	2.72	13.75	5.444	sp|P29279|CTGF_HUMAN	Connective tissue growth factor OS=Homo sapiens GN=CTGF PE=1 SV=2	2	1.57036	2.53513	1.40605	0.242103	0.277971	0.772681	1.24738
1128	2.64	2.7	14.46	4.669	sp|P31040|SDHA_HUMAN	Succinate dehydrogenase [ubiquinone] flavoprotein subunit, mitochondrial OS=Homo sapiens GN=SDHA PE=1 SV=2	2	7.65597	11.272	5.64937	5.91562	6.48634	5.80764	6.0256
1129	2.64	2.68	15.12	10.73	sp|Q96AB3|ISOC2_HUMAN	Isochorismatase domain-containing protein 2, mitochondrial OS=Homo sapiens GN=ISOC2 PE=1 SV=1	2	2.63027	1.57036	1.83654	1.22462	1.70608	0.990832	1.43219
1130	2.61	2.68	24.86	10.73	tr|H0YN26|H0YN26_HUMAN	Acidic leucine-rich nuclear phosphoprotein 32 family member A OS=Homo sapiens GN=ANP32A PE=1 SV=1	2	1.14815	1.67494	1.35519	0.972747	1.09648	0.954993	0.887156
1131	2.59	2.63	26.12	12.69	tr|D6RD47|D6RD47_HUMAN	40S ribosomal protein S23 OS=Homo sapiens GN=RPS23 PE=1 SV=1	2	1.57036	1.14815	1.30617	0.895365	2.67917	1.57036	1.02802
1132	2.57	2.82	20.86	4.077	sp|P15086|CBPB1_HUMAN	Carboxypeptidase B OS=Homo sapiens GN=CPB1 PE=1 SV=4	2	0.685488	0.963829	0.862979	0.691831	0.346737	0.564937	1
1133	2.55	2.6	19.53	5.325	sp|O95433|AHSA1_HUMAN	Activator of 90 kDa heat shock protein ATPase homolog 1 OS=Homo sapiens GN=AHSA1 PE=1 SV=1	2	0.428549	0.387258	0.387258	1.22462	0.291072	1.25893	1.04713
1134	2.5	2.61	12.79	4.419	sp|Q9NW68|BSDC1_HUMAN	BSD domain-containing protein 1 OS=Homo sapiens GN=BSDC1 PE=1 SV=1	2	2.01372	1.39316	1.39316	0.963829	1.13763	1.01859	1.21339
1135	2.5	2.6	11.48	4.847	tr|F5GYQ1|F5GYQ1_HUMAN	V-type proton ATPase subunit d 1 OS=Homo sapiens GN=ATP6V0D1 PE=1 SV=1	2	1.1272	0.794328	0.92045	1.39316	0.912011	0.990832	1.2942
1136	2.47	2.5	17.63	7.105	tr|Q5VWC4|Q5VWC4_HUMAN	26S proteasome non-ATPase regulatory subunit 4 OS=Homo sapiens GN=PSMD4 PE=1 SV=1	2	2.05116	2.55859	0.809096	0.744732	2.96483	1.43219	1.6293
1137	2.45	2.64	14.53	6.419	sp|Q96GD0|PLPP_HUMAN	Pyridoxal phosphate phosphatase OS=Homo sapiens GN=PDXP PE=1 SV=2	2	0.672977	0.691831	0.946237	0.963829	0.824138	0.737904	1.34276
1138	2.42	2.46	22	4.5	sp|P36507|MP2K2_HUMAN	Dual specificity mitogen-activated protein kinase kinase 2 OS=Homo sapiens GN=MAP2K2 PE=1 SV=1	2	0.272898	0.102802	0.0519996	0.691831	0.11695	0.436516	0.912011
1139	2.41	2.47	10.33	1.568	sp|Q8N0W3|FUK_HUMAN	L-fucose kinase OS=Homo sapiens GN=FUK PE=2 SV=2	2	0.744732	0.554626	1.02802	0.794328	0.60256	0.751623	1.24738
1140	2.4	4.51	15.98	4.6	sp|P17174|AATC_HUMAN	Aspartate aminotransferase, cytoplasmic OS=Homo sapiens GN=GOT1 PE=1 SV=3	2	0.337287	0.487529	0.847227	0.501187	0.296483	0.319154	0.619441
1141	2.4	2.5	40.26	23.38	tr|K7ERI9|K7ERI9_HUMAN	Apolipoprotein C-I (Fragment) OS=Homo sapiens GN=APOC1 PE=1 SV=1	2	1.25893	1.59956	3.7325	1.14815	2.12814	0.824138	0.963829
1142	2.39	2.58	20.39	4.469	sp|O14745|NHRF1_HUMAN	Na(+)/H(+) exchange regulatory cofactor NHE-RF1 OS=Homo sapiens GN=SLC9A3R1 PE=1 SV=4	2	2.55859	3.34195	1.61436	0.47863	0.383707	1.52757	3.43558
1143	2.38	2.41	26.27	22.03	sp|O75348|VATG1_HUMAN	V-type proton ATPase subunit G 1 OS=Homo sapiens GN=ATP6V1G1 PE=1 SV=3	2	0.319154	0.534564	0.666807	0.183654	0.152757	0.17378	0.194089
1144	2.35	2.38	28.24	23.53	tr|F5GXX5|F5GXX5_HUMAN	Dolichyl-diphosphooligosaccharide--protein glycosyltransferase subunit DAD1 OS=Homo sapiens GN=DAD1 PE=1 SV=1	2	1.38038	1.67494	1.14815	0.679204	1.48594	0.928966	1.6293
1145	2.34	2.43	7.321	2.829	sp|Q9NRR5|UBQL4_HUMAN	Ubiquilin-4 OS=Homo sapiens GN=UBQLN4 PE=1 SV=2	2	1.38038	1.30617	1.64437	0.990832	1.24738	0.981748	1.11686
1146	2.29	3.1	27.15	12.58	sp|P62263|RS14_HUMAN	40S ribosomal protein S14 OS=Homo sapiens GN=RPS14 PE=1 SV=3	2	0.92045	0.946237	0.847227	1.00925	1.51356	1.04713	0.83946
1147	2.28	2.46	23.19	6.28	sp|P30405|PPIF_HUMAN	Peptidyl-prolyl cis-trans isomerase F, mitochondrial OS=Homo sapiens GN=PPIF PE=1 SV=1	2	1.61436	1.97697	1.88799	1.13763	1.34276	1.1272	1.52757
1148	2.28	2.38	15.21	3.896	sp|P49419|AL7A1_HUMAN	Alpha-aminoadipic semialdehyde dehydrogenase OS=Homo sapiens GN=ALDH7A1 PE=1 SV=5	2	0.816582	0.772681	1.01859	0.912011	0.787046	0.794328	0.946237
1149	2.26	2.72	16.53	3.306	tr|A0A087WUK2|A0A087WUK2_HUMAN	Heterogeneous nuclear ribonucleoprotein D-like OS=Homo sapiens GN=HNRNPDL PE=1 SV=1	2	4.48745	3.83707	0.954993	1.92309	7.31139	3.83707	3.83707
1150	2.2	4.34	11.26	1.088	sp|O15031|PLXB2_HUMAN	Plexin-B2 OS=Homo sapiens GN=PLXNB2 PE=1 SV=3	2	1.6293	1.49968	1.59956	1.11686	1.28233	1.18032	1.51356
1151	2.19	2.22	21.35	7.292	tr|K7ERF1|K7ERF1_HUMAN	Eukaryotic translation initiation factor 3 subunit K OS=Homo sapiens GN=EIF3K PE=1 SV=1	2	1.00925	0.946237	3.19154	1.39316	1.69044	1.27057	1.41906
1152	2.18	2.2	38.24	27.94	sp|P63218|GBG5_HUMAN	Guanine nucleotide-binding protein G(I)/G(S)/G(O) subunit gamma-5 OS=Homo sapiens GN=GNG5 PE=1 SV=3	2	14.3219	11.4815	10	4.28549	9.81748	6.19441	3.76704
1153	2.17	2.97	13.86	1.818	tr|H3BVG0|H3BVG0_HUMAN	Nuclear pore complex protein Nup93 OS=Homo sapiens GN=NUP93 PE=1 SV=1	2	0.912011	0.855067	0.717794	0.731139	0.895365	0.855067	0.751623
1154	2.15	4.21	20.76	3.488	sp|Q07065|CKAP4_HUMAN	Cytoskeleton-associated protein 4 OS=Homo sapiens GN=CKAP4 PE=1 SV=2	2	1.47231	1.25893	1.08643	0.751623	0.963829	0.731139	0.870964
1155	2.15	4	16.09	8.696	tr|Q6ICJ4|Q6ICJ4_HUMAN	Em:AP000351.3 protein OS=Homo sapiens GN=Em:AP000351.3 PE=1 SV=1	2	1.15878	1.11686	1.23595	2.26986	0.879023	1.83654	0.630957
1156	2.14	2.15	27.37	23.16	sp|P61956|SUMO2_HUMAN	Small ubiquitin-related modifier 2 OS=Homo sapiens GN=SUMO2 PE=1 SV=3	2	0.591562	0.794328	0.855067	0.636796	0.564937	0.691831	0.505825
1157	2.11	3.86	15.19	5.485	sp|P02774|VTDB_HUMAN	Vitamin D-binding protein OS=Homo sapiens GN=GC PE=1 SV=1	2	0.0325087	0.0207014	0.270396	0.474242	0.0570164	0.299226	0.212814
1158	2.11	2.8	34.78	23.19	sp|P56385|ATP5I_HUMAN	ATP synthase subunit e, mitochondrial OS=Homo sapiens GN=ATP5I PE=1 SV=2	2	0.912011	0.660693	0.515229	0.855067	0.666807	0.544503	0.642688
1159	2.09	2.44	9.565	2.029	sp|Q13797|ITA9_HUMAN	Integrin alpha-9 OS=Homo sapiens GN=ITGA9 PE=1 SV=2	2	1.45881	1.22462	1.33045	1.24738	1.22462	1.25893	1.28233
1160	2.08	2.46	35.42	10.42	sp|P47813|IF1AX_HUMAN	Eukaryotic translation initiation factor 1A, X-chromosomal OS=Homo sapiens GN=EIF1AX PE=1 SV=2	2	1.1272	1.18032	1.07647	0.758578	1.38038	0.809096	0.879023
1161	2.07	3.33	30.72	14.38	tr|H3BNX8|H3BNX8_HUMAN	Cytochrome c oxidase subunit 5A, mitochondrial OS=Homo sapiens GN=COX5A PE=1 SV=1	2	3.13329	3.98107	2.01372	1.92309	2.18776	1.90546	2.29087
1162	2.07	3.1	15.85	8.197	sp|Q9NX76|CKLF6_HUMAN	CKLF-like MARVEL transmembrane domain-containing protein 6 OS=Homo sapiens GN=CMTM6 PE=1 SV=1	2	1	0.92045	1	0.92045	0.787046	0.963829	0.895365
1163	2.07	2.97	16.54	12.6	sp|P53999|TCP4_HUMAN	Activated RNA polymerase II transcriptional coactivator p15 OS=Homo sapiens GN=SUB1 PE=1 SV=3	2	1.87068	1.52757	1.85353	0.92045	1.04713	0.765597	0.912011
1164	2.07	2.27	12.01	3.405	sp|P35052|GPC1_HUMAN	Glypican-1 OS=Homo sapiens GN=GPC1 PE=1 SV=2	2	1.13763	1.51356	1.7378	1.03753	0.691831	0.654636	1.1695
1165	2.06	3.77	16.45	2.396	sp|Q8IYK4|GT252_HUMAN	Procollagen galactosyltransferase 2 OS=Homo sapiens GN=COLGALT2 PE=1 SV=1	2	1.5417	0.131826	0.685488	1.36773	6.19441	2.96483	3.31131
1166	2.06	2.79	13.66	2.005	sp|O75534|CSDE1_HUMAN	Cold shock domain-containing protein E1 OS=Homo sapiens GN=CSDE1 PE=1 SV=2	2	1.08643	1.22462	0.981748	1.01859	1.64437	1.07647	1.1695
1167	2.06	2.08	34.83	14.61	sp|Q9Y5J7|TIM9_HUMAN	Mitochondrial import inner membrane translocase subunit Tim9 OS=Homo sapiens GN=TIMM9 PE=1 SV=1	2	0.928966	1.03753	0.847227	0.928966	0.879023	0.698232	0.737904
1168	2.05	4.35	22.58	4.467	tr|A0A087X2I1|A0A087X2I1_HUMAN	26S protease regulatory subunit 10B OS=Homo sapiens GN=PSMC6 PE=1 SV=1	2	1.08643	1.1272	0.912011	1.15878	1.28233	1.2942	1.15878
1169	2.03	2.12	30.26	11.84	sp|Q9Y3D6|FIS1_HUMAN	Mitochondrial fission 1 protein OS=Homo sapiens GN=FIS1 PE=1 SV=2	2	1.25893	1.43219	1.77011	0.928966	1.24738	0.83946	0.903649
1170	2.02	4.06	13.08	5.296	sp|Q13630|FCL_HUMAN	GDP-L-fucose synthase OS=Homo sapiens GN=TSTA3 PE=1 SV=1	2	0.608135	0.666807	0.691831	0.83946	0.654636	0.554626	1.03753
1171	2.02	4.03	7.003	1.792	tr|F8W9S8|F8W9S8_HUMAN	Lethal(3)malignant brain tumor-like protein 4 OS=Homo sapiens GN=L3MBTL4 PE=1 SV=1	2	1.25893	0.954993	1.25893	0.912011	0.758578	0.887156	1.11686
1172	2.02	2.15	17.87	1.236	sp|A0AVT1|UBA6_HUMAN	Ubiquitin-like modifier-activating enzyme 6 OS=Homo sapiens GN=UBA6 PE=1 SV=1	2	0.642688	0.619441	0.47863	0.758578	0.903649	0.887156	1.39316
1173	2.02	2.12	18.92	5.405	sp|P13804|ETFA_HUMAN	Electron transfer flavoprotein subunit alpha, mitochondrial OS=Homo sapiens GN=ETFA PE=1 SV=1	2	5.91562	5.39511	2.26986	3.90841	5.80764	3.16228	2.67917
1174	2.02	2.06	12.86	2.707	sp|Q8N8S7|ENAH_HUMAN	Protein enabled homolog OS=Homo sapiens GN=ENAH PE=1 SV=2	2	1.41906	1.95884	1.80302	1.15878	0.990832	1.14815	0.972747
1175	2.02	2.02	17.96	5.689	sp|Q9UIC8|LCMT1_HUMAN	Leucine carboxyl methyltransferase 1 OS=Homo sapiens GN=LCMT1 PE=1 SV=2	2	0.751623	0.946237	0.83946	0.954993	0.597035	0.816582	1.01859
1176	2.01	2.14	15.19	4.144	sp|P55263|ADK_HUMAN	Adenosine kinase OS=Homo sapiens GN=ADK PE=1 SV=2	2	0.253513	0.229087	0.751623	1.19124	0.0990832	0.698232	0.954993
1177	2.01	2.09	20.34	14.69	tr|A0A096LNY9|A0A096LNY9_HUMAN	Transmembrane protein 114 OS=Homo sapiens GN=TMEM114 PE=4 SV=1	2	1.87068	1.5417	1.15878	1.64437	2.03236	3.37287	1.5417
1178	2.01	2.06	14.35	3.311	sp|P22695|QCR2_HUMAN	Cytochrome b-c1 complex subunit 2, mitochondrial OS=Homo sapiens GN=UQCRC2 PE=1 SV=3	2	1.07647	1.19124	0.824138	0.946237	1.30617	0.928966	1.14815
1179	2.01	2.03	13.55	1.38	sp|Q9Y4W6|AFG32_HUMAN	AFG3-like protein 2 OS=Homo sapiens GN=AFG3L2 PE=1 SV=2	2	1.36773	1.67494	1.0666	1	1.59956	1.23595	1.07647
1180	2.01	2.03	10.01	2.881	sp|Q92841|DDX17_HUMAN	Probable ATP-dependent RNA helicase DDX17 OS=Homo sapiens GN=DDX17 PE=1 SV=2	2	0.711214	0.855067	0.685488	0.625173	0.990832	0.698232	1.14815
1181	2	4.03	100	100	tr|K7EPS4|K7EPS4_HUMAN	Matrix-remodeling-associated protein 7 OS=Homo sapiens GN=MXRA7 PE=1 SV=1	2	2.33346	2.67917	1.75388	1.5417	1.30617	0.862979	1.6293
1182	2	4.02	22.63	10.7	sp|O95292|VAPB_HUMAN	Vesicle-associated membrane protein-associated protein B/C OS=Homo sapiens GN=VAPB PE=1 SV=3	2	0.679204	0.586138	0.564937	0.515229	0.801678	0.666807	1.47231
1183	2	4.01	20.78	6.926	tr|F8VZ49|F8VZ49_HUMAN	Heterogeneous nuclear ribonucleoprotein A1 (Fragment) OS=Homo sapiens GN=HNRNPA1 PE=1 SV=1	2	1.55597	1.1695	1.15878	1.19124	2.35505	1.48594	0.954993
1184	2	4	39.53	13.95	sp|P41208|CETN2_HUMAN	Centrin-2 OS=Homo sapiens GN=CETN2 PE=1 SV=1	2	3.80189	5.80764	5.80764	1.78649	2.22844	2.26986	1.40605
1185	2	4	14.78	3.941	sp|Q9BS26|ERP44_HUMAN	Endoplasmic reticulum resident protein 44 OS=Homo sapiens GN=ERP44 PE=1 SV=1	2	99.0832	99.0832	99.0832	99.0832	99.0832	99.0832	99.0832
1186	2	4	11.14	3.714	sp|O75381|PEX14_HUMAN	Peroxisomal membrane protein PEX14 OS=Homo sapiens GN=PEX14 PE=1 SV=1	2	18.0302	5.01187	1.8197	1.41906	1.64437	1.35519	1.52757
1187	2	4	17.89	7.895	sp|Q8WZA0|LZIC_HUMAN	Protein LZIC OS=Homo sapiens GN=LZIC PE=1 SV=1	2	1.58489	3.10456	3.53183	1.7378	1.94089	1.77011	1.28233
1188	2	3.44	19.22	5.212	sp|P60510|PP4C_HUMAN	Serine/threonine-protein phosphatase 4 catalytic subunit OS=Homo sapiens GN=PPP4C PE=1 SV=1	2	0.648634	0.83946	0.83946	0.912011	0.483059	0.816582	0.928966
1189	2	3.12	13.44	5.929	tr|J3KTL2|J3KTL2_HUMAN	Serine/arginine-rich-splicing factor 1 OS=Homo sapiens GN=SRSF1 PE=1 SV=1	2	2.88403	2.35505	1.80302	0.751623	1.70608	0.737904	0.816582
1190	2	2.97	12.38	3.96	tr|E7EVZ5|E7EVZ5_HUMAN	Prenylcysteine oxidase-like OS=Homo sapiens GN=PCYOX1L PE=1 SV=1	2	1.94089	1.15878	1.1695	1.59956	3.22107	2.07014	1.04713
1191	2	2.97	8.946	6.07	sp|O43765|SGTA_HUMAN	Small glutamine-rich tetratricopeptide repeat-containing protein alpha OS=Homo sapiens GN=SGTA PE=1 SV=1	2	0.990832	0.990832	1.0666	0.597035	0.879023	0.691831	0.903649
1192	2	2.89	23.45	5.752	sp|O75832|PSD10_HUMAN	26S proteasome non-ATPase regulatory subunit 10 OS=Homo sapiens GN=PSMD10 PE=1 SV=1	2	0.457088	0.524807	0.564937	1.30617	0.544503	0.534564	0.625173
1193	2	2.72	18.18	9.091	sp|Q9NR31|SAR1A_HUMAN	GTP-binding protein SAR1a OS=Homo sapiens GN=SAR1A PE=1 SV=1	2	1.07647	0.981748	1.51356	1.59956	1.41906	1.49968	1.64437
1194	2	2.69	7.721	2.448	sp|Q9NPQ8|RIC8A_HUMAN	Synembryn-A OS=Homo sapiens GN=RIC8A PE=1 SV=3	2	0.319154	0.30761	0.334195	0.698232	0.42462	0.570164	1.09648
1195	2	2.63	41.43	21.43	sp|P63173|RL38_HUMAN	60S ribosomal protein L38 OS=Homo sapiens GN=RPL38 PE=1 SV=2	2	0.972747	0.704693	0.731139	0.963829	1.55597	1.08643	1.03753
1196	2	2.6	13.8	2.726	sp|P46060|RAGP1_HUMAN	Ran GTPase-activating protein 1 OS=Homo sapiens GN=RANGAP1 PE=1 SV=1	2	0.672977	0.801678	0.704693	0.744732	1.13763	0.870964	0.990832
1197	2	2.51	11.75	3.548	sp|Q5TC84|OGRL1_HUMAN	Opioid growth factor receptor-like protein 1 OS=Homo sapiens GN=OGFRL1 PE=2 SV=1	2	1.39316	1.72187	1.1695	1.33045	1.69044	1.99526	1.40605
1198	2	2.35	24.51	16.67	sp|P62310|LSM3_HUMAN	U6 snRNA-associated Sm-like protein LSm3 OS=Homo sapiens GN=LSM3 PE=1 SV=2	2	1.24738	1.77011	1.67494	1.0666	1.25893	1.14815	1.22462
1199	2	2.32	12.99	5.906	sp|Q6Y1H2|HACD2_HUMAN	Very-long-chain (3R)-3-hydroxyacyl-CoA dehydratase 2 OS=Homo sapiens GN=HACD2 PE=1 SV=1	2	1.33045	1.01859	0.981748	1.11686	2.18776	1.40605	1.04713
1200	2	2.3	8.013	2.083	sp|Q9UHD9|UBQL2_HUMAN	Ubiquilin-2 OS=Homo sapiens GN=UBQLN2 PE=1 SV=2	2	3.83707	4.96592	4.2462	1.85353	2.60615	1.83654	1.83654
1201	2	2.3	32.33	8.271	sp|O15116|LSM1_HUMAN	U6 snRNA-associated Sm-like protein LSm1 OS=Homo sapiens GN=LSM1 PE=1 SV=1	2	1.0666	1.6293	2.0893	0.92045	1.38038	1.11686	1.35519
1202	2	2.2	15.41	6.767	sp|Q9Y287|ITM2B_HUMAN	Integral membrane protein 2B OS=Homo sapiens GN=ITM2B PE=1 SV=1	2	1.87068	1.77011	1.20226	1.27057	1.20226	1.21339	1.52757
1203	2	2.2	20.71	9.596	sp|P52815|RM12_HUMAN	39S ribosomal protein L12, mitochondrial OS=Homo sapiens GN=MRPL12 PE=1 SV=2	2	1.27057	1.20226	1.52757	1.13763	0.981748	0.92045	1.20226
1204	2	2.19	18.18	5.909	tr|H3BS44|H3BS44_HUMAN	Estradiol 17-beta-dehydrogenase 2 (Fragment) OS=Homo sapiens GN=HSD17B2 PE=1 SV=1	2	1.69044	1.05682	0.895365	1.19124	1.34276	1.0666	1.65959
1205	2	2.1	20.45	6.439	sp|Q969U7|PSMG2_HUMAN	Proteasome assembly chaperone 2 OS=Homo sapiens GN=PSMG2 PE=1 SV=1	2	87.0964	0.990832	0.990832	0.990832	77.2681	71.7794	0.990832
1206	2	2.08	11.26	1.383	tr|H3BUD4|H3BUD4_HUMAN	Phosphoinositide phospholipase C (Fragment) OS=Homo sapiens GN=PLCL1 PE=1 SV=1	2	1.51356	1.41906	1.58489	1.22462	1.34276	1.57036	1.01859
1207	2	2.08	21.11	4.985	sp|Q5T6V5|CI064_HUMAN	UPF0553 protein C9orf64 OS=Homo sapiens GN=C9orf64 PE=1 SV=1	2	0.47863	0.642688	0.440555	0.619441	0.363078	0.564937	0.879023
1208	2	2.07	17.06	3.968	sp|Q16401|PSMD5_HUMAN	26S proteasome non-ATPase regulatory subunit 5 OS=Homo sapiens GN=PSMD5 PE=1 SV=3	2	2.0893	0.895365	0.765597	1.48594	1.20226	1.64437	1.22462
1209	2	2.07	29.71	13.04	tr|A0A075B7A0|A0A075B7A0_HUMAN	60S ribosomal protein L18 OS=Homo sapiens GN=RPL18 PE=1 SV=1	2	1.1272	1.39316	1.02802	1.03753	1.8197	1.45881	1.08643
1210	2	2.05	9.034	1.765	sp|P51784|UBP11_HUMAN	Ubiquitin carboxyl-terminal hydrolase 11 OS=Homo sapiens GN=USP11 PE=1 SV=3	2	1	0.340408	0.787046	0.954993	0.831764	0.946237	0.724436
1211	2	2.05	32.88	13.7	sp|P12273|PIP_HUMAN	Prolactin-inducible protein OS=Homo sapiens GN=PIP PE=1 SV=1	2	1.8197	1.47231	2.48886	1.39316	1.24738	1.19124	1.85353
1212	2	2.03	15.22	1.286	sp|Q9BQS8|FYCO1_HUMAN	FYVE and coiled-coil domain-containing protein 1 OS=Homo sapiens GN=FYCO1 PE=1 SV=3	2	0.847227	0.963829	0.794328	1.01859	1.04713	1.15878	1.09648
1213	2	2.03	15.75	5.137	tr|A0A087X027|A0A087X027_HUMAN	Protein SETSIP OS=Homo sapiens GN=SETSIP PE=3 SV=1	2	1.30617	2.72898	2.53513	1.24738	1.08643	1.01859	0.862979
1214	2	2.03	5.315	1.483	sp|Q08499|PDE4D_HUMAN	cAMP-specific 3',5'-cyclic phosphodiesterase 4D OS=Homo sapiens GN=PDE4D PE=1 SV=2	2	1.31826	1.05682	1	1.10662	1.57036	1.40605	1.5417
1215	2	2.03	17.36	10.42	tr|J3QRJ3|J3QRJ3_HUMAN	Thy-1 membrane glycoprotein OS=Homo sapiens GN=THY1 PE=1 SV=1	2	20.893	29.1072	25.3513	19.7697	3.76704	20.5116	24.4343
1216	2	2.02	9.398	2.203	tr|A0A5E8|A0A5E8_HUMAN	GAS2-like protein 1 OS=Homo sapiens GN=GAS2L1 PE=1 SV=1	2	0.870964	0.990832	1.1695	0.870964	1.10662	1.28233	1.18032
1217	2	2	10.85	2.761	sp|Q9Y6M5|ZNT1_HUMAN	Zinc transporter 1 OS=Homo sapiens GN=SLC30A1 PE=1 SV=3	2	1.40605	1.57036	1.45881	1.19124	0.92045	1.43219	0.895365
1218	2	2	14.01	5.447	sp|Q5SRD1|TI23B_HUMAN	Putative mitochondrial import inner membrane translocase subunit Tim23B OS=Homo sapiens GN=TIMM23B PE=5 SV=2	2	0.597035	0.772681	0.972747	0.737904	0.642688	0.591562	0.928966
1219	2	2	11.11	3.704	sp|Q9H446|RWDD1_HUMAN	RWD domain-containing protein 1 OS=Homo sapiens GN=RWDD1 PE=1 SV=1	2	46.1318	52.9663	48.7528	46.5586	34.6737	27.2898	27.5423
1220	2	2	14.89	5.957	sp|P41227|NAA10_HUMAN	N-alpha-acetyltransferase 10 OS=Homo sapiens GN=NAA10 PE=1 SV=1	2	0.534564	0.642688	0.636796	0.654636	0.519996	0.666807	1.1695
1221	2	2	7.251	3.625	sp|O95278|EPM2A_HUMAN	Laforin OS=Homo sapiens GN=EPM2A PE=1 SV=2	2	0.704693	0.824138	0.666807	0.972747	0.57544	0.990832	0.847227
1222	2	2	20	16.8	sp|P13164|IFM1_HUMAN	Interferon-induced transmembrane protein 1 OS=Homo sapiens GN=IFITM1 PE=1 SV=3	2	0.751623	1.20226	0.954993	0.559758	0.57544	0.625173	0.816582
1223	1.96	4	15.45	7.724	sp|Q9BVT8|TMUB1_HUMAN	Transmembrane and ubiquitin-like domain-containing protein 1 OS=Homo sapiens GN=TMUB1 PE=1 SV=1	2	0.794328	1.03753	0.879023	0.648634	0.972747	0.772681	0.717794
1224	1.96	3.89	15.15	4.242	sp|Q3SXM5|HSDL1_HUMAN	Inactive hydroxysteroid dehydrogenase-like protein 1 OS=Homo sapiens GN=HSDL1 PE=1 SV=3	2	0.816582	0.737904	0.765597	0.816582	0.554626	0.519996	0.794328
1225	1.82	1.99	26.96	8.333	sp|Q96S19|CP013_HUMAN	UPF0585 protein C16orf13 OS=Homo sapiens GN=C16orf13 PE=1 SV=2	2	0.564937	0.608135	0.515229	0.457088	0.401791	0.420727	0.990832
1226	1.77	2.06	10.92	1.31	sp|O60502|OGA_HUMAN	Protein O-GlcNAcase OS=Homo sapiens GN=MGEA5 PE=1 SV=2	2	1.19124	1.05682	0.077983	1	1.8197	1.55597	1.90546
1227	1.73	1.91	15.17	3.473	sp|P22307|NLTP_HUMAN	Non-specific lipid-transfer protein OS=Homo sapiens GN=SCP2 PE=1 SV=2	2	1.5417	1.49968	1.15878	1.48594	1.31826	0.954993	1.22462
1228	1.72	2.28	18.7	4.935	sp|Q9BRX2|PELO_HUMAN	Protein pelota homolog OS=Homo sapiens GN=PELO PE=1 SV=2	2	0.409261	0.436516	0.440555	0.691831	0.534564	0.448745	1.27057
1229	1.72	1.88	14.8	4.834	tr|A0A087WXS7|A0A087WXS7_HUMAN	ATPase ASNA1 OS=Homo sapiens GN=ASNA1 PE=1 SV=1	2	1.19124	0.816582	1.07647	1.44544	1.45881	1.35519	1.28233
1230	1.63	1.81	14.79	4.11	sp|Q9Y2Z0|SGT1_HUMAN	Protein SGT1 homolog OS=Homo sapiens GN=SUGT1 PE=1 SV=3	2	0.862979	0.751623	0.895365	0.903649	0.862979	0.928966	0.937562
1231	1.6	1.75	24.05	4.43	tr|M0QYZ2|M0QYZ2_HUMAN	AP-2 complex subunit sigma OS=Homo sapiens GN=AP2S1 PE=1 SV=1	2	0.724436	0.222844	0.672977	0.954993	0.376704	0.505825	1.11686
1232	1.57	3.11	16.85	3.558	sp|P13674|P4HA1_HUMAN	Prolyl 4-hydroxylase subunit alpha-1 OS=Homo sapiens GN=P4HA1 PE=1 SV=2	2	0.990832	0.801678	1.08643	0.928966	1.0666	0.765597	0.954993
1233	1.55	3.1	32.56	5.581	sp|P50914|RL14_HUMAN	60S ribosomal protein L14 OS=Homo sapiens GN=RPL14 PE=1 SV=4	2	0.42462	0.630957	0.597035	0.444631	1.48594	0.862979	0.322107
1234	1.52	1.62	15.7	2.243	sp|Q02252|MMSA_HUMAN	Methylmalonate-semialdehyde dehydrogenase [acylating], mitochondrial OS=Homo sapiens GN=ALDH6A1 PE=1 SV=2	2	0.990832	0.972747	1.02802	1.0666	2.14783	1.0666	1.23595
1235	1.5	1.59	14.38	3.097	sp|P49411|EFTU_HUMAN	Elongation factor Tu, mitochondrial OS=Homo sapiens GN=TUFM PE=1 SV=2	2	1.1272	1.00925	1	0.92045	1.24738	0.698232	0.809096
1236	1.49	2.31	11.69	5.538	sp|Q13347|EIF3I_HUMAN	Eukaryotic translation initiation factor 3 subunit I OS=Homo sapiens GN=EIF3I PE=1 SV=1	2	1.03753	1.19124	0.928966	1.20226	1.27057	1.02802	1.22462
1237	1.47	1.56	11.94	3.044	sp|P51606|RENBP_HUMAN	N-acylglucosamine 2-epimerase OS=Homo sapiens GN=RENBP PE=1 SV=2	2	0.549541	0.440555	0.570164	0.580764	0.405509	0.436516	1.34276
1238	1.47	1.56	12.64	8.046	sp|Q9Y5S9|RBM8A_HUMAN	RNA-binding protein 8A OS=Homo sapiens GN=RBM8A PE=1 SV=1	2	1.6293	1.6293	1.72187	1.59956	1.48594	1.7378	1.38038
1239	1.45	1.61	29.66	14.41	sp|P62316|SMD2_HUMAN	Small nuclear ribonucleoprotein Sm D2 OS=Homo sapiens GN=SNRPD2 PE=1 SV=1	2	1.47231	1.49968	1.28233	0.847227	1.7378	1.1695	1.00925
1240	1.44	2.25	10.38	6.574	sp|Q96MP8|KCTD7_HUMAN	BTB/POZ domain-containing protein KCTD7 OS=Homo sapiens GN=KCTD7 PE=1 SV=1	2	1.31826	1.39316	1.55597	1.67494	1.13763	1.88799	1.7378
1241	1.42	1.74	13.67	2.842	tr|B4DKY1|B4DKY1_HUMAN	Cysteine--tRNA ligase, cytoplasmic OS=Homo sapiens GN=CARS PE=1 SV=1	2	3.04789	2.44343	1.28233	3.04789	2.58226	4.09261	1.59956
1242	1.38	1.46	22.12	13.46	sp|Q9H0R3|TM222_HUMAN	Transmembrane protein 222 OS=Homo sapiens GN=TMEM222 PE=1 SV=2	2	0.92045	0.698232	0.539511	0.887156	0.77983	0.963829	0.60256
1243	1.35	3.51	21.21	8.081	sp|O95057|DIRA1_HUMAN	GTP-binding protein Di-Ras1 OS=Homo sapiens GN=DIRAS1 PE=1 SV=1	2	0.20893	0.18197	0.452898	0.353183	0.258226	0.244343	0.457088
1244	1.35	1.5	9.809	4.36	tr|I3L1R7|I3L1R7_HUMAN	Ethanolamine-phosphate cytidylyltransferase OS=Homo sapiens GN=PCYT2 PE=1 SV=1	2	0.353183	0.380189	0.685488	0.787046	0.237684	0.831764	1.33045
1245	1.35	1.48	17	1.714	sp|P17655|CAN2_HUMAN	Calpain-2 catalytic subunit OS=Homo sapiens GN=CAPN2 PE=1 SV=6	2	1.00925	1.28233	0.654636	3.76704	1.85353	3.46737	4.16869
1246	1.34	1.48	25.11	9.362	sp|Q9UJ68|MSRA_HUMAN	Mitochondrial peptide methionine sulfoxide reductase OS=Homo sapiens GN=MSRA PE=1 SV=1	2	0.801678	0.887156	1.36773	0.972747	0.564937	0.564937	1.0666
1247	1.33	4.04	21.33	10.49	sp|P52907|CAZA1_HUMAN	F-actin-capping protein subunit alpha-1 OS=Homo sapiens GN=CAPZA1 PE=1 SV=3	2
1248	1.31	3.5	10.34	1.703	sp|O43747|AP1G1_HUMAN	AP-1 complex subunit gamma-1 OS=Homo sapiens GN=AP1G1 PE=1 SV=5	2	0.751623	0.765597	0.981748	0.737904	0.570164	0.672977	1.08643
1249	1.31	3.47	22.5	14.37	sp|Q9NWV4|CA123_HUMAN	UPF0587 protein C1orf123 OS=Homo sapiens GN=C1orf123 PE=1 SV=1	2	2.07014	1.45881	1.20226	1.88799	2.01372	2.31206	1.2942
1250	1.31	2	16.78	4.605	sp|Q96EQ0|SGTB_HUMAN	Small glutamine-rich tetratricopeptide repeat-containing protein beta OS=Homo sapiens GN=SGTB PE=1 SV=1	2	0.831764	0.990832	1	0.698232	0.672977	0.654636	1.09648
1251	1.3	3.57	17.24	4.926	sp|Q15041|AR6P1_HUMAN	ADP-ribosylation factor-like protein 6-interacting protein 1 OS=Homo sapiens GN=ARL6IP1 PE=1 SV=2	2	20.7014	23.3346	18.0302	11.4815	15.7036	10.4713	11.272
